# Supplementary material
Source: publisher figshare collection journal article supplement (https://acs.figshare.com/ndownloader/files/34848538)
Supplement: Supplementary file 1 [file 34848538]

## Sheet: Table of Contents
Tab	Description
Repurposing Collection	Compound names and z-scores
ALL	All Compound IDs: Includes Broad Repurposing Collection, Bioactive Library, DOS Informer Set, DOS-A Library

## Sheet: Repurposing Collection
Compound ID	Name	z-score (R) - 1	z-score (R) - 2
BRD-K43192255-048-01-0	((3S,6S,6aR,7R,7aR,8S,9R,10S,11aS,12R,12aR,13S,14S)-1-ethyl-11a,12-dihydroxy-6,8,10,13-tetramethoxydodecahydro-2H-3,6a,12-(epie	-2.42993	-1.87787
BRD-K31812033-003-11-0	(-) -Levobunolol hydrochloride	-5.09534	-4.68176
BRD-K27911943-001-02-8	(-)-[3R,4S]-Chromanol 293B	1.2544	2.86865
BRD-A57798559-004-02-3	(-)-Bicuculline methobromide	1.11547	2.76082
BRD-K61295575-001-03-6	(-)-Blebbistatin	-3.34203	-2.84222
BRD-K62240499-001-05-9	(-)-Huperzine A	0.62418	1.34417
BRD-K23163214-050-15-1	(-)-MK 801 maleate	-2.43875	-2.36374
BRD-K34851558-001-02-3	(-)-Parthenolide	-5.77244	-5.57108
BRD-K26548821-003-11-3	(-)-Quinpirole hydrochloride	-1.36041	-0.921055
BRD-K53532120-003-10-3	(-)-U-50488 hydrochloride	-2.81949	-2.52248
BRD-A86415025-050-01-0	(?)-1-(1,2-Diphenylethyl)piperidine maleate	-4.19707	-1.92971
BRD-A05457250-001-08-4	(?)-Bay K 8644	-0.573509	-0.390444
BRD-A75817871-001-06-7	(?)-Blebbistatin	-3.80353	-1.93908
BRD-K17850764-236-11-9	(?)-Cloprostenol sodium salt	-2.29591	-1.90112
BRD-A77577770-003-08-9	(?)-Palmitoylcarnitine chloride	-2.9971	-1.83599
BRD-K53532120-003-11-1	(?)-U-50488 hydrochloride	-4.09416	-3.80168
BRD-K73323637-003-10-9	(+) -Levobunolol hydrochloride	-3.80755	-2.8877
BRD-K76677554-003-02-1	(+)-AJ 76 hydrochloride	-2.44873	-0.748865
BRD-A07870296-001-07-4	(+)-Bicuculline	-2.53269	-2.29617
BRD-K54606188-001-16-4	(+)-JQ1	-5.69235	-3.62354
BRD-K25312248-001-01-5	(+)-Matrine	1.76031	2.9576
BRD-K58930050-050-16-6	(+)-MK 801 maleate	-2.76711	-2.71842
BRD-K62456038-003-07-1	(+)-PD 128907 hydrochloride	-1.73594	-1.62958
BRD-A47364545-003-02-6	(+)-SK&F 10047 hydrochloride	1.96838	2.41675
BRD-K66715657-050-01-0	(+)-UH 232 maleate	-2.57076	-1.21717
BRD-A12417644-001-07-6	(+)-Usniacin (D-Usnic acid)	-2.66005	0.136112
BRD-A14240607-003-27-9	(+,-)-Octopamine HCl	-4.25238	-3.48578
BRD-A13598753-001-02-0	(+/-)-5'-Chloro-5'-deoxy-ENBA	-4.70486	-2.31132
BRD-A49544621-003-03-6	(+/-)-AC 7954 hydrochloride	-5.77259	-3.85198
BRD-A01307728-001-01-4	(+/-)-AMG 487	-4.29383	-2.13832
BRD-A81603255-001-01-0	(+/-)-CPSI	-0.946667	-0.377
BRD-A86523169-001-01-0	(+/-)-NBI 74330	-0.201749	0.317979
BRD-A54228901-001-01-7	(+/-)-SLV 319	-1.73131	-0.81733
BRD-K14765469-003-13-0	(+/-)-Vesamicol hydrochloride	-3.86768	-3.45924
BRD-K93900986-001-15-0	(11alpha)-11-hydroxypregn-4-ene-3,20-dione	-2.72006	-1.0079
BRD-K99199077-001-16-1	(11beta)-11,21-dihydroxy-3,20-dioxopregn-4-en-17-yl butyrate	-0.504534	0.29754
BRD-K58277159-001-01-7	(11beta)-11-hydroxyandrost-4-ene-3,17-dione	-0.639791	0.508357
BRD-K06408664-001-02-7	(11beta)-9-fluoro-11,17-dihydroxy-3,20-dioxopregn-4-en-21-yl acetate	-0.473057	-0.328628
BRD-K10799896-001-24-7	(11beta,16beta)-21-chloro-9-fluoro-11-hydroxy-16-methyl-3,20-dioxopregna-1,4-dien-17-yl propionate	0.509635	0.544076
BRD-K75445017-001-01-1	(15alpha,16alpha,17beta)-estra-1,3,5(10)-triene-3,15,16,17-tetrol	-2.04462	-1.42901
BRD-K73504359-001-01-3	(15S,21S,24S,27S,30S)-15-(2-amino-2-oxoethyl)-1-((S)-1-((S)-2-((S)-1-((R)-2-amino-3-phenylpropanoyl)pyrrolidine-2-carboxamido)-5-guanidinopentanoyl)pyrrolidin-2-yl)-24-benzyl-30-((2S,3S)-1-((S)-2-((S);-4-carboxy-1-((S)-4-carboxy-1-((S)-1-((S)-1-carboxy-3-	-2.51271	-2.49234
BRD-K58810291-001-16-2	(16beta)-21-chloro-9-fluoro-16-methyl-3,11,20-trioxopregna-1,4-dien-17-yl butyrate	-0.480407	-0.396595
BRD-K07625016-001-01-2	(17beta)-17-ethynyl-3-oxoestr-4-en-17-yl heptanoate	5.85386	10.0117
BRD-K53319039-001-01-8	(17beta)-17-hydroxyestra-1,3,5(10)-trien-3-yl acetate	-1.39487	-0.997255
BRD-A37752546-001-01-9	(1E)-1-(2-hydroxy-5-methylphenyl)-1-dodecanone oxime	-2.34773	-2.18987
BRD-K80403280-001-02-1	(1R)-1-{[(2S)-2-aminopropanoyl]amino}ethylphosphonic acid	-0.184371	1.73948
BRD-K52756523-001-27-0	(1R,2R,3R,6R,7S,8S,9R,10R,12R,13S,15R,17S)-3-ethyl-2,10-dihydroxy-15-[(2-methoxyethoxy)methyl]-2,6,8,10,12,17-hexamethyl-5-oxo-	-3.74199	-3.48469
BRD-K52756523-001-28-8	(1R,2R,3R,6R,7S,8S,9R,10R,12R,13S,15R,17S)-9-(((2S,3R,4S,6R)-4-(dimethylamino)-3-hydroxy-6-methyltetrahydro-2H-pyran-2-yl)oxy)-3-ethyl-2,10-dihydroxy-7-(((2R,4S,5S,6S)-5-hydroxy-4-methoxy-4,6-dimethyl;tetrahydro-2H-pyran-2-yl)oxy)-15-((2-methoxyethoxy)met	-1.61994	-1.61269
BRD-A99899486-004-01-9	(1R,2R,4S,5S)-9-(cyclopropylmethyl)-7-{[(2S)-3-hydroxy-2-phenylpropanoyl]oxy}-9-methyl-3-oxa-9-azoniatricyclo[3.3.1.0~2,4~]nonane bromide	-1.44283	-1.05029
BRD-K90563805-001-02-6	(1R,3S,5R,7R,12R,22R,24S,25R,26S)-22-[(3-amino-3,6-dideoxy-beta-D-mannopyranosyl)oxy]-1,3,26-trihydroxy-12-methyl-10-oxo-6,11,28-trioxatricyclo[22.3.1.0~5,7~]octacosa-8,14,16,18,20-pentaene-25-carboxylic acid	-1.80741	-1.37174
BRD-K81616657-001-01-4	(1S)-1-(2-{4-[4-(aminocarbonyl)phenyl]-1-piperazinyl}ethyl)-N-methyl-3,4-dihydro-1H-2-benzopyran-6-carboxamide	-2.32183	-2.30427
BRD-K78122587-300-04-3	(1S,2S)-2-{2-[[3-(1H-benzimidazol-2-yl)propyl](methyl)amino]ethyl}-6-fluoro-1-isopropyl-1,2,3,4-tetrahydro-2-naphthalenyl cyclo	-5.38663	-5.18495
BRD-K65716359-001-04-7	(2,3,4-trihydroxyphenyl)(3,4,5-trihydroxyphenyl)methanone	-0.666945	1.76269
BRD-K60005752-001-01-9	(20S)-Protopanaxadiol	-0.878657	-0.325662
BRD-K15231341-001-01-5	(20S)-Protopanaxatriol	0.45692	0.669134
BRD-K90033078-001-08-7	(2E)-2-methyl-4-(7H-purin-6-ylamino)-2-buten-1-ol	-1.7651	-1.70086
BRD-K25154476-001-01-4	(2E)-N-cyclopropyl-3-(3-fluorophenyl)-2-propenamide	0.0948422	0.296089
BRD-K59866480-001-07-3	(2E,6E)-2,6-bis(4-hydroxy-3-methoxybenzylidene)cyclohexanone	-2.05646	-2.05354
BRD-K14379200-001-04-7	(2-imino-1-imidazolidinyl)acetic acid	0.889746	2.56352
BRD-K79437791-001-06-5	(2R)-2-(acetylamino)-3-{[(2E,6E)-3,7,11-trimethyl-2,6,10-dodecatrienyl]sulfanyl}propanoic acid	-1.21117	-0.943157
BRD-K24697665-001-02-2	(2R)-2-[(2-methyl-2-sulfanylpropanoyl)amino]-3-sulfanylpropanoic acid	-2.75233	-1.96868
BRD-K28121004-001-02-9	(2R)-2-{[(acetylamino)acetyl]amino}pentanedioic acid	-2.33696	-1.89077
BRD-K74227499-001-02-9	(2R)-2-amino-3-(methylselanyl)propanoic acid	-2.47668	-1.86694
BRD-K63123526-001-02-0	(2R)-2-amino-3-(methylsulfanyl)propanoic acid	-1.50895	-0.983854
BRD-K33809398-001-02-6	(2R)-2-amino-3-[(carboxymethyl)sulfanyl]propanoic acid	-2.63562	-2.36702
BRD-K17480742-001-01-1	(2R)-2-methyl-6-nitro-2-[(4-{4-[4-(trifluoromethoxy)phenoxy]-1-piperidinyl}phenoxy)methyl]-2,3-dihydroimidazo[2,1-b][1,3]oxazole	-3.62876	-1.38886
BRD-K35559145-001-01-3	(2R)-3-(2-methoxy-10H-phenothiazin-10-yl)-N,N,2-trimethyl-1-propanamine	-3.31194	-2.73584
BRD-K66094457-001-02-3	(2R)-4-(3-phosphonopropyl)-2-piperazinecarboxylic acid	-3.5363	-3.22781
BRD-K45163704-001-02-3	(2R)-4-[(2E)-3-phosphono-2-propenyl]-2-piperazinecarboxylic acid	-2.28345	-2.10468
BRD-K12852738-001-01-2	(2R)-cyclopentyl[4-(2-quinolinylmethoxy)phenyl]ethanoic acid	-1.63898	-1.35672
BRD-K68764924-001-03-2	(2R)-N-[(17R)-17,19-dihydroxy-18,18-dimethyl-3,12,16-trioxo-7,8-dithia-4,11,15-triazanonadec-1-yl]-2,4-dihydroxy-3,3-dimethylbutanamide	-0.482622	-0.288623
BRD-K91733562-001-05-0	(2R,3R)-2,3-bis(4-hydroxy-3-methoxybenzyl)-1,4-butanediol	-0.390074	-0.314082
BRD-M77041484-001-03-4	(2R,3R)-2-amino-3-(benzyloxy)succinic acid compound with (2S,3S)-2-amino-3-(benzyloxy)succinic acid (1:1)	-3.1218	-2.63755
BRD-K95362002-001-01-1	(2R,3R)-3-(cyclopentylmethyl)-N-hydroxy-4-oxo-4-(1-piperidinyl)-2-[(3,4,4-trimethyl-2,5-dioxo-1-imidazolidinyl)methyl]butanamide	-2.69953	-2.17071
BRD-K77320845-001-01-2	(2R,3R)-4-(beta-D-glucopyranosyloxy)-2,3-bis(4-hydroxy-3-methoxybenzyl)butyl beta-D-glucopyranoside	-2.60238	-1.92367
BRD-K78092779-001-01-6	(2R,3R,4R,5R)-2-(2-amino-6-hydroxy-9H-purin-9-yl)-5-(hydroxymethyl)-3-methyltetrahydrofuran-3,4-diol	0.959489	1.05315
BRD-K88701661-001-03-7	(2R,3S)-2,3-disulfanylbutanedioic acid	-2.61842	-2.03725
BRD-K67117832-001-01-9	(2R,3S,4R,5R)-2,3,4,5-tetrahydroxy-6-(((2S,3R,4S,5S,6R)-3,4,5-trihydroxy-6-((((2S,3R,4S,5S,6R)-3,4,5-trihydroxy-6-(hydroxymethyl)tetrahydro-2H-pyran-2-yl)oxy)methyl)tetrahydro-2H-pyran-2-yl)oxy)hexana;l	-0.822631	-0.801635
BRD-K03399463-001-01-6	(2S)-1-((2S)-2-{[(2S)-3-carboxy-2-({(2S)-4-methyl-2-[({4-[(2-toluidinocarbonyl)amino]phenyl}acetyl)amino]pentanoyl}amino)propanoyl]amino}-3-methylbutanoyl)-2-pyrrolidinecarboxylic acid	4.60936	5.16714
BRD-K26323068-001-01-8	(2S)-1-{(2S,5S,8R,11S,14S,17S,20S)-2-(3-{[amino(imino)methyl]amino}propyl)-11-(4-hydroxybenzyl)-14-(hydroxymethyl)-20-(1H-imidazol-4-ylmethyl)-17-(1H-indol-3-ylmethyl)-5,8-diisobutyl-4,7,10,13,16,19,2	-1.38235	-0.959989
BRD-M63173034-001-03-6	(2S)-2,6-diaminohexanoic acid compound with 2-(3-chloro-2-methylanilino)nicotinic acid (1:1)	-4.61188	-4.14027
BRD-K51784806-001-01-6	(2S)-2-[({(2S)-1-[(2S)-3-(acetylsulfanyl)-2-methylpropanoyl]-2-pyrrolidinyl}carbonyl)amino]-3-phenylpropanoic acid	-0.982723	-0.761051
BRD-K54863166-001-01-9	(2S)-2-[(4,6-dimethoxy-2-pyrimidinyl)oxy]-3-methoxy-3,3-diphenylpropanoic acid	-1.2595	-0.402509
BRD-K15327298-001-05-5	(2S)-2-{[(9H-fluoren-9-ylmethoxy)carbonyl]amino}-4-methylpentanoic acid	-0.995457	-0.425302
BRD-K30019776-001-01-9	(2S)-2-amino-3-(phosphonooxy)propanoic acid	-1.94345	-1.70066
BRD-K50122911-001-01-2	(2S)-2-amino-3-[4-(dihydroxyboryl)phenyl]propanoic acid	1.78825	2.25615
BRD-K82178523-001-01-6	(2S)-2-amino-4-(hydroxyamino)-4-oxobutanoic acid	-0.521099	0.0786343
BRD-K74664543-001-01-1	(2S)-2-amino-4-(methylselanyl)butanoic acid	-2.18393	-2.10893
BRD-K94780074-001-07-5	(2S)-2-amino-5-({(1R)-2-[(carboxymethyl)amino]-1-[(nitrososulfanyl)methyl]-2-oxoethyl}amino)-5-oxopentanoic acid	-3.2714	-3.12944
BRD-K97163964-001-04-1	(2S)-2-aminobutanedioic acid	0.00243233	2.36621
BRD-K62309135-001-05-2	(2S)-2-aminopentanedioic acid hydrochloride	-1.95099	-1.09175
BRD-K63247785-001-01-5	(2S)-3-(acetyloxy)-2-aminopropanoic acid	-0.16733	0.0459079
BRD-K11595419-001-02-2	(2S)-5-amino-2-{[(2S)-2-aminopropanoyl]amino}-5-oxopentanoic acid	-2.5665	-2.38318
BRD-K37151368-001-01-7	(2S)-N~1~-[(1S)-2-{[(1S,2R)-1-(aminocarbonyl)-2-hydroxypropyl]amino}-1-(4-hydroxybenzyl)-2-oxoethyl]-2-{[(2S,5S,8S,11S,14R)-14-amino-2,5,8-tris[(1R)-1-hydroxyethyl]-11-(hydroxymethyl)-4,7,10,13-tetrao	-0.80086	-0.725593
BRD-K30764557-001-01-5	(2S,3S,4R,6S)-4-acetoxy-6-(((2R,3S,4R,5R,6S)-6-(((4R,5S,6S,7R,9R,10R,11E,13E,16R)-10-acetoxy-5-methoxy-9,16-dimethyl-2-oxo-7-(2-oxoethyl)-4-(propionyloxy)oxacyclohexadeca-11,13-dien-6-yl)oxy)-4-(dimet;hylamino)-5-hydroxy-2-methyltetrahydro-2H-pyran-3-yl)o	1.13462	1.17647
BRD-K77070363-001-01-5	(2S,5R,8S,11S,14R,17S)-17-amino-2-(4-aminobutyl)-5-benzyl-18-(1H-imidazol-5-yl)-8,14-bis(1H-indol-3-ylmethyl)-11-methyl-4,7,10,13,16-pentaoxo-3,6,9,12,15-pentaazaoctadecan-1-amide	-1.38089	-1.11523
BRD-A19053834-050-09-5	(2Z)-2-butenedioic acid compound with 1-(8-chloro-10,11-dihydrodibenzo[b,f]thiepin-10-yl)-4-methylpiperazine (1:1)	-2.89385	-2.21431
BRD-K11927976-050-04-5	(2Z)-2-butenedioic acid compound with 10-(3-aminopropyl)-3,4-dimethyl-9(10H)-acridinone (1:1)	-4.422	-4.08481
BRD-A66435872-332-02-6	(2Z)-2-butenedioic acid compound with 6-{[2-(1H-imidazol-4-yl)ethyl]amino}-N-[4-(trifluoromethyl)phenyl]heptanamide (2:1)	-3.81367	-3.02833
BRD-K83192048-050-03-5	(2Z)-2-butenedioic acid compound with N,N-dimethyl-2-{3-[(1S)-1-(2-pyridinyl)ethyl]-1H-inden-2-yl}ethanamine (1:1)	-3.37113	-3.36718
BRD-K25146005-001-01-0	(2Z)-3-(1H-imidazol-4-yl)-2-propenoic acid	-0.673962	-0.310446
BRD-A67531813-001-01-6	(3,4-dihydroxy-5-(6-hydroxy-9H-purin-9-yl)tetrahydrofuran-2-yl)methyl dihydrogen phosphate	1.50405	1.92034
BRD-K07785030-001-01-6	(3beta)-7,17-dioxoandrost-5-en-3-yl acetate	-0.172896	0.155128
BRD-K99919177-001-01-3	(3beta,5beta,12beta)-3-({2,6-dideoxy-4-O-[2,6-dideoxy-4-O-(2,6-dideoxy-4-O-beta-D-glucopyranosyl-beta-D-ribo-hexopyranosyl)-beta-D-ribo-hexopyranosyl]-beta-D-ribo-hexopyranosyl}oxy)-12,14-dihydroxycar	-2.30629	-2.04356
BRD-A90272038-001-02-5	(3E)-2-amino-4-methyl-5-phosphono-3-pentenoic acid	-3.09064	-2.76599
BRD-K08255599-365-01-1	(3R)-3-(methylamino)-2,3,4,9-tetrahydro-1H-carbazole-6-carboxamide succinate hydrate	-0.334209	0.458138
BRD-K42260897-001-08-4	(3R,4S)-1-(4-fluorophenyl)-3-[(3S)-3-(4-fluorophenyl)-3-hydroxypropyl]-4-(4-hydroxyphenyl)-2-azetidinone	-3.53319	-3.41637
BRD-K78841970-001-14-6	(3S)-3-amino-4-{[(1S)-1-benzyl-2-methoxy-2-oxoethyl]amino}-4-oxobutanoic acid	-8.40607	-8.10527
BRD-K06883221-001-01-9	(3S)-N-hydroxy-4-({4-[(4-hydroxy-2-butynyl)oxy]phenyl}sulfonyl)-2,2-dimethyl-3-thiomorpholinecarboxamide	-1.80403	-0.569007
BRD-K76819217-001-02-2	(3S,11aR)-N-(2,4-difluorobenzyl)-3-methyl-5,6,7-trioxo-2,3,5,5a,6,7,11,11a-octahydrooxazolo[3,2-a]pyrido[1,2-d]pyrazine-8-carboxamide	-0.141125	0.62771
BRD-K24526313-001-18-5	(3S,4R)-3-hydroxy-2,2-dimethyl-4-(2-oxo-1-pyrrolidinyl)-3,4-dihydro-2H-chromene-6-carbonitrile	0.509635	0.75498
BRD-K77175907-001-08-0	(3S,5Z,7E)-9,10-secocholesta-5,7,10-triene-3,25-diol	3.00704	3.29847
BRD-K99498722-001-03-4	(3Z,6Z)-3-benzylidene-6-[(5-tert-butyl-1H-imidazol-4-yl)methylene]-2,5-piperazinedione	-4.45623	-3.70672
BRD-K68379918-001-01-1	(4-amino-N-(pyrimidin-2-yl)phenylsulfonamido)silver	0.856943	2.10364
BRD-A55484088-050-04-1	(4aS,7aR,12bS)-6-((E)-benzylidene)-3-(cyclopropylmethyl)-4a,9-dihydroxy-2,3,4,4a,5,6-hexahydro-1H-4,12-methanobenzofuro[3,2-e]i	-5.69816	-5.55271
BRD-A75769826-003-04-7	(4bS,8aS,14bR)-7-(2-methylallyl)-5,6,7,8,14,14b-hexahydro-4,8-methanobenzofuro[2,3-a]pyrido[4,3-b]carbazole-1,8a(9H)-diol hydro	-2.34578	-2.21945
BRD-K46209126-001-06-4	(4-methoxyphenyl){2-methyl-1-[2-(4-morpholinyl)ethyl]-1H-indol-3-yl}methanone	0.53584	0.576803
BRD-K84459715-001-01-6	(4-oxo-3-{[5-(trifluoromethyl)-1,3-benzothiazol-2-yl]methyl}-3,4-dihydro-1-phthalazinyl)acetic acid	0.433946	1.71549
BRD-K92413528-001-06-9	(4R)-2-oxo-1,3-thiazolidine-4-carboxylic acid	2.69675	3.54506
BRD-K60902958-001-01-9	(4S)-2-methyl-1,4,5,6-tetrahydro-4-pyrimidinecarboxylic acid	-1.01463	-0.223176
BRD-K79821389-001-03-5	(4S)-4-ethyl-4-hydroxy-10-nitro-1H-pyrano[3',4':6,7]indolizino[1,2-b]quinoline-3,14(4H,12H)-dione	-5.48699	-5.14038
BRD-A07600638-060-06-0	(4S,4aR,5S,5aS,12aS)-7-chloro-4-(dimethylamino)-5,10,12a-trihydroxy-6-methylene-1,3,11,12-tetraoxo-1,2,3,4,4a,5,5a,6,11,11a,12,12a-dodecahydrotetracene-2-carboxamide 2-hydroxy-5-sulfobenzoate	-0.828016	0.00833241
BRD-K03871161-001-01-9	(4S,5S)-5-hydroxy-2-methyl-1,4,5,6-tetrahydro-4-pyrimidinecarboxylic acid	-0.962716	0.0333678
BRD-K11683436-001-02-5	(5-amino-1-(2-methyl-1H-benzo[d]imidazol-6-yl)-1H-pyrazol-4-yl)(1H-indol-2-yl)methanone	-1.07141	-0.754071
BRD-K33131085-001-07-2	(5R,6S)-1-oxo-5-vinyl-5,6-dihydro-1H,3H-pyrano[3,4-c]pyran-6-yl beta-D-glucopyranoside	0.685891	0.950754
BRD-K26521938-001-09-8	(5Z,11beta,13E,15S)-11,15-dihydroxy-9-oxoprosta-5,13-dien-1-oic acid	-1.51041	-1.35529
BRD-K24452555-001-01-7	(6alpha,11beta)-21-(acetyloxy)-11-hydroxy-6-methyl-3,20-dioxopregna-1,4-dien-17-yl propionate	-2.08437	-0.80846
BRD-K71059170-341-02-5	(6R,7R)-7-({(2Z)-2-(2-amino-1,3-thiazol-4-yl)-2-[(carboxymethoxy)imino]ethanoyl}amino)-8-oxo-3-vinyl-5-thia-1-azabicyclo[4.2.0]oct-2-ene-2-carboxylic acid trihydrate	-1.3439	0.691364
BRD-K37848908-001-05-6	(6R,7R)-7-({[2-(aminomethyl)phenyl]acetyl}amino)-3-({[1-(carboxymethyl)-1H-tetraazol-5-yl]sulfanyl}methyl)-8-oxo-5-thia-1-azabicyclo[4.2.0]oct-2-ene-2-carboxylic acid	-0.337664	0.15136
BRD-K92872987-001-01-1	(6R,7R)-7-{[(2R)-2-{[(4-hydroxy-6-methyl-3-pyridinyl)carbonyl]amino}-2-(4-hydroxyphenyl)ethanoyl]amino}-3-{[(1-methyl-1H-tetraazol-5-yl)sulfanyl]methyl}-8-oxo-5-thia-1-azabicyclo[4.2.0]oct-2-ene-2-car	0.533867	0.684448
BRD-K27798832-001-01-5	(6R,7R)-7-{[(2Z)-2-(2-amino-1,3-thiazol-4-yl)-2-(methoxyimino)ethanoyl]amino}-3-methyl-8-oxo-5-thia-1-azabicyclo[4.2.0]oct-2-ene-2-carboxylic acid	-0.623165	-0.403176
BRD-K11124378-002-01-0	(6R,7R)-7-{[(2Z)-2-(2-amino-1,3-thiazol-4-yl)-4-carboxy-2-butenoyl]amino}-8-oxo-5-thia-1-azabicyclo[4.2.0]oct-2-ene-2-carboxylic acid hydrate	-0.703163	-0.560407
BRD-K18878288-001-06-4	(6S,7S)-1,2,3,13-tetramethoxy-6,7-dimethyl-5,6,7,8-tetrahydrobenzo[3',4']cycloocta[1',2':4,5]benzo[1,2-d][1,3]dioxol-6-ol	-2.00964	-1.61736
BRD-K42816473-001-01-0	(6S,7S)-7-(isopropylamino)-6,7,8,9-tetrahydro-2,9a-diazabenzo[cd]azulene-1,6-diol	0.291259	0.951338
BRD-K20152659-001-07-9	(8Z,11Z,14Z)-8,11,14-icosatrienoic acid	-1.21179	-0.697822
BRD-K40002998-001-01-5	(9aS)-8,9,9a,10-tetrahydro-5H,7H-pyrido[3,2-f]pyrrolo[2,1-c][1,4]oxazepin-5-one	-0.719692	-0.411514
BRD-A74347210-001-01-7	(9Z)-2-hydroxy-9-octadecenoic acid	-1.3283	-0.37208
BRD-K91356052-001-04-0	(9Z)-9-hexadecenoic acid	-2.58963	-1.1106
BRD-K33396764-001-11-1	(9Z,12Z,15Z)-9,12,15-octadecatrienoic acid	-2.18268	-0.599304
BRD-K62914667-001-13-9	(benzoylamino)acetic acid	-2.63899	-1.40216
BRD-K94559059-091-03-2	(benzoylamino)acetic acid compound with ethyl (2S)-2-amino-3-{4-[2-amino-6-({(1R)-1-[4-chloro-2-(3-methyl-1H-pyrazol-1-yl)phenyl]-2,2,2-trifluoroethyl}oxy)-4-pyrimidinyl]phenyl}propanoate (1:1)	-4.66655	-3.65913
BRD-K87036601-001-02-4	(E)-1,2-diazenedicarboxamide	-2.18061	-1.47616
BRD-K50590187-001-19-9	(E)-Capsaicin	0.215362	0.974
BRD-A48376327-003-01-5	(E)-N-(cyclopropylmethyl)-N-methyl-3,6-diphenylhex-5-en-3-amine hydrochloride	-3.17385	-2.45197
BRD-A63431791-001-01-9	(pivaloyloxy)methyl 3,3-dimethyl-7-oxo-4-thia-1-azabicyclo[3.2.0]heptane-2-carboxylate 4,4-dioxide	2.86965	4.45819
BRD-K80028314-303-02-6	(R)-(-)-?-Methylhistamine dihydrobromide	-1.11328	-0.566115
BRD-K76022557-003-02-7	(R)-(-)-Apomorphine hydrochloride	0.593975	0.93865
BRD-K44309363-003-02-1	(R)-(-)-Niguldipine hydrochloride	-5.66952	-5.53595
BRD-K75516118-001-04-1	(R)-(-)-Rolipram	-2.08621	-2.06655
BRD-K58046914-001-03-8	(R)-(+)-HA-966	1.36916	1.53181
BRD-K92830582-003-10-5	(R)-(+)-Propranolol hydrochloride	-3.47451	-2.65602
BRD-K34277641-001-01-2	(R)-1-(1-methyl-2-oxo-5-phenyl-2,3-dihydro-1H-benzo[e][1,4]diazepin-3-yl)-3-m-tolylurea	-1.22409	-0.904352
BRD-A30403214-001-04-1	(R)-2-methoxy-3-(octadecyloxy)propyl 2-(trimethylammonio)ethyl phosphate	-2.80425	-2.75405
BRD-K76592088-001-02-1	(R)-3-Carboxy-4-hydroxyphenylglycine	-1.53907	0.0430517
BRD-K44164034-003-01-1	(R)-7-hydroxy-N-(quinuclidin-3-yl)thieno[3,2-b]pyridine-6-carboxamide hydrochloride	1.74868	2.69118
BRD-K62353271-001-04-7	(R)-baclofen	-0.78303	-0.299881
BRD-K66094457-001-01-5	(R)-CPP	-1.19237	1.08216
BRD-K45163704-001-01-5	(R)-CPPene	0.317464	1.11133
BRD-K40331046-305-02-3	(R)-CR8	-8.04382	-5.35015
BRD-K25486274-300-02-8	(R)-DRF053 dihydrochloride	-3.44581	-3.08165
BRD-A24284985-001-09-9	(R,S)-3-(2-Piperidinyl) pyridine [(-)-Anabasine]	-1.4552	-0.00380729
BRD-A55272860-001-16-1	(RS)-(+/-)-Sulpiride	-2.97662	-2.72596
BRD-A34716233-004-03-5	(RS)-AMPA hydrobromide	-1.43572	-0.416171
BRD-A20239487-001-24-9	(RS)-Atenolol	-0.240902	0.6883
BRD-K14329163-001-03-9	(S)-(-)-Bay K 8644	-2.79333	-2.71304
BRD-K41304947-001-03-2	(S)-(-)-HA-966	-2.04874	-0.135012
BRD-K13994703-003-15-8	(S)-(-)-Propranolol hydrochloride	-3.41644	-2.25772
BRD-K51671335-001-12-2	(S)-(-)-Sulpiride	-2.61746	-2.15321
BRD-K28308851-303-01-8	(S)-(+)-?-Methylhistamine dihydrobromide	-2.46163	-1.07219
BRD-K83192048-050-02-7	(S)-(+)-Dimethindene maleate	-4.65782	-3.50546
BRD-K69907333-001-10-6	(S)-(+)-Flurbiprofen	-0.825954	0.414826
BRD-K14965640-001-13-2	(S)-(+)-Ibuprofen	-4.48885	-3.87855
BRD-K59333713-003-03-8	(S)-(+)-Niguldipine hydrochloride	-4.34592	-3.79609
BRD-K65856711-001-04-4	(S)-(+)-Rolipram	-1.03183	-0.467805
BRD-K76315403-015-02-5	(S)-1-(((R)-2-((S)-2-((S)-2-((R)-2-((R)-2-((R)-2-acetamido-3-(naphthalen-2-yl)propanamido)-3-(4-chlorophenyl)propanamido)-3-(pyridin-3-yl)propanamido)-3-hydroxypropanamido)-3-(4-hydroxyphenyl)propanam;ido)-5-ureidopentanoyl)-L-leucyl-L-arginyl)-N-((R)-1-a	1.87744	2.81739
BRD-K86309810-001-01-5	(S)-1-(1-(4-chloro-3-fluorophenyl)-2-hydroxyethyl)-4-(2-((1-methyl-1H-pyrazol-5-yl)amino)pyrimidin-4-yl)pyridin-2(1H)-one	-0.667145	-0.277796
BRD-K35304636-001-01-0	(S)-2-((2R,5S,8S,11R,14S)-5-((1H-indol-3-yl)methyl)-14-amino-2-benzyl-15-(1H-imidazol-5-yl)-8-methyl-11-((2-methyl-1H-indol-3-yl)methyl)-4,7,10,13-tetraoxo-3,6,9,12-tetraazapentadecanamido)-6-aminohex;anamide	-3.02303	-2.24093
BRD-K51041191-001-01-4	(S)-2-(3-chloro-4-cyanophenyl)-3-cyclopentyl-2,3,4,5-tetrahydro-1H-benzo[g]indazole-7-carboxylic acid	-0.106815	1.26085
BRD-K44869961-001-01-6	(S)-3-(pyridin-3-yl)propyl 1-(3,3-dimethyl-2-oxopentanoyl)pyrrolidine-2-carboxylate	-0.164996	0.53584
BRD-K61585876-001-01-0	(S)-3-Carboxy-4-hydroxyphenylglycine	-0.842317	0.028994
BRD-K52681925-050-01-6	(S)-3-ethynyl-5-(1-methylpyrrolidin-2-yl)pyridine maleate	-0.756945	-0.274084
BRD-K09126848-003-02-7	(S)-5-(aminomethyl)-1-(5,7-difluoro-1,2,3,4-tetrahydronaphthalen-2-yl)-1H-imidazole-2-thiol hydrochloride	-1.01026	-0.986792
BRD-K92493880-001-03-0	(S)-AMPA	-0.27459	0.235173
BRD-K40308497-001-01-2	(S)-crizotinib	-8.6585	-7.88562
BRD-K71103788-003-13-8	(S)-Duloxetine hydrochloride	-5.02601	-4.50671
BRD-K73451719-001-01-2	(S)-N-((S)-6-amino-1-(2-amino-2-oxoethylamino)-1-oxohexan-2-yl)-1-((4R,7S,10S,13S,16S,19R)-7-(2-amino-2-oxoethyl)-10-(3-amino-3-oxopropyl)-19-(2-(2-(2-aminoacetamido)acetamido)acetamido)-13-benzyl-16-;(4-hydroxybenzyl)-6,9,12,15,18-pentaoxo-1,2-dithia-5,8	0.70086	2.33946
BRD-K37708699-001-01-4	(Z)-2-(5-fluoro-2-methyl-1-(4-(methylsulfonyl)benzylidene)-1H-inden-3-yl)acetic acid	-0.751467	-0.0435266
BRD-K87349602-001-03-8	?-CCB	0.446453	0.550398
BRD-K95110148-003-02-3	?-Funaltrexamine hydrochloride	-0.716915	-0.585698
BRD-K19515365-001-02-6	[(1-benzyl-1H-indazol-3-yl)oxy]acetic acid	-1.07577	-0.746798
BRD-K27515606-311-02-8	[(2,2-dimethylpropanoyl)oxy]methyl (6R,7R)-3-{[(aminocarbonyl)oxy]methyl}-7-{[(2Z)-2-(2-amino-1,3-thiazol-4-yl)-2-pentenoyl]amino}-8-oxo-5-thia-1-azabicyclo[4.2.0]oct-2-ene-2-carboxylate hydrochloride; hydrate	-2.64852	-0.253616
BRD-A85295731-001-05-6	[(2-sulfanylpropanoyl)amino]acetic acid	-2.37685	-0.228171
BRD-K77484724-001-03-8	[2-(6-amino-9H-purin-9-yl)ethoxy]methylphosphonic acid	-2.29947	-1.89673
BRD-K34098590-001-02-1	[2,3-dichloro-4-(2-thienylcarbonyl)phenoxy]acetic acid	1.42636	4.3142
BRD-K49372556-001-04-1	[3,4-bis(4-methoxyphenyl)-5-isoxazolyl]acetic acid	-0.683352	-0.313858
BRD-K26813177-001-03-2	[4-(2-{[(4-chlorophenyl)sulfonyl]amino}ethyl)phenyl]acetic acid	-0.813723	-0.321355
BRD-K47492008-001-02-7	[4-(allyloxy)-3-chlorophenyl]acetic acid	-0.459946	-0.42689
BRD-K26556907-001-01-8	[4-(benzyloxy)-3-chlorophenyl]acetic acid	-1.68658	-0.349636
BRD-A38218502-001-01-2	[Met5]-ENKEPHALIN	-2.16915	-1.87005
BRD-A86665761-001-01-1	{1-[({[1-(isobutyryloxy)ethoxy]carbonyl}amino)methyl]cyclohexyl}acetic acid	-2.01482	-1.61123
BRD-K66437909-001-01-0	{4-[(2-ethyl-1-benzofuran-3-yl)carbonyl]phenoxy}acetic acid	-1.90112	-0.705342
BRD-K63533170-001-03-7	{6-iodo-2-methyl-1-[2-(4-morpholinyl)ethyl]-1H-indol-3-yl}(4-methoxyphenyl)methanone	-1.83779	-1.6046
BRD-K85764479-003-01-0	1-((3r,5r,7r)-adamantan-1-yl)-2-methylpropan-2-amine hydrochloride	-5.8138	-4.29548
BRD-K88956297-003-01-9	1-((Z)-3-Chloroallyl)-1,3,5,7-tetraazaadamantan-1-ium chloride	-2.45453	-1.90963
BRD-K99077012-001-01-9	1-(1-benzofuran-2-ylcarbonyl)-4-benzylpiperazine	-1.44117	-1.1101
BRD-K86171477-001-01-3	1-(2,3-dihydro-1,4-benzodioxin-5-yl)piperazine	-0.682512	1.19399
BRD-A95802703-001-01-0	1-(2-chloro-5-methylphenoxy)-3-(isopropylamino)-2-propanol	-2.96306	-2.81015
BRD-A15687940-001-05-6	1-(2-chlorophenyl)-3-(dimethylamino)-1-phenyl-1-propanol	-2.45045	-2.26465
BRD-K50293352-001-01-7	1-(2-METHOXYPHENYL)-4-(4-SUCCINIMIDOBUTYL)PIPERAZINE	-2.78522	-2.39981
BRD-A21474126-001-01-6	1-(2-methoxyphenyl)-N-methyl-2-propanamine	-2.86146	-2.45045
BRD-K87024524-001-04-0	1-(2-phenylethyl)hydrazine	-3.09664	-3.02831
BRD-K53405000-001-02-8	1-(3-(tert-butyl)-1-(p-tolyl)-1H-pyrazol-5-yl)-3-(5-fluoro-2-((1-(2-hydroxyethyl)-1H-indazol-5-yl)oxy)benzyl)urea	-4.72448	-3.63516
BRD-K38385169-001-04-5	1-(3,3-dimethylbutyl)-3-(2-fluoro-4-methyl-5-(7-methyl-2-(methylamino)pyrido[2,3-d]pyrimidin-6-yl)phenyl)urea	-2.51039	-1.49506
BRD-A56241705-003-01-2	1-(3,4,5-trimethoxybenzyl)-1,2,3,4-tetrahydro-6,7-isoquinolinediol hydrochloride	-0.288764	-0.25061
BRD-A68942014-003-01-7	1-(3,4-Dichloro-phenyl)-3-aza-bicyclo[3.1.0]hexane HCl	-3.91491	-3.11955
BRD-A26105646-001-06-1	1-(3,4-dihydroxy-5-(hydroxymethyl)tetrahydrofuran-2-yl)pyridine-2,4(1H,3H)-dione	-2.24144	-2.11467
BRD-K48888725-001-02-7	1-(3-amino-2-methylbenzyl)-4-[2-(2-thienyl)ethoxy]-2(1H)-pyridinone	-1.37276	-0.768616
BRD-A08316590-001-01-3	1-(3-bromo-5-isoxazolyl)-2-(tert-butylamino)ethanol	0.0569165	2.19212
BRD-K75844781-003-08-0	1-(3-Chlorophenyl)piperazine	-3.4157	-2.80338
BRD-K07400595-001-02-7	1-(4-(((2S,4R)-2-((1H-1,2,4-triazol-1-yl)methyl)-2-(2,4-dichlorophenyl)-1,3-dioxolan-4-yl)methoxy)phenyl)-4-isopropylpiperazine	-2.22443	-1.91768
BRD-K50010139-001-02-3	1-(4-((4-((3,4-dichloro-2-fluorophenyl)amino)-7-methoxyquinazolin-6-yl)oxy)piperidin-1-yl)prop-2-en-1-one	3.79057	4.12027
BRD-K48195801-001-01-6	1-(4-fluorobenzyl)-N-(piperidin-4-yl)-1H-benzo[d]imidazol-2-amine	-4.34283	-2.16507
BRD-K75052463-001-01-4	1-(4-fluorophenyl)-4-(3,4,5-trimethoxybenzyl)piperazine	-2.71796	-2.32857
BRD-A55204514-003-01-2	1-(4-hydroxybenzyl)-1,2,3,4-tetrahydro-6,7-isoquinolinediol hydrochloride	-4.96715	-4.84133
BRD-K41267922-001-01-4	1-(4-hydroxyphenyl)-5-methyl-2(1H)-pyridinone	-2.20662	-2.17694
BRD-A91444184-300-01-9	1-(4-tert-butylbenzyl)-4-[(4-chlorophenyl)(phenyl)methyl]piperazine dihydrochloride	-2.86461	-2.79206
BRD-A50675490-001-01-0	1-(9H-carbazol-4-yloxy)-3-(isopropylamino)-2-propanol	-1.93688	-1.61587
BRD-A73566563-001-01-6	1-(isopropylamino)-3-[2-(methylsulfanyl)phenoxy]-2-propanol	-0.036485	2.77243
BRD-A21446384-001-01-1	1-(tert-butylamino)-3-(2,3-dimethylphenoxy)-2-propanol	-3.11095	-1.11564
BRD-A04971881-003-01-3	1-(tert-butylamino)-3-(2,5-dichlorophenoxy)-2-propanol hydrochloride	-0.652125	-0.641346
BRD-A48420483-001-02-3	1-(tert-butylamino)-3-(2-chloro-5-methylphenoxy)-2-propanol	-1.81111	-0.00145077
BRD-K05638300-001-02-0	1,1,1,3,3,3-hexafluoro-2-(fluoromethoxy)propane	-2.09646	-1.83141
BRD-K39495750-001-02-0	1,1,1-trichloro-2-methyl-2-propanol	-2.51719	-2.2987
BRD-K14763542-001-03-1	1,1,1-trifluoro-2-(2,2,2-trifluoroethoxy)ethane	-0.495128	-0.186019
BRD-K46435528-001-05-1	1,1,2-trichloroethylene	-1.81285	-0.372158
BRD-A89207210-001-01-6	1,1-diethyl-3-((9S)-7-methyl-4,6,6a,7,8,9,10,10a-octahydroindolo[4,3-fg]quinolin-9-yl)urea	0.158632	0.343669
BRD-A09368919-001-01-7	1,2-diphenyl-2-propanamine	-1.73226	-1.47946
BRD-K41853443-001-02-9	1,3-Dipropyl-8-phenylxanthine	-1.36536	-1.02012
BRD-A41385909-001-02-1	1,7,7-trimethylbicyclo[2.2.1]hept-2-yl acetate	-1.47003	-1.36412
BRD-A11725667-001-01-8	1-[(1-ethynylcyclohexyl)oxy]-3-{4-[3-(trifluoromethyl)phenyl]-1-piperazinyl}-2-propanol	-0.13239	-0.0740889
BRD-K43647122-001-01-3	1-[(5-methyl-4-isoxazolyl)carbonyl]piperidine	-0.973868	-0.888266
BRD-A42423104-001-01-4	1-[2-(2-benzylphenoxy)-1-methylethyl]piperidine	-2.04536	-1.49223
BRD-K65900713-003-01-0	1-[2-(diethylamino)ethyl]-3-(4-methoxybenzyl)-2(1H)-quinoxalinone hydrochloride	-0.250893	2.09894
BRD-A62197763-001-01-1	1-[4-(2-methoxyphenyl)-1-piperazinyl]-3-(3,4,5-trimethoxyphenoxy)-2-propanol	-2.24684	-1.77713
BRD-A13116749-003-01-6	1-[4-amino-3-chloro-5-(trifluoromethyl)phenyl]-2-(tert-butylamino)ethanol hydrochloride	-4.37688	-2.78066
BRD-K07409305-001-01-1	1-[6-chloro-5-(trifluoromethyl)-2-pyridinyl]piperazine	-1.72653	-1.19042
BRD-K84971356-001-01-4	1-{2-[2-(diethylamino)ethoxy]phenyl}-3-phenyl-1-propanone	-4.72465	-4.36416
BRD-A27274504-001-01-6	1-{2-[3-(tert-butylamino)-2-hydroxypropoxy]-5-fluorophenyl}-1-butanone	-2.71667	-1.95507
BRD-A42881122-001-01-1	10-[3-(dimethylamino)-2-methylpropyl]-10H-phenothiazine-2-carbonitrile	-5.98856	-5.53764
BRD-K77564118-001-03-1	10-{[4-(1,3-benzodioxol-5-ylmethyl)-1-piperazinyl]acetyl}-10H-phenothiazine	-2.30149	-2.06161
BRD-K49460120-001-05-8	10058-F4	-4.352	-3.9991
BRD-K96631475-001-02-4	10-DAB (10-Deacetylbaccatin)	-3.60257	-3.13346
BRD-K96631475-001-03-2	10-Deacetylbaccatin III	-2.76599	-2.65432
BRD-K70792160-003-06-1	10-DEBC hydrochloride	-7.30937	-4.56388
BRD-K63784565-001-06-2	10-Hydroxycamptothecin	-5.37091	-5.07893
BRD-K19189338-001-05-7	10-Undecenoic acid	-0.16719	-0.101886
BRD-K55991142-001-01-6	11-(1-methyl-4-piperidinylidene)-6,11-dihydro-5H-imidazo[2,1-b][3]benzazepine-3-carbaldehyde	-2.40322	-2.0287
BRD-K66898851-003-03-3	13-methyl[1,3]benzodioxolo[5,6-c][1,3]dioxolo[4,5-i]phenanthridin-13-ium chloride	-6.10777	-5.66883
BRD-K30237152-300-02-5	1400W dihydrochloride	-3.20354	-1.91565
BRD-K92301463-001-05-5	16,16-Dimethyl-prostaglandin E2	-2.93547	-1.9422
BRD-K43736954-001-22-3	17,21-dihydroxypregn-4-ene-3,20-dione	-0.621552	0.274993
BRD-K81473043-001-14-6	17-AAG (Tanespimycin)	-4.50656	-3.89867
BRD-K83988098-001-02-0	17-DMAG (Alvespimycin) HCl	0.797948	1.24879
BRD-K83988098-003-03-4	17-DMAG HCl (Alvespimycin)	-6.0833	-6.05566
BRD-K96055017-003-02-7	1-Acetyl-4-methylpiperazine hydrochloride	1.22215	2.20325
BRD-K66465025-001-05-1	1-Aminocyclopropanecarboxylic acid	1.11861	1.78058
BRD-K03273112-001-01-8	1-Azakenpaullone	2.85229	4.59535
BRD-K25140590-001-03-0	1-BCP	-1.11905	-0.874574
BRD-K12742203-003-01-7	1-benzyl-3-ethyl-6,7-dimethoxyisoquinoline hydrochloride	1.82442	3.09895
BRD-K92988025-001-02-7	1-bromo-1,1,2,2,3,3,4,4,5,5,6,6,7,7,8,8,8-heptadecafluorooctane	-2.87803	-2.26164
BRD-K89665618-003-02-5	1-Deoxymannojirimycin hydrochloride	0.172551	0.608266
BRD-K70586315-001-03-2	1-EBIO	-1.36382	-1.01893
BRD-K08288352-001-03-6	1-Ethyl-2-pyrrolidone	0.771559	1.29677
BRD-K57427145-001-01-6	1-ethyl-3-methyl-8-phenyl-4,6-dihydropyrazolo[4,3-e][1,4]diazepin-5(1H)-one	-0.761491	-0.716187
BRD-K49841478-001-01-6	1-ethyl-4-oxo-7-(4-pyridinyl)-1,4-dihydro-3-quinolinecarboxylic acid	0.885328	1.96076
BRD-K37203094-001-03-3	1-Hexadecanol	-2.90402	-2.49815
BRD-K54339150-001-01-8	1-isopropyl-7-methyl-4-phenyl-2(1H)-quinazolinone	-0.754311	-0.363386
BRD-A16263897-001-06-6	1-methoxy-3-(2-nitro-1H-imidazol-1-yl)-2-propanol	-2.43379	-2.25305
BRD-K91234829-001-01-7	1-methyl-4-(1-naphthoyl)-1H-pyrrole-2-carboxylic acid	-0.986792	-0.970953
BRD-K91244729-003-01-3	1-methyl-4-piperidinyl diphenyl(propoxy)acetate hydrochloride	-4.5394	-3.74407
BRD-K29542628-001-04-7	1-Naphthyl PP1	-0.549377	0.190655
BRD-A30403214-001-02-5	1-OCTADECYL-2-METHYLGLYCERO-3 PC	-1.5138	-1.24511
BRD-K09338665-001-08-9	1-octanol	-1.34226	-0.864041
BRD-A44181516-001-01-8	1-phenyl-1-[3-(trifluoromethyl)phenyl]-1-propanol	-0.315826	0.616802
BRD-K31491153-003-05-9	1-Phenylbiguanide hydrochloride	-0.859015	0.389057
BRD-K27853494-003-04-7	1S,2R-PHENYLPROPANOLAMINE HYDROCHLORIDE	-3.81029	-3.19047
BRD-A43974499-066-02-9	2-((2-ethoxyphenoxy)(phenyl)methyl)morpholine methanesulfonate	-0.383172	0.221378
BRD-K25075681-001-02-0	2-({[1-(7-chloro-4-quinolinyl)-5-(2,6-dimethoxyphenyl)-1H-pyrazol-3-yl]carbonyl}amino)-2-adamantanecarboxylic acid	-0.656492	0.507714
BRD-K23106423-001-01-0	2-({5-amino-2-[({1-[6-amino-2-({[1-(2-amino-5-{[amino(imino)methyl]amino}pentanoyl)-2-pyrrolidinyl]carbonyl}amino)hexanoyl]-2-pyrrolidinyl}carbonyl)amino]-5-oxopentanoyl}amino)-N~1~-[13-(aminocarbonyl;)-1,4-dibenzyl-10-isobutyl-2,5,8,11-tetraoxo-16-thia-3	-1.48327	-0.989258
BRD-K90727284-001-05-0	2-(1-azepanyl)-N-(2,6-dimethylphenyl)acetamide	-2.46196	-1.89673
BRD-K34251960-036-01-6	2-(2,2-diphenylcyclopropyl)-4,5-dihydro-1H-imidazole succinate	-2.45305	-2.10553
BRD-K92129045-001-01-6	2-(2-oxo-2H-1,3-benzoxazin-3(4H)-yl)acetamide	-1.80987	-0.567641
BRD-K84883208-001-01-1	2-(4-(2-(1H-imidazol-1-yl)ethoxy)phenyl)ethan-1-ol	-1.89673	-1.10404
BRD-K44993696-001-13-1	2-(4-{[(2S)-2-hydroxy-3-(isopropylamino)propyl]oxy}phenyl)acetamide	-1.22476	-1.09605
BRD-K54093161-001-01-8	2-(4-chlorophenyl)-1H-pyrazolo[4,3-c]quinolin-3(2H)-one	-1.50379	-0.877704
BRD-A46136514-001-01-2	2-(4-isobutylphenyl)butanoic acid	-2.70569	-1.78776
BRD-K35882976-001-04-7	2-(4-oxo-2-phenyl-4H-chromen-8-yl)acetic acid	-2.10501	-1.28855
BRD-A72988804-001-11-1	2-(5-benzoyl-2-thienyl)propanoic acid	-1.11329	-0.97726
BRD-K45385835-001-03-2	2-(6-chloro-5-{[4-(4-fluorobenzyl)-1-piperidinyl]carbonyl}-1-methyl-1H-indol-3-yl)-N,N-dimethyl-2-oxoacetamide	-2.88183	-2.76052
BRD-A14574269-051-03-0	2-(6-chloropyridin-3-yl)-9-azabicyclo[4.2.1]non-2-ene fumarate	-1.45445	-1.40511
BRD-K22588750-001-07-0	2-(7-bromo-2-oxo-5-phenyl-2,3-dihydro-1H-1,4-benzodiazepin-1-yl)acetohydrazide	-4.21339	-3.81089
BRD-A94965935-001-01-6	2-(9H-fluoren-2-yl)propanoic acid	-0.617898	0.158761
BRD-K86864073-001-01-1	2-(diethylamino)ethyl 4-amino-2-chlorobenzoate	-2.33259	-1.77023
BRD-A92448440-001-01-3	2-(dimethylamino)-1-[2-(3-ethyl-5-methyl-4-isoxazolyl)-1H-indol-3-yl]ethanol	-2.01763	-1.26583
BRD-A09004963-001-01-3	2-(hydroxymethyl)-2-(methoxymethyl)quinuclidin-3-one	-2.42601	-2.13699
BRD-K63651590-001-01-3	2-(hydroxymethyl)pyrazolo[1,5-c]quinazolin-5(6H)-one	0.584353	0.711022
BRD-A21280314-001-06-8	2-(isopropylamino)-1-(4-nitrophenyl)ethanol	-1.26973	-0.973868
BRD-K07449869-001-01-5	2,2,5,7,8-pentamethyl-6-chromanol	-2.09056	-2.0057
BRD-K43890836-001-01-6	2,2,9,9-tetramethyl-1,10-decanediol	-1.7888	-0.775913
BRD-K15318909-001-12-1	2,2-bis(hydroxymethyl)quinuclidin-3-one	-3.34532	-3.20283
BRD-K06152156-001-02-6	2,2-dichloro-1,1-difluoro-1-methoxyethane	-2.89429	-2.4408
BRD-K30930903-001-01-3	2,2-dichloro-N-{8-[(dichloroacetyl)amino]octyl}acetamide	-2.76164	-1.79404
BRD-K44963273-001-07-7	2,2-dimethylbutanoic acid	-2.19931	-1.92979
BRD-K62326629-001-20-8	2,2'-methylenebis(4-chlorophenol)	-2.36137	-2.09921
BRD-K61734568-003-02-1	2,3-DCPE hydrochloride	-6.01957	-5.33057
BRD-A23418262-001-01-5	2,3-dihydroxypropyl 2-{[8-(trifluoromethyl)-4-quinolinyl]amino}benzoate	1.88749	3.13706
BRD-A10773072-001-03-4	2,3-dihydroxypropyl laurate	-1.15406	-0.848663
BRD-A56152450-001-03-8	2,3-disulfanyl-1-propanol	-2.78785	-1.80662
BRD-K21910317-001-12-3	2,4-DINITROPHENOL	-1.74615	-0.460298
BRD-K95941975-001-01-5	2,5-piperazinedione	0.384081	0.55331
BRD-K82255054-001-17-5	2,6-diisopropylphenol	-1.08014	-0.204995
BRD-K85804405-003-01-3	2,6-ditert-butyl-4-[(ethylamino)methyl]phenol hydrochloride	-6.24099	-3.5305
BRD-K75167327-001-01-6	2-[(1-adamantylcarbonyl)amino]benzoic acid	1.55524	1.86229
BRD-A59747053-003-01-3	2-[(1H-inden-7-yloxy)methyl]morpholine hydrochloride	-2.12442	-1.00831
BRD-K79753741-001-03-3	2-[(3-[(2S)-2-amino-2-carboxyethyl]-2,6-dioxo-3,6-dihydro-1(2H)-pyrimidinyl)methyl]benzoic acid	-2.81015	-1.93799
BRD-K24221957-003-01-6	2-[(E)-(hydroxyimino)methyl]-1-methylpyridinium chloride	0.123481	0.83957
BRD-K42991124-001-04-8	2-[[amino(imino)methyl](methyl)amino]ethyl dihydrogen phosphate	-2.75093	-1.69751
BRD-K91868854-001-03-6	2-[1-(4-Piperonyl)piperazinyl]benzothiazole	-1.60623	-1.54388
BRD-K96206066-001-07-9	2-[1,1'-biphenyl]-4-yl-N-(2-pyridinyl)acetamide	-2.06111	-2.00792
BRD-K45125084-001-01-4	2-[4-(methylsulfonyl)phenyl]imidazo[1,2-a]pyridine	-1.65013	-1.28287
BRD-K66896751-001-02-4	2-[6-chloro-2-(4-chlorophenyl)imidazo[1,2-a]pyridin-3-yl]-N,N-dipropylacetamide	-2.56358	-1.67581
BRD-K04643877-001-03-2	2-[8,9-dioxo-2,6-diazabicyclo[5.2.0]non-1(7)-en-2-yl]ethylphosphonic acid	0.35633	0.889827
BRD-K14590126-001-01-6	2-{[(2E,6E)-3,7,11-trimethyl-2,6,10-dodecatrienyl]sulfanyl}benzamide	-1.34656	-1.11406
BRD-K08998509-001-03-2	2-{3-[4-(4-fluorophenyl)-1-piperazinyl]propyl}-2H-naphtho[1,8-cd]isothiazole 1,1-dioxide	-0.917703	-0.708902
BRD-K44184170-001-01-7	2-{4-[(1Z)-4-chloro-1,2-diphenyl-1-butenyl]phenoxy}ethanol	-0.285959	1.3083
BRD-K28639661-001-01-6	2-{4-[(2-phenyl-1H-imidazol-5-yl)methyl]-1-piperazinyl}pyrimidine	1.84586	2.55363
BRD-K11244467-001-09-3	2-{4-[(aminocarbothioyl)hydrazono]-2,5-cyclohexadien-1-ylidene}hydrazinecarboximidamide	-3.65411	-3.31503
BRD-K34657753-001-01-9	2-{4-[2-(3,4-dichlorophenyl)ethyl]anilino}benzoic acid	-1.04957	-0.717708
BRD-K28343777-001-01-6	20-Hydroxyecdysone	-0.108271	1.16358
BRD-K02965577-001-02-6	24,25-DIHYDROXYVITAMIN D3	-2.53002	-2.12736
BRD-A04649065-001-01-7	2-amino-3-methyl-N-[2-(4-morpholinyl)ethyl]pentanamide	1.16217	6.86941
BRD-K36636143-001-01-0	2-amino-6-methyl-5-(4-pyridinylsulfanyl)-4(3H)-quinazolinone	-3.02735	-2.54586
BRD-K32681104-001-11-6	2-Aminobenzenesulfonamide	-0.753899	-0.344009
BRD-K22745370-003-02-3	2-BFI hydrochloride	-1.50349	-0.86719
BRD-K23533833-001-01-9	2-butyl-4-chloro-1-{[2'-(1H-tetraazol-5-yl)[1,1'-biphenyl]-4-yl]methyl}-1H-imidazole-5-carboxylic acid	-0.673962	-0.212267
BRD-A31564021-001-02-6	2-chloro-2-(difluoromethoxy)-1,1,1-trifluoroethane	-3.44904	-3.12124
BRD-K70088346-001-02-4	2-Chloro-N6-cyclopentyladenosine	-3.23016	-2.71152
BRD-K84075000-001-05-5	2-Chloropyrazine	-2.61042	-1.68035
BRD-K52396582-001-06-7	2-Cl-IB-MECA	-0.448779	-0.0319227
BRD-K92588747-051-02-7	2-CMDO	-2.65668	-2.60446
BRD-K34411947-001-14-1	2-deoxy-2-{[(1-methyl-2-oxohydrazino)carbonyl]amino}-alpha-D-glucopyranose	-0.371174	-0.129119
BRD-K91822704-003-07-2	2'-Deoxycytidine (hydrochloride)	0.166871	0.589836
BRD-K97808269-001-02-7	2-Deoxyglucose	-0.158595	0.631347
BRD-K04843302-001-02-5	2-ethoxybenzoic acid	0.700436	1.76748
BRD-A55455283-001-02-1	2-ethyl-1,3-hexanediol	-2.38006	-2.33696
BRD-K77087341-001-02-4	2-hydroxy-1-(hydroxymethyl)ethyl (9Z)-9-octadecenoate	1.31133	1.55347
BRD-K15045219-001-01-8	2-hydroxy-5-[(4-{[(6-methoxy-3-pyridazinyl)amino]sulfonyl}phenyl)diazenyl]benzoic acid	-2.23532	-1.28946
BRD-A31575449-066-07-8	2-hydroxy-5-{2-[(2-hydroxy-3-{4-[1-methyl-4-(trifluoromethyl)-1H-imidazol-2-yl]phenoxy}propyl)amino]ethoxy}benzamide methanesulfonate	-0.459954	0.074998
BRD-K41866823-001-01-3	2-Hydroxyethyl salicylate	-2.43901	-1.44874
BRD-K97799481-205-02-7	2-hydroxy-N,N,N-trimethylethanaminium 1,3-dimethyl-2,6-dioxo-1,2,3,6-tetrahydropurin-7-ide	2.30379	3.66117
BRD-K85402309-043-01-9	2-hydroxypropanoic acid compound with 4-amino-5-fluoro-3-[6-(4-methyl-1-piperazinyl)-1H-benzimidazol-2-yl]-2-quinolinol (1:1)	-9.01924	-7.64669
BRD-A27924917-001-03-3	2-Hydroxysaclofen	-0.04504	0.678618
BRD-K25649279-001-02-0	2-Iodomelatonin	-2.32887	-1.44865
BRD-K63932022-001-02-3	2'-MeCCPA	-2.04915	-0.896908
BRD-K44408410-001-21-8	2-Methoxyestradiol	-5.71087	-3.67136
BRD-K44408410-001-22-6	2-Methoxyestradiol (2-MeOE2)	-4.55164	-2.84882
BRD-K00739965-001-01-9	2-methoxyphenyl 2-(acetyloxy)benzoate	0.0379428	0.0968156
BRD-K68534611-001-07-8	2-methyl-1H-imidazole	-0.651378	-0.291605
BRD-K93502141-001-02-4	2-methyl-2-butanol	-0.971387	-0.642693
BRD-A38706605-001-01-2	2-methyl-3-oxoandrostan-17-yl propionate	0.80834	1.91766
BRD-K64137799-003-01-7	2-Methyl-5-hydroxytryptamine hydrochloride	-2.39565	-2.29597
BRD-A51407134-001-02-7	2-octyl-1-dodecanol	-2.02166	-1.68931
BRD-A51407134-001-01-9	2-Octyldodecan-1-ol	-1.69391	-1.40958
BRD-K61279411-001-03-8	2-oxosuccinic acid	-2.6886	-1.95711
BRD-K41869275-001-03-6	2-Phenylmelatonin	-3.30247	-3.00281
BRD-A04661934-001-02-9	2-PMDQ	-0.216527	0.797481
BRD-K23922020-075-03-7	2-propynyl 1-methyl-1,2,5,6-tetrahydro-3-pyridinecarboxylate 4-methylbenzenesulfonate	-2.56377	-2.21489
BRD-K92581468-001-01-6	2-pyridinyl[7-(4-pyridinyl)pyrazolo[1,5-a]pyrimidin-3-yl]methanone	1.68992	2.63448
BRD-A75224450-001-02-4	2-pyridinylmethyl 2-(4-isobutylphenyl)propanoate	-3.18685	-2.73719
BRD-K17874705-300-04-0	2-Pyridylethylamine dihydrochloride	-2.42018	-2.2752
BRD-K89072800-001-01-8	2-TEDC	-0.813535	0.549461
BRD-K58819470-001-05-9	2-THIOURACIL	-1.458	-0.543987
BRD-A34603619-001-01-9	3-({[1-(4-chlorobenzoyl)-5-methoxy-2-methyl-1H-indol-3-yl]acetyl}oxy)-2-phenylpropanoic acid	-2.07715	-0.540816
BRD-K60762818-003-26-0	3-(10,11-dihydro-5H-dibenzo[b,f]azepin-5-yl)-N-methyl-1-propanamine hydrochloride	-7.56139	-6.87069
BRD-K64137799-003-03-3	3-(2-aminoethyl)-2-methyl-1H-indol-5-ol hydrochloride	-2.8382	-2.52005
BRD-K35367061-001-01-1	3-(3-(2-carboxyethyl)-4-{[(5E)-6-(4-methoxyphenyl)-5-hexenyl]oxy}benzoyl)benzoic acid	-2.14436	-2.12348
BRD-K38370968-001-01-6	3-(4-ALLYLPIPERAZIN-1-YL)-2-QUINOXALINECARBONITRILE	-2.3676	-2.3069
BRD-A55464252-001-01-2	3-(4-Methylbenzylidene)camphor, 99+%	1.87479	2.99823
BRD-A65145453-001-07-9	3-(5-tert-butyl-3-hydroxy-4-isoxazolyl)alanine	-0.622335	-0.421346
BRD-K38527262-300-01-0	3-(8,8-dipropyl-2-azaspiro[4.5]decan-2-yl)-N,N-diethylpropan-1-amine dihydrochloride	-6.0573	-5.56232
BRD-K26262077-001-01-7	3-(acetylamino)-1-propanesulfonic acid	-2.40188	-1.84507
BRD-K99241550-001-04-3	3-(acetylamino)-5-[acetyl(methyl)amino]-2,4,6-triiodobenzoic acid	-2.92858	-2.71134
BRD-K92902018-001-01-9	3,20-dioxopregn-4-en-17-yl acetate	-2.5322	-1.50063
BRD-K26024145-001-01-9	3,20-dioxopregn-4-en-21-yl pivalate	-2.11985	-1.77424
BRD-K92908289-001-01-8	3,3,14,14-tetramethylhexadecanedioic acid	-0.72404	-0.172567
BRD-A15397381-001-03-3	3,3'-disulfanediylbis(2-aminopropanoic acid)	-1.85327	-1.8035
BRD-K35798650-001-01-4	3,6,9,12,15,18,21,24,27-nonaoxanonatriacontan-1-ol	-2.10518	-1.252
BRD-K47169076-003-01-6	3,6-diamino-9-(2-(methoxycarbonyl)phenyl)xanthylium chloride	-2.52142	-1.95404
BRD-A85216385-003-02-4	3?-Bis-(4-fluorophenyl) methoxytropane hydrochloride	-7.77176	-6.6276
BRD-K90065682-300-03-4	3-[(2S)-2-azetidinylmethoxy]-5-iodopyridine dihydrochloride	-2.91611	-2.46813
BRD-K11256763-001-01-5	3-[(3-pyridinylcarbonyl)oxy]-2,2-bis{[(3-pyridinylcarbonyl)oxy]methyl}propyl nicotinate	-2.12943	-1.75729
BRD-K64973364-001-01-4	3-[2-(4-piperidinyl)ethyl]-1H-indole	-5.1633	-4.57573
BRD-A50016482-001-01-7	3-[2-(ethylamino)propyl]-1,2,3,4-tetrahydro-5H-chromeno[3,4-c]pyridin-5-one	0.224085	0.496532
BRD-K07070922-001-01-4	3-[4-(2-hydroxyethyl)-1-piperazinyl]-7-(6-methoxy-3-pyridinyl)-1-(2-propoxyethyl)pyrido[3,4-b]pyrazin-2(1H)-one	-2.19795	-2.08973
BRD-K82484965-003-04-3	3-[4-(4-phenyl-3,6-dihydro-1(2H)-pyridinyl)butyl]-1H-indole-5-carboxylic acid hydrochloride	-1.13951	-0.652125
BRD-K73027814-003-01-0	3-{[(1S,2R)-2-hydroxy-1-methyl-2-phenylethyl]amino}-1-(3-methoxyphenyl)-1-propanone hydrochloride	-5.73613	-3.84861
BRD-K05528470-305-03-0	3-{[4-(4-chlorophenyl)-1-piperazinyl]methyl}-1H-pyrrolo[2,3-b]pyridine trihydrochloride	-3.21415	-3.01584
BRD-A18992208-003-02-7	3-{2-[(3,3-diphenylpropyl)(methyl)amino]-1,1-dimethylethyl} 5-methyl 2,6-dimethyl-4-(3-nitrophenyl)-1,4-dihydro-3,5-pyridinedicarboxylate hydrochloride	0.399884	1.69566
BRD-K33133047-001-01-8	3-{2-[4-(2-methylphenyl)-1-piperazinyl]ethyl}-5,6,7,8-tetrahydro[1,2,4]triazolo[4,3-a]pyridine	-0.813535	-0.184696
BRD-A43598550-001-09-4	3-alpha-Hydroxy-5-beta-androstan-17-one	0.415715	1.46756
BRD-K31329721-001-08-2	3-aminobenzo[g]quinazolin-4(3H)-one	3.15142	3.27753
BRD-A00055058-001-01-0	3-benzoyl-N-(1-phenylethyl)thiazolidine-4-carboxamide	-0.136497	0.592538
BRD-K24689407-001-07-1	3-Bromo-7-nitroindazole	-1.92713	-1.41279
BRD-A51713165-003-02-6	3-CPMT	-5.45609	-5.3839
BRD-A79431551-001-01-1	3-Deazaadenosine	-0.612461	2.85367
BRD-K77791657-001-01-1	3-Deazaneplanocin A (DZNeP)	0.918927	0.938058
BRD-K77791657-003-01-7	3-deazaneplanocin A (DZNeP) HCl	-1.93839	-1.00043
BRD-K68453341-001-01-1	3-ethyl-1-propyl-8-{1-[3-(trifluoromethyl)benzyl]-1H-pyrazol-4-yl}-3,7-dihydro-1H-purine-2,6-dione	-1.67331	-0.702075
BRD-A30205217-001-12-0	3-ethyl-5-phenyl-2,4-imidazolidinedione	-1.59819	-1.10611
BRD-K45662124-050-02-3	3'-Fluorobenzylspiperone maleate	-4.77578	-4.52924
BRD-A66143912-001-01-1	3-hydroxy-3-phenylpentanamide	-2.59045	-1.15222
BRD-K76204040-001-03-8	3-hydroxy-5-(hydroxymethyl)-2-methylisonicotinaldehyde	-1.14984	-1.01551
BRD-K43187796-001-02-3	3-Indolebutyric acid (IBA)	-3.5627	-2.24549
BRD-K81647657-001-04-3	3-Methyladenine	0.983442	1.47225
BRD-K62581435-001-03-8	3-MPPI	0.79635	1.00366
BRD-K35007173-001-07-5	3-N-Propylxanthine	0.271139	0.670299
BRD-K87573013-001-01-0	3-oxo-3-phenylpropanenitrile	-0.972247	-0.949116
BRD-A79769222-001-01-3	3-phenyl-3-[4-(trifluoromethyl)phenoxy]-1-propanamine	-2.98001	-2.4013
BRD-K58413118-001-01-8	3PO	-2.11058	-1.87544
BRD-K44022883-001-01-7	3-tert-butyl-7-(5-methyl-3-isoxazolyl)-2-[(1-methyl-1H-1,2,4-triazol-5-yl)methoxy]pyrazolo[1,5-d][1,2,4]triazine	-0.756945	-0.266811
BRD-A79052425-003-01-5	4-((2-(1-methylpyrrolidin-2-yl)ethyl)thio)phenol hydrochloride	-1.46579	-1.29297
BRD-K49519092-303-03-0	4-(1H-imidazol-5-ylmethyl)pyridine dihydrobromide	-2.37923	-1.5516
BRD-A60498477-001-01-2	4-(2-{[2-hydroxy-3-(2-methylphenoxy)propyl]amino}ethoxy)benzamide	0.695874	2.1669
BRD-K29570907-001-07-3	4-(3,4,5-trimethoxybenzothioyl)morpholine	0.483338	0.63854
BRD-K82028950-300-03-7	4-(3,4-dichlorophenyl)-5-(4-pyridinyl)-1,3-thiazol-2-amine dihydrochloride	-1.80974	-1.40238
BRD-K14571191-001-01-6	4-(3-chlorophenyl)-1,3-dimethyl-1,6,7,8-tetrahydropyrazolo[3,4-e][1,4]diazepine	-3.19315	-2.75291
BRD-K76139886-003-01-3	4-(3-methoxybenzyl)-2,2,6,6-tetramethyl-1,4,2,6-oxazadisilinane hydrochloride	-1.3388	-1.19708
BRD-K21833260-075-02-9	4-(4-(4-(4-fluoro-3-(trifluoromethyl)phenyl)-1-methyl-1H-imidazol-2-yl)piperidin-1-yl)-1H-pyrazolo[3,4-d]pyrimidine 4-methylbenzenesulfonate	0.41758	1.64537
BRD-K10115470-001-01-8	4-(4-{[(1R)-1-phenylethyl]amino}-7H-pyrrolo[2,3-d]pyrimidin-6-yl)phenol	-1.03406	-1.02336
BRD-K80859331-001-01-5	4-(4-chlorophenyl)-1-[4-(4-fluorophenyl)-4-oxobutyl]-4-piperidinyl decanoate	-4.77944	-3.47915
BRD-K96669468-300-01-1	4-(aminomethyl)-5-(hydroxymethyl)-2-methyl-3-pyridinol dihydrochloride	1.02939	1.17164
BRD-K20431737-001-09-9	4-(benzoylamino)-2-hydroxybenzoic acid	-2.83157	-2.08711
BRD-K99506538-001-03-8	4'-(trifluoromethyl)[1,1'-biphenyl]-2-carboxylic acid	-0.803413	-0.695642
BRD-A21544762-303-01-5	4,4'-((2S,3S,5S,8R,9S,10S,13S,14S,16S)-3,17-diacetoxy-10,13-dimethylhexadecahydro-1H-cyclopenta[a]phenanthrene-2,16-diyl)bis(1,1-dimethylpiperazin-1-ium) bromide	-2.36643	-1.89097
BRD-K41494493-001-13-8	4,4'-(propane-2,2-diyl)diphenol	-2.4254	-0.879547
BRD-K82118441-001-03-7	4,4'-methylenebis(3-hydroxy-2-naphthoic acid)	-0.470543	0.797948
BRD-K49545903-003-01-4	4,4-Pentamethylenepiperidine hydrochloride	-1.81648	-0.814467
BRD-K97417064-001-03-2	4,4'-Sulfonylbisacetanilide	-2.96821	-2.90676
BRD-K80353807-001-25-3	4,9-dimethoxy-7-methyl-5H-furo[3,2-g]chromen-5-one	-0.161668	0.145733
BRD-K81316007-001-01-8	4?8C	-0.864482	-0.745122
BRD-K34445261-001-02-2	4-[(2-phenyl-7H-pyrrolo[2,3-d]pyrimidin-4-yl)amino]cyclohexanol	0.631515	1.59343
BRD-K76788410-001-01-6	4-[(2S,3R)-4-(3,4-dimethoxyphenyl)-2,3-dimethylbutyl]-1,2-dimethoxybenzene	0.347718	0.348036
BRD-K38398115-001-01-9	4-[(4-bromobenzyl)(4H-1,2,4-triazol-4-yl)amino]benzonitrile	-2.52836	-1.36055
BRD-K72533376-001-01-2	4-[(5R,5aR,8aR,9S)-9-({4,6-O-[(1R)-ethylidene]-beta-D-glucopyranosyl}oxy)-6-oxo-5,5a,6,8,8a,9-hexahydrofuro[3',4':6,7]naphtho[2,3-d][1,3]dioxol-5-yl]-2,6-dimethoxyphenyl dihydrogen phosphate	-7.57891	-6.65127
BRD-K73132780-001-01-2	4-[(7-chloro-2-methoxybenzo[b][1,5]naphthyridin-10-yl)amino]-2,6-bis(1-pyrrolidinylmethyl)phenol	-4.82584	-4.76759
BRD-K77432251-001-01-2	4-[2-(2,4-dimethylphenoxy)phenyl]-N-tetrahydro-2(1H)-pyrimidinylidene-1,3-thiazol-2-amine	-2.01482	-0.957292
BRD-A99388803-001-01-5	4-[2-hydroxy-3-(isopropylamino)propoxy]-2,3,6-trimethylphenyl acetate	-4.76257	-3.74634
BRD-K36055864-001-20-0	4-{(2R)-2-[(1S,3S,5S)-3,5-dimethyl-2-oxocyclohexyl]-2-hydroxyethyl}-2,6-piperidinedione	9.39707	15.9222
BRD-K21612934-001-01-1	4-{[3-(6-oxo-1,6-dihydro-9H-purin-9-yl)propanoyl]amino}benzoic acid	-0.621552	-0.528622
BRD-K03503561-001-01-4	4-{2-[(1R,2R)-2-(2,4-difluorophenyl)-2-hydroxy-1-methyl-3-(1H-1,2,4-triazol-1-yl)propyl]-1,3-thiazol-4-yl}benzonitrile	-2.65327	-2.55217
BRD-K97019106-005-02-9	4-Acetyl-1,1-dimethylpiperazinium iodide	-0.784254	-0.299019
BRD-K55172746-001-01-3	4-amino-1-[(2R,4R)-2-(hydroxymethyl)-1,3-oxathiolan-4-yl]-2(1H)-pyrimidinone	-0.986067	-0.918339
BRD-K50813454-001-01-9	4-amino-3-[3-(trifluoromethyl)phenyl]-5-isothiazolecarboxylic acid	-0.39161	0.401611
BRD-K26420709-001-01-7	4-amino-7-((2R,3R,4S,5R)-3,4-dihydroxy-5-(hydroxymethyl)tetrahydrofuran-2-yl)-7H-pyrrolo[2,3-d]pyrimidine-5-carbonitrile	-7.74277	-6.09201
BRD-K39160765-003-02-9	4-Chlorophenylguanidine hydrochloride	-1.081	-1.02336
BRD-A54139254-001-09-2	4-CMTB	-1.76111	-1.67146
BRD-K67173685-001-06-9	4E1RCat	-1.68676	-1.19648
BRD-K90629600-001-01-4	4-ethoxy-2-methyl-5-(4-morpholinyl)-3(2H)-pyridazinone	-1.09098	-0.993902
BRD-A99633051-001-08-8	4-ethyl-5-hydroxy-4-methyl-3,4-dihydro-2H-pyrrol-2-one	-0.918543	-0.750434
BRD-K71977764-001-01-2	4-ethyl-5-isonicotinoyl-1,3-dihydro-2H-imidazol-2-one	1.06214	1.46413
BRD-K47337578-034-03-3	4F 4PP oxalate	-3.51536	-3.20827
BRD-K91758890-001-10-0	4-HQN	0.531841	0.886513
BRD-K70053378-001-02-9	4-hydroxy-1H-imidazole-5-carboxamide	-2.90809	-2.60446
BRD-K92968657-001-02-4	4-hydroxy-3-imino-3,4-dihydrobenzo[e][1,2,4]triazine 1-oxide	-2.22774	-2.10501
BRD-K62537556-001-02-5	4-IBP	-1.59149	-0.800222
BRD-K25690923-001-02-4	4-IPP	-3.10561	-1.92123
BRD-A02933148-001-01-8	4-methyl-5,6,7,8-tetrahydro-8-quinolinecarbothioamide	-1.78461	-1.23553
BRD-K21152241-001-07-3	4-methyl-5-[4-(methylsulfanyl)benzoyl]-1,3-dihydro-2H-imidazol-2-one	-3.40775	-2.69869
BRD-K70821460-300-02-4	4-Methylhistamine dihydrochloride	-0.197874	0.17658
BRD-K46424862-001-14-1	4-Methylumbelliferone (4-MU)	0.687436	1.11179
BRD-A32796301-001-01-6	4-O-(4-O-beta-D-galactopyranosyl-beta-D-galactopyranosyl)-D-glucopyranose	-2.86621	-2.26761
BRD-K37543758-001-01-3	4-oxo-4-(2,4,5-triethoxyphenyl)butanoic acid	2.33962	2.87856
BRD-M17926088-001-02-1	4-oxo-4H-chromene-3-carbaldehyde thiosemicarbazone compound with dichlorocopper (1:1)	-1.72247	-1.66198
BRD-K41024817-325-01-0	4-Phenolsulfonic acid, sodium salt dihydrate, 99%	-0.603613	0.118026
BRD-K78061844-050-02-7	4-PPBP maleate	-3.90159	-2.88683
BRD-A67482312-001-03-4	4-P-PDOT	-3.08512	-2.32654
BRD-K11773281-001-01-2	4SC-202 (free base)	-2.4439	-1.41856
BRD-A64011898-001-01-0	5 -Androst-16-en-3-one	6.97796	8.09157
BRD-K36021395-300-03-2	5-(3-bromophenyl)-7-[6-(4-morpholinyl)-3-pyridinyl]pyrido[2,3-d]pyrimidin-4-amine dihydrochloride	-4.7062	-4.4588
BRD-K98557884-001-01-6	5-(3-fluorophenyl)-2,4-dimethyl-2,4-dihydro-3H-1,2,4-triazole-3-thione	-0.451957	0.251765
BRD-K06388517-001-01-2	5-(4-chlorophenyl)-4-methyl-1H-imidazole	-0.531742	0.751467
BRD-K01773083-001-01-4	5-(benzoylamino)-N-(4-chlorophenyl)-3-methyl-4-isothiazolecarboxamide	-1.82194	-1.65858
BRD-K86799112-001-03-8	5-(hydroxymethyl)-2-furaldehyde	-1.7722	-1.63792
BRD-A67182178-001-01-7	5-(hydroxymethyl)-3-(3-methylphenyl)-1,3-oxazolidin-2-one	0.782132	1.40768
BRD-K53605365-001-01-4	5-(methoxymethyl)-2-methylpyrazine 1-oxide	-0.64339	-0.517713
BRD-K88143662-001-01-5	5,5-diethyl-1-methyl-2,4,6(1H,3H,5H)-pyrimidinetrione	2.46979	6.62568
BRD-K65498798-001-01-7	5,5'-dimethyl-2,2'-bipyridine	1.20951	2.68903
BRD-K60287130-001-06-5	5,7-Dichlorokynurenic acid	-2.70725	-2.54886
BRD-K20093108-001-02-3	5-{[(5S,9R)-9-(4-cyanophenyl)-3-(3,5-dichlorophenyl)-1-methyl-2,4-dioxo-1,3,7-triazaspiro[4.4]non-7-yl]methyl}-3-thiophenecarboxylic acid	-1.79738	-1.76382
BRD-K76614248-001-01-2	5-{3-[(1S,2S,4R)-bicyclo[2.2.1]hept-2-yloxy]-4-methoxyphenyl}tetrahydro-2(1H)-pyrimidinone	4.08191	4.40785
BRD-K82908348-001-01-9	5-{4-[3-(5-methyl-2-phenyl-1,3-oxazol-4-yl)propanoyl]benzyl}-1,3-thiazolidine-2,4-dione	-2.19916	-1.66767
BRD-K94934625-001-01-5	5-acetyl-3H-spiro[benzofuran-2,1'-cyclopropan]-3-one	1.37877	1.45678
BRD-K68408772-001-05-4	5-amino-1-[3,5-dichloro-4-(4-chlorobenzoyl)benzyl]-1H-1,2,3-triazole-4-carboxamide	-4.43218	-4.4071
BRD-K57631554-003-06-2	5-Aminolevulinic acid HCl	-1.27467	-0.643385
BRD-K18172896-001-02-5	5-a-Pregnan-3-a-ol-20-one	1.49314	1.70633
BRD-K03406345-001-24-5	5-Azacytidine	-4.6422	-3.90927
BRD-K33690734-001-02-3	5-BDBD	-5.60489	-2.49907
BRD-K79095980-001-09-6	5-BrdU	-3.08869	-2.74513
BRD-K51700582-001-01-2	5-butyl-2-pyridinecarboxamide	-2.16326	-0.841676
BRD-K92382976-050-01-1	5-Carboxamidotryptamine maleate	-1.69624	-0.587138
BRD-K21920947-001-02-1	5-chloro-2,1-benzoxaborol-1(3H)-ol	-1.38587	-0.82316
BRD-K27293958-001-01-5	5-chloro-3-{2-[4-(2-hydroxyethyl)-1-piperazinyl]-2-oxoethyl}-1,3-benzothiazol-2(3H)-one	-0.944748	-0.0304537
BRD-K64834129-001-19-6	5-ethyl-1,3-bis(methoxymethyl)-5-phenyl-2,4,6(1H,3H,5H)-pyrimidinetrione	0.968224	1.34042
BRD-A96977263-001-02-9	5-HYDROXYDECANOATE	-3.08015	-1.9403
BRD-K24603946-001-03-9	5-hydroxymethyl tolterodine (PNU 200577)	-4.17126	-2.54825
BRD-A73930134-001-03-0	5-hydroxytryptophan (5-HTP)	-1.79147	-1.42094
BRD-K90065682-300-01-8	5-Iodo-A-85380 dihydrochloride	-2.64365	-2.14191
BRD-K45437867-005-01-7	5-Methylfurmethiodide	-2.70107	-2.62936
BRD-K89490285-001-08-1	5-phenyl-1,3,6,7,8,9-hexahydro-2H-[1]benzothieno[2,3-e][1,4]diazepin-2-one	-4.75482	-3.91355
BRD-K86687746-001-01-3	5-pyrimidinecarboxamide-n-hydroxy-2-4-2-naphthalenylsulfonyl-1-piperazinyl	-4.52475	-3.0658
BRD-A96466199-001-01-4	6-(4-chlorobenzyl)-2,3-dihydro-5H-[1,3]thiazolo[3,2-a]pyrimidine-5,7(6H)-dione	0.0374019	0.168847
BRD-K65576800-001-01-6	6-(4-chlorophenyl)-3-{3-methoxy-4-[2-(1-pyrrolidinyl)ethoxy]phenyl}thieno[3,2-d]pyrimidin-4(3H)-one	-3.33378	-2.5722
BRD-K45973863-001-01-4	6,6-dimethyl-1-[3-(2,4,5-trichlorophenoxy)propoxy]-1,6-dihydro-1,3,5-triazine-2,4-diamine	-3.43306	-2.96711
BRD-K26530649-001-01-6	6,6'-disulfanediyldinicotinic acid	-2.48173	-1.34848
BRD-A78277353-001-01-9	6,7-dimethoxy-2-[4-(2-methoxypropanoyl)-1-piperazinyl]-4-quinazolinamine	-1.84707	-1.75908
BRD-K85649978-001-02-1	6-[(5S,9R)-9-(4-cyanophenyl)-3-(3,5-dichlorophenyl)-1-methyl-2,4-dioxo-1,3,7-triazaspiro[4.4]non-7-yl]nicotinic acid	-1.91526	-1.50432
BRD-K75615183-300-04-7	6-allyl-5,6,7,8-tetrahydro-4H-[1,3]thiazolo[4,5-d]azepin-2-ylamine dihydrochloride	-1.9246	-1.80776
BRD-K06902185-001-22-7	6-amino-2-imino-4-(1-piperidinyl)-1(2H)-pyrimidinol	-2.38072	-2.17694
BRD-A15739803-001-01-0	6-chloro-2-methyl-3-{[(2,2,2-trifluoroethyl)sulfanyl]methyl}-3,4-dihydro-2H-1,2,4-benzothiadiazine-7-sulfonamide 1,1-dioxide	-1.68389	-1.63082
BRD-K34663752-001-10-9	6-Chloromelatonin	-2.97662	-2.43205
BRD-K20568871-001-01-1	6-chloro-N-(1-methylcyclopropyl)-4H-thieno[3,2-e][1,2,4]thiadiazin-3-amine 1,1-dioxide	-1.26033	-0.15243
BRD-K04264130-001-01-4	6-fluoro-3-hydroxypyrazine-2-carboxamide	2.04746	4.29018
BRD-K49236613-001-02-3	6-Iodonordihydrocapsaicin	1.76746	2.00277
BRD-K36998189-001-03-5	6-thioxo-1,3-cyclohexadiene-1-carboxylic acid	-0.604984	-0.481792
BRD-K83064458-001-23-0	7-(b-Hydroxyethyl)theophylline	-0.87142	-0.459946
BRD-A18795974-004-09-9	7-(dipropylamino)-5,6,7,8-tetrahydro-2-naphthalenol hydrobromide	-0.846726	-0.566178
BRD-K77756533-001-01-4	7,8,9,10-tetrahydroazepino[2,1-b]quinazolin-12(6H)-one	-1.71665	-1.42488
BRD-A65793993-001-01-6	7-[1-(4-chlorophenoxy)ethyl][1,2,4]triazolo[1,5-a]pyrimidine	-1.18266	-1.0386
BRD-K65377893-001-07-4	7-Aminocephalosporanic acid	-2.15355	0.574688
BRD-K58529924-001-01-5	7-benzyl-4-(2-methylbenzyl)-2,4,6,7,8,9-hexahydroimidazo[1,2-a]pyrido[3,4-e]pyrimidin-5(1H)-one	-7.96874	-6.98493
BRD-A53472930-001-01-7	7-chloro-3,3a-dihydro-2H,9H-isoxazolo[3,2-b][1,3]benzoxazin-9-one	-2.36715	-1.19766
BRD-K84214706-001-06-5	7-Chlorokynurenic acid	-2.86813	-2.82769
BRD-K83335125-001-07-0	7-chloroquinolin-4(1H)-one	-1.75338	-1.18007
BRD-A79643124-001-01-9	7-fluoro-1-methyl-3-(methylsulfinyl)-4(1H)-quinolinone	0.422739	2.726
BRD-A18795974-004-08-1	7-Hydroxy-DPAT hydrobromide	-4.23368	-4.18043
BRD-K53156626-001-01-3	7-methoxy-1,2,3,4-tetrahydro-9-acridinylamine	-0.412778	0.545204
BRD-K41592905-001-01-6	7-methyl-3,7-dihydro-1H-purine-2,6-dione	0.868288	1.0196
BRD-K04430056-001-18-5	7-Nitroindazole	-1.92908	-1.34308
BRD-K97365803-001-04-7	8-(4-aminophenyl)-2-(4-morpholinyl)-4H-chromen-4-one	4.2816	4.94693
BRD-A77218119-001-04-3	8-(4-aminophenyl)-5-methyl-N-propyl[1,3]dioxolo[4,5-g]phthalazine-6(5H)-carboxamide	-2.28969	-2.26591
BRD-A62021152-003-04-2	8,9-dichloro-2,3,4,4a-tetrahydro-1H-pyrazino[1,2-a]quinoxalin-5(6H)-one hydrochloride	-3.38982	-3.14037
BRD-A09554849-236-07-6	8-Bromo-cAMP, sodium salt	0.755308	1.03505
BRD-A00077618-236-07-6	8-Bromo-cGMP, sodium salt	-0.654643	-0.593994
BRD-A48015106-004-08-9	8-Hydroxy-DPAT hydrobromide	0.364103	0.750622
BRD-A60594020-034-01-1	8-Hydroxy-PIPAT	-4.03354	-3.82934
BRD-A07232941-001-03-5	8-M-PDOT	-2.71848	-1.98365
BRD-K80025777-001-01-4	9(E),11(Z)-Octadecadienoic acid	1.65253	3.16704
BRD-K00535541-001-06-3	9-Aminoacridine;9-Aminoacridine;Aminoacrid	-6.00981	-5.45078
BRD-A73385064-001-01-5	9-chloro-11,17-dihydroxy-17-(2-hydroxyacetyl)-10,13,16-trimethyl-6,7,8,9,10,11,12,13,14,15,16,17-dodecahydro-3H-cyclopenta[a]phenanthren-3-one	0.10212	0.663744
BRD-K70329400-001-02-5	A 1070722	0.381192	0.660797
BRD-K77627880-001-05-7	A 205804	1.35249	2.62894
BRD-K62066682-300-01-0	A 412997 dihydrochloride	-3.45953	-0.928739
BRD-K13223831-003-01-7	A 438079 hydrochloride	-4.55674	-2.9754
BRD-A83650191-004-01-0	A 61603 hydrobromide	-4.45173	-4.14015
BRD-A78952587-001-02-3	A 740003	-2.76691	-1.47724
BRD-K87665527-001-01-3	A 784168	-4.35307	-3.17197
BRD-K28570407-001-04-6	A 803467	-1.58233	-1.52292
BRD-K76894955-001-02-1	A 804598	-1.10051	-1.05223
BRD-K60427831-001-01-0	A 839977	-3.53221	-2.95946
BRD-K33059059-001-01-0	A 867744	-4.4213	-3.18207
BRD-K20239555-001-01-2	A 887826	-3.72105	-3.56801
BRD-K81614372-001-02-1	A 922500	-3.82702	-1.85184
BRD-K99308908-001-01-5	A 939572	-7.9821	-5.48827
BRD-K68982262-001-01-4	A 987306	-6.51938	-3.95824
BRD-A30000356-001-01-9	A12B4C3	-4.17008	-3.91355
BRD-K38019854-001-01-6	A-317491	-1.86519	-0.893783
BRD-K49055432-001-07-5	A66	-4.10619	-2.40164
BRD-K78177893-001-02-4	A-674563	2.86594	3.98305
BRD-K03301001-003-03-3	A-7 hydrochloride	-3.0103	-2.32277
BRD-K41918892-001-05-9	A-769662	-2.80356	-0.992531
BRD-K28861668-001-01-9	A922500	-2.91323	-1.07688
BRD-K17443395-065-03-0	Abacavir hemisulfate	-4.79045	-2.20198
BRD-K17443395-065-01-4	Abacavir sulfate	1.33214	2.02288
BRD-K17443395-065-02-2	ABACAVIR SULFATE	-1.41886	-0.807998
BRD-K50071428-001-03-3	Abiraterone (CB-7598)	-1.25883	-1.22832
BRD-K24048528-001-02-5	Abiraterone Acetate	1.95039	2.43373
BRD-K24048528-001-01-7	Abiraterone Acetate	-1.48278	-0.245227
BRD-K59456551-001-22-6	Abitrexate (Methotrexate)	-2.28697	-2.05646
BRD-K36021395-300-01-6	ABT 702 dihydrochloride	-4.77178	-4.37465
BRD-K37714784-305-02-1	ABT 724 trihydrochloride	-1.07947	-0.129119
BRD-K91623615-001-06-8	ABT 751	-7.03781	-4.39387
BRD-K82746043-001-19-3	ABT-263 (Navitoclax)	-6.27698	-5.37313
BRD-K02943813-001-01-9	ABT-333	-2.14381	-0.948454
BRD-K11792081-001-01-4	ABT-639	0.179929	0.336995
BRD-K56301217-001-10-8	ABT-737	-6.48271	-6.44849
BRD-K53788420-001-01-1	AC 186	-2.89339	-0.281506
BRD-K31144453-001-02-2	AC 261066	-4.6308	-2.99134
BRD-K81548480-001-01-2	AC 264613	-0.0743035	0.80125
BRD-K45875383-001-02-0	AC 5216	-6.01329	-2.23163
BRD-K93176058-001-04-4	AC 55649	-4.89343	-3.76811
BRD-K15819326-001-01-6	AC 710	-5.63469	-2.9394
BRD-A27911617-001-01-7	AC-55541	-1.36194	-0.724778
BRD-K64034691-001-01-9	Acalabrutinib	-4.85877	-4.31565
BRD-K92517771-001-01-2	Acalisib	0.567872	1.36408
BRD-K44276885-001-08-2	ACARBOSE	-1.39859	0.915437
BRD-K44276885-001-06-6	Acarbose	-2.65488	-2.16075
BRD-K68633617-003-02-9	ACDPP hydrochloride	-1.55891	-1.53989
BRD-K67068943-001-01-0	ACE2 Inhibitor, MLN-4760	-0.134228	0.238196
BRD-A29260609-003-26-0	ACEBUTOLOL HYDROCHLORIDE	-1.55942	-1.27668
BRD-K07753030-003-17-6	ACECAINIDE HYDROCHLORIDE	-0.0668164	0.282524
BRD-A32673558-003-03-9	Aceclidine HCl	0.272378	1.50646
BRD-K68538666-001-12-3	ACECLOFENAC	-0.638571	-0.395329
BRD-K47195926-001-06-6	ACEDOBEN	-3.69868	-3.33638
BRD-K44004064-001-07-3	Acefylline	0.632749	1.25277
BRD-K13619941-213-01-8	ACEGLUTAMIDE	-2.29617	-1.84711
BRD-K67563174-001-17-6	ACEMETACIN	-2.10572	-1.09669
BRD-A65051990-001-12-9	ACENOCOUMAROL	-0.395113	1.03684
BRD-K37814297-050-09-6	ACEPROMAZINE MALEATE	-5.87418	-4.50419
BRD-K50850824-237-04-8	Acesulfame Potassium	-1.43428	-0.937337
BRD-K41524689-001-23-5	ACETAMINOPHEN	-0.640708	-0.14151
BRD-K11094367-001-10-1	ACETANILIDE	3.56216	4.04788
BRD-K99048103-001-18-4	Acetarsone	0.787383	1.28362
BRD-K43457670-001-27-8	ACETAZOLAMIDE	-2.02624	-1.26011
BRD-K52960356-001-15-5	Acetohexamide	-0.878657	-0.77403
BRD-K21615095-001-08-4	ACETOHYDROXAMIC ACID	1.75116	2.01581
BRD-K42938903-332-01-1	ACETOPHENAZINE MALEATE	-1.24061	-0.450125
BRD-K46416130-001-07-7	Acetrizoic acid	-2.20193	-1.48732
BRD-K82381502-003-23-1	Acetylcholine Chloride	-0.200107	-0.0267493
BRD-K59058747-001-18-3	Acetylcysteine	-1.05003	0.197806
BRD-K59058747-001-20-9	ACETYLCYSTEINE	-1.35021	-0.308084
BRD-K27406233-001-07-7	ACETYL-L-LEUCINE	-1.98608	-0.391623
BRD-K46585355-001-14-3	Acetylsalicylsalicylic acid	0.684448	1.14533
BRD-K72215350-001-06-5	ACEXAMIC ACID	-0.722662	-0.331051
BRD-A29520968-001-03-5	Acifran	-4.53205	-2.76821
BRD-K63736853-001-04-8	ACIPIMOX	1.77886	2.64088
BRD-K62012036-001-14-4	Acitretin	-1.21058	-1.15227
BRD-K13050541-001-01-9	Acivicin	-0.431735	0.384005
BRD-K74363950-004-01-0	Aclidinium Bromide	-2.04665	-1.39357
BRD-K50163129-001-01-4	ACRIVASTINE	-1.65846	-1.19131
BRD-K19781342-001-02-2	ACT 462206	-2.70107	-2.32056
BRD-K33483813-001-10-0	ACTARIT	-1.49574	-0.561028
BRD-K35936936-001-01-6	ACTB-1003	-0.235328	-0.225409
BRD-K08837089-236-01-6	ACTINOQUINOL SODIUM	1.02709	1.15118
BRD-K32318651-001-26-0	Acyclovir	-3.27781	-3.22912
BRD-K33127281-001-06-4	Adapalene	-5.25293	-4.57659
BRD-K00152668-001-01-5	Adarotene	-5.55262	-3.91717
BRD-K96159438-001-06-3	Adefovir Dipivoxil	-3.33906	-2.55098
BRD-K26060080-065-05-6	Adenine sulfate	1.0977	2.28303
BRD-K01577834-001-15-1	ADENOSINE	0.215209	0.645719
BRD-K01577834-001-16-9	Adenosine	-0.401353	-0.128023
BRD-A10111329-001-04-6	ADENOSINE 5-MONOPHOSPHATE	-1.61471	-1.2507
BRD-K60907894-003-23-5	ADIPHENINE HYDROCHLORIDE	4.86455	5.30077
BRD-K68810443-003-01-5	AdipoRon hydrochloride	-3.83549	-3.33166
BRD-K39624409-003-03-4	ADL5859 HCl	-3.78617	-3.56321
BRD-K34870043-001-01-8	Adoprazine	-2.54456	-2.38738
BRD-A90926615-001-02-7	Adrafinil	-1.80358	0.642846
BRD-K82343404-003-02-4	Adrenalone HCl	-2.99336	-2.45202
BRD-K17368287-001-18-3	Adrenosterone	-2.50567	-1.69888
BRD-K77911775-003-01-8	ADX 10059 hydrochloride	-7.41429	-4.9517
BRD-K56543881-001-02-7	ADX-47273	-2.9342	-2.62533
BRD-K40718343-001-04-2	AEE 788	-7.62114	-4.0588
BRD-K77634909-001-05-0	AEG 3482	-4.18643	-3.27291
BRD-K47816470-001-01-8	AF38469	-0.66657	-0.132683
BRD-K53205568-001-02-6	AFALANINE	-0.444788	0.241426
BRD-K66175015-332-01-6	Afatinib (dimaleate)	-5.43836	-5.35229
BRD-A00520476-001-08-2	AF-DX 116	-2.82697	-2.82016
BRD-K23791635-001-01-3	AFN-1252	-2.28099	-1.38615
BRD-K37793595-003-01-7	Afobazole (hydrochloride)	-1.82615	-1.49659
BRD-K49657628-001-15-5	AG 18 (Tyrphostin 23)	-6.25782	-5.80429
BRD-K47105409-001-14-5	AG 490	-2.50679	-0.795724
BRD-K34533029-001-08-5	AG 494	-2.64432	-2.28947
BRD-K60184833-001-05-6	AG 99	-4.65147	-2.04675
BRD-K08310154-001-03-8	AG-1024	-1.85289	-1.66936
BRD-K00615600-001-13-7	AG14361	1.80884	3.63406
BRD-K68336408-001-10-9	AG-1478 (Tyrphostin AG-1478)	-1.3283	1.40027
BRD-A56371469-001-03-3	AGI-5198	-2.45715	-2.35283
BRD-K04691817-001-01-8	AGI-6780	0.843196	1.36368
BRD-K49738308-065-03-1	agmatine	-2.63755	-2.17126
BRD-A18074780-003-02-0	AGN 192403 hydrochloride	-2.76237	-1.83032
BRD-K70262971-001-01-9	AGN 194310	-3.20682	-2.58334
BRD-K32533226-001-01-3	AGN 195183	-1.46989	-0.571253
BRD-K84698278-001-03-4	Agomelatine	-3.26749	-2.7643
BRD-A64808605-003-02-7	AH 11110 hydrochloride	-3.74547	-2.42173
BRD-K59339270-001-03-4	AH 6809	-3.05378	-2.91676
BRD-K10852420-001-02-5	AH 7614	-1.15524	-0.53085
BRD-K91456750-001-01-9	AHU-377	2.11037	2.18384
BRD-K89899948-001-01-7	AI-10-49	-4.11501	-3.04535
BRD-K53448858-001-07-0	AICAR (Acadesine)	-4.8277	-4.0853
BRD-K85139301-001-01-3	AIM 100	-3.0821	-1.94733
BRD-A48300215-001-02-2	AJMALINE	-3.65005	-3.18189
BRD-K09143580-001-01-0	AK 7	0.880866	1.06071
BRD-K54907283-001-01-2	AKBA	1.41124	5.31418
BRD-K26807903-001-04-3	AKLOMIDE	-3.57222	-2.71798
BRD-K44731351-001-01-6	AL 8697	-2.77275	-1.98444
BRD-K53731810-001-04-3	Alantolactone	-3.56307	-2.14663
BRD-K42140276-402-01-4	Alarelin (Acetate)	0.115471	0.746004
BRD-K79131256-001-17-9	Albendazole	-6.3672	-5.59824
BRD-A67060370-001-02-9	Albendazole Oxide	-1.53086	-1.41941
BRD-A88254928-001-07-9	ALBUTEROL	3.43771	5.12811
BRD-A17407635-001-04-0	Alclometasone dipropionate	-1.01365	-0.678247
BRD-A84907376-300-03-8	Alcuronium chloride	0.390546	0.677775
BRD-K06890060-001-09-1	Alda 1	-2.41664	-1.56536
BRD-K11267252-001-06-9	alectinib	-1.3167	-0.855341
BRD-K75527158-360-04-9	Alendronate (Fosamax)	-0.620169	0.0521129
BRD-A27883417-300-01-6	Alexidine HCl	-5.88398	-5.78956
BRD-K49522529-001-01-1	Alfacalcidol	-3.20595	-2.82064
BRD-K49522529-001-02-9	Alfacalcidol	-6.22329	-4.98826
BRD-K51751936-001-09-1	Alfadolone acetate	-0.434079	-0.254681
BRD-K41445866-001-18-8	Alfaxalone	0.390935	0.561297
BRD-A09056319-003-07-7	Alfuzosin HCl	-2.9966	-1.87511
BRD-A41774846-001-01-4	Algestone acetophenide	-4.48103	-3.49978
BRD-K60102752-001-02-2	Alibendol	-0.659387	-0.571367
BRD-K75295174-001-05-0	Alisertib (MLN8237)	-1.9287	0.90246
BRD-K30020243-051-02-5	ALISKIREN HEMIFUMARATE	-2.81738	-2.69028
BRD-A03061970-003-07-3	Alizapride HCl	-1.16072	-0.811749
BRD-K73191876-001-12-0	Alizarin	-4.37799	-4.23438
BRD-A96407378-001-15-1	ALLANTOIN	-2.55217	-2.40807
BRD-A03204438-001-02-0	Allopregnanolone	-4.98876	-3.1029
BRD-K86307448-001-19-1	Allopurinol (Zyloprim)	1.98627	2.2037
BRD-K33219225-001-01-9	ALLYLISOTHIOCYANATE	-4.03884	-1.15227
BRD-K89634775-001-09-9	ALLYLTHIOUREA	-1.24492	-0.0964179
BRD-K84810405-003-01-1	Almorexant (hydrochloride)	-0.593229	-0.445079
BRD-K67601717-037-02-4	Almotriptan Malate	-1.69723	-1.62939
BRD-K04851519-001-06-8	Aloe-emodin	-1.80378	-1.66321
BRD-K83003151-057-01-6	Alogliptin	-2.29076	-1.65464
BRD-K96391852-001-02-8	Aloperine	-0.119755	0.82091
BRD-K46742498-003-11-0	ALOSETRON HYDROCHLORIDE	-1.57038	-1.14767
BRD-K91188791-001-17-5	Aloxistatin	-3.00647	-2.78833
BRD-K72536715-001-01-5	alpha-Asarone	-2.26255	-2.12538
BRD-K74724920-001-02-4	alpha-D-lyxo-hex-5-ulofuranosyl alpha-D-glucopyranoside	-1.68658	-1.05761
BRD-K89712525-001-01-3	Alpha-Keto-Glutarate	-2.90988	-2.48999
BRD-A61850409-001-10-7	alpha-TOCHOPHERYL ACETATE [4mM]	-1.39405	-1.19806
BRD-A00993607-003-24-6	ALPRENOLOL	0.99227	1.46004
BRD-K52459643-001-17-7	Alprostadil	-1.10264	-0.77403
BRD-K52459643-001-15-1	Alprostadil	-1.19806	-0.604984
BRD-K35498378-001-06-1	Alrestatin	-1.67455	-1.31117
BRD-K21415491-001-01-4	ALS-8176 (active form)	-0.624837	-0.537748
BRD-K00610438-003-03-3	Altanserin hydrochloride	-2.02928	-1.04545
BRD-A56675431-001-12-3	ALTHIAZIDE	-3.00951	-2.6321
BRD-K78627070-001-01-5	Altiratinib	-1.10624	-0.751798
BRD-K14619660-001-02-3	ALTRENOGEST	0.688985	1.19518
BRD-K14619660-001-01-5	Altrenogest	0.208897	1.33936
BRD-K67043667-001-26-4	ALTRETAMINE	-2.59775	-2.50858
BRD-K31476763-001-01-5	Alvelestat	2.07437	2.89507
BRD-K89055274-048-22-7	Alverine Citrate	-1.1137	-0.384567
BRD-K07857022-002-01-1	Alvimopan (monohydrate)	-3.65721	-2.5885
BRD-K53979406-003-03-6	ALX 5407 hydrochloride	-2.69474	-1.68207
BRD-K92000912-001-12-6	AM 251	-3.32463	-2.92179
BRD-K59419204-001-02-7	AM 281	-1.01651	-0.692634
BRD-K55462201-001-07-3	AM 404	18.4433	22.285
BRD-K06854232-001-22-3	AM 580	-3.6681	-2.30809
BRD-A11813248-003-03-2	AM 92016 hydrochloride	-2.58753	-2.29263
BRD-K23952234-236-02-6	AM095	-2.29903	-2.0227
BRD-A66116161-001-02-3	AM1241	-5.55832	-3.67286
BRD-K88443722-001-01-7	AM679	-2.65752	-1.99286
BRD-K70330367-003-07-9	Amantadine HCl	-1.465	-1.02826
BRD-K11292736-300-02-8	Ambenonium dichloride	-1.90305	-1.65464
BRD-K41185545-001-02-3	Ambrisentan	-0.582245	0.104088
BRD-K56558538-003-11-9	Ambroxol HCl	-1.00626	-0.156499
BRD-K56558538-003-14-3	AMBROXOL HYDROCHLORIDE	-4.11004	-3.44564
BRD-A36010170-001-04-0	AMCINONIDE	5.12949	5.61698
BRD-K42948882-305-01-1	AMD-070 (hydrochloride)	-5.098	-4.85808
BRD-K82122102-323-01-1	Amfenac Sodium Monohydrate	-2.26049	-0.824228
BRD-A37288617-003-02-2	Amfepramone hydrochloride	-2.86819	0.143087
BRD-K64925568-001-01-8	AMG 232	-2.87561	-2.39814
BRD-K90239174-001-01-8	AMG 487	-1.39487	-0.964558
BRD-K86673452-001-02-5	AMG 548	-7.13656	-4.74982
BRD-K43802723-340-01-9	AMG 837 (calcium hydrate)	-2.63582	-1.24557
BRD-K97452254-001-01-3	AMG 925	0.906948	1.88951
BRD-K01995783-001-02-4	AMG 9810	-3.54635	-2.28375
BRD-K04374714-003-01-1	AMG PERK 44	-0.634608	0.303564
BRD-K32285926-001-02-1	AMG-208	-2.02292	-1.26773
BRD-K27061362-001-01-6	AMG-337	-0.179833	0.113348
BRD-K21782625-001-03-2	AMG458	-1.75842	-0.75355
BRD-K34185671-001-02-8	AMG-517	-3.39046	-2.72178
BRD-K21728777-001-02-3	AMG-900	-3.01524	-2.74937
BRD-K12568846-001-16-1	Amidopyrine	-2.41636	-0.964825
BRD-K80262108-001-07-0	Amifampridine	-1.34289	-1.2425
BRD-A30051119-002-01-8	AMIKACIN HYDRATE	-0.686189	0.0497407
BRD-K97181089-003-24-7	AMILORIDE HYDROCHLORIDE	-0.724919	0.357842
BRD-K24219278-001-01-6	Amineptine	-0.76301	1.43252
BRD-K64931368-003-01-4	AMINOCAPROIC ACID HYDROCHLORIDE	-2.6579	-2.48315
BRD-A25234499-001-19-1	Aminoglutethimide (Cytadren)	-3.93618	-2.58747
BRD-A40777960-001-02-6	AMINOHYDROXYBUTYRIC ACID	-2.71848	-2.3077
BRD-A69917777-065-02-2	AMINOPENTAMIDE SULFATE	-0.0902158	0.0744763
BRD-K62929068-001-16-5	Aminopurine, 6-benzyl	-1.23514	-0.256787
BRD-K07762753-001-05-1	Aminopurvalanol A	-6.35891	-4.51075
BRD-K80267133-001-19-3	Aminosalicylate Sodium	-1.70214	-1.23599
BRD-K13421763-001-06-2	AMINOTHIAZOLE	-1.1937	-1.09588
BRD-K17561142-003-35-8	Amiodarone HCl	-8.26327	-7.25015
BRD-K97643133-003-09-3	Amiprilose hydrochloride	-1.96678	0.323522
BRD-A60197193-001-14-6	Amisulpride	-1.02732	-0.508414
BRD-K53737926-003-27-8	AMITRIPTYLINE HYDROCHLORIDE	-7.36112	-6.85418
BRD-K29530284-001-07-0	Amlexanox	-1.79213	-1.35122
BRD-A22032524-074-10-7	Amlodipine besylate	-7.40812	-5.1217
BRD-K15318383-201-01-5	Ammonium Glycyrrhizinate	1.77292	2.35319
BRD-K23335153-300-03-3	AMN 082 dihydrochloride	-7.03781	-4.12293
BRD-K91290917-300-01-8	AMODIAQUINE DIHYDROCHLORIDE	-4.68957	-3.75575
BRD-K56334280-001-05-1	Amonafide	-5.95542	-4.68321
BRD-A37390343-003-03-5	AMOROLFINE HYDROCHLORIDE	0.867769	1.35117
BRD-K02265150-001-26-5	AMOXAPINE	-4.34413	-3.91963
BRD-K55044200-001-14-6	Amoxicillin (Amoxycillin)	2.47431	2.75215
BRD-K24771047-001-01-6	Ampalex	-0.359431	0.349274
BRD-K52397688-003-06-4	Amperozide	-5.43462	-5.1036
BRD-K47827687-001-02-2	Amprenavir	-2.35596	-0.419273
BRD-K90027121-003-01-7	AMPROLIUM	-2.1328	-1.06193
BRD-K45924332-001-07-7	AMRINONE	-3.70771	-3.34532
BRD-K68346641-001-02-2	AMSACRINE	-3.64207	-3.63408
BRD-A28318179-003-08-5	AMT hydrochloride	0.583882	1.21679
BRD-K39670393-303-02-1	Amthamine dihydrobromide	-2.28744	-0.9363
BRD-K66538826-001-07-2	Amuvatinib (MP-470)	-6.25258	-5.39632
BRD-K03504028-001-07-6	Amygdalin	-1.57997	-0.786747
BRD-A09062839-003-10-0	Amyleine hydrochloride	-0.853748	-0.744246
BRD-K93502141-001-01-6	AMYLENE HYDRATE	-3.2229	-1.74696
BRD-K00256256-001-06-1	AMZ30	-1.67335	-1.63011
BRD-K76713213-001-02-1	AN-2690	-0.691545	0.0949459
BRD-K43230258-001-01-4	AN-2728	-0.666795	0.444689
BRD-A19609491-001-01-8	ANA 12	-3.92634	-2.79616
BRD-K44366189-001-01-9	Anacetrapib (MK-0859)	-0.931583	0.0681863
BRD-K62200014-001-02-6	Anagrelide	-1.02013	-0.288823
BRD-K01174345-001-01-9	Anamorelin	-5.43918	-5.25068
BRD-K42352790-001-05-3	Anandamide	41.3112	41.8811
BRD-K52172416-001-11-4	ANASTROZOLE	-2.44045	-2.10895
BRD-K67536197-003-11-4	ANCITABINE HYDROCHLORIDE	-4.2303	-4.10805
BRD-K82164249-001-03-5	Andarine	2.90566	7.70505
BRD-A86619021-001-04-8	Andrographolide	-3.25283	-3.01645
BRD-K12329651-001-18-8	Androsterone	-1.30889	-0.818928
BRD-K92490248-001-06-6	Anethole (trithione)	-2.57614	-1.92006
BRD-K36040345-001-02-9	Angiotensin (1-7)	-0.893783	-0.259571
BRD-K45503887-001-01-1	Angiotensin II human	-0.7476	-0.119403
BRD-A75305484-001-01-3	Anidulafungin	-3.41367	-3.05647
BRD-K88611939-001-25-7	Aniracetam	-2.00626	-1.79065
BRD-K91370081-001-25-1	Anisomycin	2.01763	2.72029
BRD-A06771424-004-01-7	Anisotropine Methylbromide	-0.0222341	1.07379
BRD-K36949735-001-01-1	Anlotinib	-0.480268	0.0127154
BRD-K55424922-003-03-6	Anpirtoline hydrochloride	-2.14981	-2.10423
BRD-K53252847-001-02-1	Ansamitocin P-3	-5.22267	-5.11016
BRD-K00521308-019-02-7	ANT-161 trifluoroactate salt	-1.77943	-1.6596
BRD-K01363385-003-01-5	Antalarmin hydrochloride	-5.91279	-3.12508
BRD-K99300445-003-21-6	Antazoline hydrochloride	-2.63276	-1.75789
BRD-A67709388-001-05-4	Antimycin A	-5.86759	-5.7771
BRD-K46937689-001-15-0	ANTIPYRINE	-1.8183	-1.57225
BRD-K28383148-001-01-4	AP1903	-3.2422	-1.51728
BRD-K25244359-066-03-4	Apatinib (YN968D1)	2.72287	6.84851
BRD-K72748448-001-01-0	APcK 110	-3.13176	-1.56536
BRD-K86226872-001-01-6	APD597	-1.94815	-1.00507
BRD-K10859802-001-01-0	APD668	-5.27981	-2.8564
BRD-K85140930-001-12-7	Aphidicolin	-3.02526	-2.63929
BRD-K97840621-001-01-5	API-1	-6.50703	-4.64357
BRD-K80431395-001-08-1	API-2	-7.64882	-5.39265
BRD-K01493881-001-29-4	Apigenin	-2.3455	-1.40958
BRD-K41783120-001-02-8	Apilimod	-5.4668	-5.07074
BRD-K23228615-001-03-6	Apitolisib (GDC-0980, RG7422)	14.908	20.0304
BRD-K67121414-001-03-3	APIXABAN	-0.628184	-0.557977
BRD-K64990520-001-08-4	Apocynin	-0.944748	-0.332264
BRD-A35931254-003-04-3	APOMORPHINE HYDROCHLORIDE	-0.8636	0.00914761
BRD-K15164005-001-06-4	Apoptosis Activator 2	-4.46299	-4.12845
BRD-K93208532-001-02-5	Apremilast (CC-10004)	0.721757	0.826755
BRD-K65170927-001-01-6	Aprepitant	-0.396219	0.780176
BRD-K68003372-001-01-6	APTO-253	-5.13957	-3.94628
BRD-K17511755-001-01-7	APY 29	-1.19567	-0.64997
BRD-K38627885-001-01-9	APY0201	-5.63335	-5.1158
BRD-K81729199-001-03-6	AQ-RA 741	-2.11867	-0.774888
BRD-K13167095-001-02-9	AR-42	-5.08871	-3.84931
BRD-K67860401-001-07-2	AR-A 014418	-1.87037	-0.377
BRD-K08037784-001-12-6	Arbutin	-0.762241	-0.420808
BRD-K93188295-300-02-2	ARC 239 dihydrochloride	-1.04876	-0.22873
BRD-K42325600-001-01-8	AR-C155858	-1.65555	-1.26892
BRD-K53523901-001-05-1	Arctigenin	-11.0974	-6.37186
BRD-K72726508-001-02-1	Arcyriaflavin A	0.778531	2.01377
BRD-K63792901-075-02-1	Arecaidine but-2-ynyl ester tosylate	-0.0810463	0.577244
BRD-K88646909-004-16-2	ARECOLINE HYDROBROMIDE	-0.674728	3.12061
BRD-A48261811-001-08-1	Argatroban	-0.273275	-0.0388082
BRD-A48261811-001-07-3	Argatroban	-3.64479	-3.54456
BRD-K08859203-001-01-9	Arg-Gly-Asp-Ser	-2.51451	-1.41857
BRD-K62734952-001-01-0	Arglabin	-1.50817	-1.18189
BRD-K70358946-001-17-3	Aripiprazole	-5.52543	-3.42748
BRD-K87278688-001-01-0	ARMODAFINIL	-1.73224	-0.752279
BRD-K91308639-001-02-7	ARN-509	-1.18065	0.277098
BRD-K60171656-001-01-6	ARQ-092	-5.75478	-4.84451
BRD-K37379014-001-02-0	ARRY-520	-7.72414	-6.86848
BRD-K24179883-001-16-7	ARSANILIC ACID	-0.64339	-0.328628
BRD-K13112821-001-18-2	ARTEMISININ	-2.12245	-1.10404
BRD-K13112821-001-16-6	Artemisinin	-3.28715	-2.63552
BRD-K62213621-001-02-4	ARTENIMOL	-4.16329	-4.04554
BRD-K54634444-001-05-9	ARTESUNATE	-2.4033	-2.35474
BRD-K54634444-001-04-2	Artesunate	-2.45433	-2.41412
BRD-A70514680-003-11-2	Articaine HCl	0.978683	1.94095
BRD-A00047421-001-01-7	ARV-825	-0.412981	0.236261
BRD-K07656463-001-01-5	AS 1269574	-1.77104	-1.06137
BRD-K27051047-001-01-0	AS 1892802	-3.91641	-1.94203
BRD-K61936403-001-02-5	AS 1949490	-1.95264	-1.62206
BRD-K75254015-001-01-9	AS 2034178	-2.46539	-2.4611
BRD-K73565918-003-01-4	AS 2444697	-3.7112	-3.34729
BRD-A53813595-001-02-6	AS 602801	-1.28914	-1.03503
BRD-K63915849-001-03-7	AS-604850	-1.45864	-1.07565
BRD-K88219015-001-10-8	Asaraldehyde	1.33315	2.60387
BRD-K30331124-001-01-7	ASC-J9	-2.96814	-2.60948
BRD-A85242401-001-12-3	ASCORBIC ACID	-2.90564	-1.93063
BRD-K95260951-050-03-1	Asenapine maleate	-5.253	-4.59875
BRD-M82363962-001-02-8	Asenapine maleate	-6.34981	-3.56541
BRD-K35079116-001-02-5	Asiatic acid	0.0275984	0.280808
BRD-K07150325-001-02-5	ASP 2535	-4.82412	-4.10605
BRD-K06542892-001-02-7	ASP 3026	-7.72046	-3.3479
BRD-K11433652-001-17-0	ASPIRIN	-1.93154	-1.88734
BRD-K26838195-075-04-9	AST-1306	-4.38559	-3.896
BRD-K37249724-001-28-1	Astemizole	-8.2568	-4.58932
BRD-K08188887-001-02-4	Astragaloside A	-1.18648	-1.17797
BRD-K87028197-001-01-3	Asunaprevir	-0.567029	0.455586
BRD-K58435339-001-03-0	AT13387	1.07951	1.41542
BRD-K13390322-001-06-3	AT7519	-1.53348	-1.20421
BRD-K12040459-001-07-8	AT7867	-7.13893	-4.7553
BRD-K24576554-001-04-8	AT9283	13.7195	16.8174
BRD-K94830329-001-03-0	Ataluren (PTC124)	0.351354	0.610087
BRD-K09757388-065-04-0	Atazanavir Sulfate	-3.14673	-2.97863
BRD-K43363084-001-02-1	Atglistatin	-5.08401	-4.26432
BRD-K39252998-003-02-3	Atipamezole hydrochloride	-3.70502	-2.29539
BRD-K69726342-238-02-4	Atorvastatin Calcium	-3.1483	-3.08259
BRD-K69726342-238-03-2	Atorvastatin hemicalcium salt	-5.95774	-2.85321
BRD-A19795905-001-08-0	ATOVAQUONE	0.20831	0.561661
BRD-A31990649-304-03-1	ATP (Adenosine-Triphosphate)	1.21744	3.17864
BRD-A75935363-344-05-8	Atracurium Besylate	-2.68088	-2.26052
BRD-K16295392-003-01-3	Atrasentan (hydrochloride)	-0.666795	0.652899
BRD-A27290375-330-02-9	Atropine	-2.28076	-1.82345
BRD-A27290375-330-01-1	ATROPINE SULFATE	-1.82127	-1.65425
BRD-A94640958-001-01-7	Autotaxin modulator 1	1.50829	1.56866
BRD-K23190681-001-01-1	AV-412 (free base)	-6.12567	-3.53467
BRD-K83720053-001-03-8	Avagacestat (BMS-708163)	-0.80062	-0.63771
BRD-K65781196-001-03-0	Avanafil	-1.05052	-0.592538
BRD-K67901620-001-02-0	Avasimibe	2.15494	2.41387
BRD-K68544925-001-01-1	Avatrombopag	-0.3121	0.394446
BRD-K36154108-001-01-7	AVE 0991	-1.1429	-0.337342
BRD-K85882401-323-01-5	Avibactam (sodium hydrate)	-3.53221	-3.18966
BRD-K87782578-001-01-4	AVL-292	1.63938	4.05681
BRD-K62196610-001-01-6	AVN-944	-1.29392	-0.884756
BRD-K14401183-001-10-7	Avobenzone	-0.238262	-0.237961
BRD-K19203487-001-01-4	Avosentan	-2.98718	-2.80477
BRD-K43055376-001-01-2	AWD 131-138	-1.83446	-1.26652
BRD-K29905972-001-10-5	axitinib	-0.0799801	0.158632
BRD-K77012840-300-01-6	AY 9944 dihydrochloride	-9.19065	-8.17477
BRD-K36258877-001-04-9	AZ 10417808	-2.31236	-2.09646
BRD-K09907507-300-01-4	AZ 10606120 dihydrochloride	-5.37142	-3.50666
BRD-K05973499-300-01-0	AZ 12080282 dihydrochloride	-4.71584	-4.00338
BRD-K80935598-001-02-9	AZ 191	-7.26617	-4.84545
BRD-K42436189-001-03-8	AZ 20	-3.19037	-3.11577
BRD-K59146805-001-05-2	AZ 3146	-4.64314	-1.55162
BRD-K05804044-001-14-4	AZ 628	-3.49004	-3.31467
BRD-K64888243-001-04-5	AZ 960	2.57462	3.3478
BRD-K76244476-362-01-7	AZ505 (ditrifluoroacetate)	-2.68296	-2.13048
BRD-K03406345-001-27-8	Azacitidine	-2.93727	-2.75043
BRD-K97061094-001-21-4	Azacyclonol	-6.80345	-3.80875
BRD-K45861246-001-13-4	Azaperone	-1.27393	-1.23599
BRD-A44133049-003-07-8	Azasetron HCl (Y-25130)	-0.692254	-0.459954
BRD-K77821588-364-01-2	Azatadine dimaleate	-1.80096	-1.68435
BRD-K32821942-001-22-1	Azathioprine	-2.4398	-1.38693
BRD-K65928735-001-06-8	AZD 1480	-1.25711	-1.12076
BRD-K73984371-001-01-1	AZD 3988	-3.74429	-3.65785
BRD-K58772419-001-08-8	AZD 6482	-0.43019	0.47183
BRD-K86525559-003-01-7	AZD 7762 hydrochloride	-5.3529	-3.38447
BRD-K61043483-001-01-5	AZD 9272	-4.07533	-1.9155
BRD-K31928526-001-02-1	AZD1152	-4.34767	-3.19918
BRD-K21908111-001-01-8	AZD1208	-1.30184	-0.646617
BRD-K77060810-001-01-5	AZD1283	-0.516732	-0.27772
BRD-K83186168-001-01-8	AZD1981	2.08952	2.98245
BRD-K99113996-001-02-0	AZD2014	-2.53036	-2.24361
BRD-K85014146-001-02-5	AZD2461	-3.52039	-2.23463
BRD-K85849709-001-01-5	AZD2858	6.53376	11.9483
BRD-K14287049-001-01-3	AZD3264	2.34398	3.00199
BRD-K24593301-001-02-3	AZD3463	-6.74931	-6.24106
BRD-K84996356-001-01-1	AZD3514	-3.57667	-3.37028
BRD-K41626799-001-01-1	AZD3759	-2.42919	0.0573914
BRD-K25210703-001-01-9	AZD3965	-2.11896	-1.39922
BRD-K28392481-001-05-1	AZD4547	0.17658	1.83957
BRD-K99023089-001-03-7	AZD5363	-2.3186	-1.69755
BRD-K72414522-001-06-7	AZD5438	10.7413	18.5066
BRD-K88767641-001-01-7	AZD5582	-5.66868	-5.43942
BRD-A87435144-001-01-6	AZD7545	-0.708558	-0.239965
BRD-K31495718-001-01-1	AZD7687	-2.93397	-2.45182
BRD-K69932463-001-10-6	AZD8055	-3.1243	-2.1365
BRD-K37687095-001-06-9	AZD8330	-0.834924	-0.75799
BRD-K82894950-001-01-0	AZD-8835	2.97075	3.6581
BRD-K98572433-001-02-9	AZD8931 (Sapitinib)	3.98669	5.08134
BRD-K42805893-001-04-9	AZD-9291	-5.53555	-5.0335
BRD-K73235735-001-02-7	AZD9496	-5.07682	-4.2003
BRD-K08976401-001-18-5	AZELAIC ACID	-1.32868	-0.257545
BRD-A68888262-003-15-1	Azelastine HCl	-4.2907	-3.63889
BRD-K51899933-001-02-6	Azeliragon	-5.84591	-4.6531
BRD-A01098288-001-06-0	Azelnidipine	-0.488945	0.270106
BRD-K81074237-001-03-1	Azilsartan	-4.01979	-2.64602
BRD-K25723200-001-03-5	Azilsartan Medoxomil (TAK-491)	2.87141	3.31986
BRD-K38913877-300-01-9	Azimilide (Dihydrochloride)	-2.40963	-2.06819
BRD-K74501079-001-17-3	Azithromycin	-4.34245	-4.21123
BRD-K60663764-236-03-9	Azlocillin sodium salt	-1.62555	-0.707521
BRD-K51329597-001-01-3	AZM 475271	-5.01962	-2.64602
BRD-K26824830-001-02-0	Azomycin	-1.61936	-1.54407
BRD-K62607865-001-09-7	Aztreonam (Azactam, Cayston)	-1.70414	-0.963338
BRD-A16694057-001-06-8	BADGE	-0.874338	-0.610646
BRD-K00652956-001-01-5	BAG 956	-6.48739	-5.67168
BRD-K72327355-001-14-7	Baicalein	-3.7722	-2.59754
BRD-K99455969-001-01-0	Baicalin	-2.09334	-2.01997
BRD-K49962337-001-01-1	Baicalin	-2.81646	-1.03002
BRD-K09785578-001-02-0	Bakuchiol	-1.18762	-0.678441
BRD-A00147595-001-01-5	Balaglitazone	-2.19502	-1.39859
BRD-K47976015-001-01-2	Balapiravir	-1.47808	-1.20717
BRD-K27204852-001-02-7	Balicatib	-1.7495	-1.60307
BRD-A47790386-001-03-6	Balofloxacin	1.16358	1.2708
BRD-K41410256-304-02-2	BALSALAZIDE DISODIUM	0.869988	1.20311
BRD-K07442505-001-03-6	BAM7	-2.55471	-2.32606
BRD-A17462676-003-11-6	BAMBUTEROL HYDROCHLORIDE	-0.44969	0.0929264
BRD-K47049295-300-02-3	BAN ORL 24	-4.11637	-4.02043
BRD-K47049295-300-03-1	BAN ORL 24	-4.29903	-4.24064
BRD-K63923597-001-10-0	Barasertib (AZD1152-HQPA)	2.50784	2.92629
BRD-K83359602-001-02-3	BARBITAL	-1.04094	-0.289576
BRD-K20545304-001-01-6	Bardoxolone	-2.17081	-0.399264
BRD-K69694239-001-02-2	Bardoxolone Methyl	-8.8818	-6.21835
BRD-K53581288-001-02-9	Baricitinib (LY3009104, INCB028050)	-2.59502	-1.88945
BRD-K82818427-001-02-2	Batimastat (BB-94)	-1.57279	-1.5488
BRD-K82818427-001-04-8	Batimastat (BB-94)	-3.33996	-3.10484
BRD-K79595931-312-01-3	Bavisant (dihydrochloride hydrate)	-0.910814	-0.349357
BRD-A18763547-300-06-3	Bax channel blocker	-9.44482	-6.56674
BRD-K15025317-001-17-7	BAY 11-7082 (BAY 11-7821)	-4.92025	-4.46892
BRD-K48684885-001-04-2	Bay 11-7085	-0.734442	-0.374055
BRD-K32033120-001-01-1	BAY 41-2272	-3.88661	-1.57597
BRD-K25204779-001-01-1	BAY 57-1293	-0.210075	0.361693
BRD-K32952627-001-01-0	BAY 60-6583	-2.91503	-1.96069
BRD-K86932920-001-02-9	Bay 60-7550	-1.37581	-1.08692
BRD-K53281329-300-01-5	BAY 61-3606 (dihydrochloride)	2.31085	3.29501
BRD-K24666289-001-04-9	BAY 80-6946	6.32639	7.35713
BRD-K70463136-001-01-5	BAY 87-2243	-2.85416	-2.26922
BRD-K66830666-001-01-9	BAZ2-ICR	-4.16174	-2.05632
BRD-K90195324-003-03-3	Bazedoxifene HCl	-8.27666	-6.41114
BRD-K67548518-001-02-4	BB-6-038	-4.98302	-4.72378
BRD-K66541497-001-01-7	BCTC	-6.47	-2.77883
BRD-K90472149-066-01-0	BCX 1470 (methanesulfonate)	-2.09397	-1.49787
BRD-K17008822-303-02-1	BD 1008 dihydrobromide	-3.68361	-3.63738
BRD-K36864847-303-03-3	BD 1047 dihydrobromide	-4.58361	-4.06532
BRD-K29668683-300-02-2	BD 1063 dihydrochloride	-2.31325	-1.58764
BRD-K44824027-001-02-1	BECLAMIDE	-1.35021	-0.665908
BRD-K97810537-001-13-6	BECLOMETHASONE DIPROPIONATE	-1.98477	-1.64029
BRD-K97810537-001-14-4	Beclomethasone dipropionate	-2.42987	-2.15256
BRD-K97810537-001-12-8	Beclomethasone dipropionate	-6.07671	-5.36763
BRD-K90817094-001-03-4	Bedaquiline	-3.72946	-3.22156
BRD-K73425385-065-04-8	BEKANAMYCIN SULFATE	-1.47964	-0.606289
BRD-K17743125-001-08-4	Belinostat (PXD101)	-3.74974	-3.58758
BRD-K14993104-001-05-9	Bemegride	-0.180433	0.544076
BRD-K49807096-003-17-1	Benazepril hydrochloride	-3.05257	-1.86882
BRD-A64698388-003-01-7	Bencynoate hydrochloride	-2.93106	-2.54376
BRD-K17068645-003-04-2	Bendamustine HCl	-1.13579	-0.652121
BRD-A80017228-001-25-7	BENDROFLUMETHIAZIDE	-1.87199	-0.637174
BRD-A22305049-003-13-6	BENFLUOREX HYDROCHLORIDE	-1.69751	-1.46692
BRD-K07359318-001-03-9	benfotiamine	-2.87155	-2.46423
BRD-K97181463-003-02-9	Benidipine hydrochloride	-1.46169	-0.611628
BRD-K79425933-001-09-3	Benperidol	-2.03242	-0.875667
BRD-A61194565-003-27-0	Benserazide HCl	-2.12928	-1.1147
BRD-K58794715-001-01-8	Bentiromide	-0.881339	-0.572196
BRD-K88553858-001-02-7	BENURESTAT	-0.430381	0.0150703
BRD-K87158025-003-08-7	Benzamil	-6.17375	-3.65011
BRD-K87158025-001-01-6	Benzamil HCl	-2.97263	-2.37931
BRD-K11717138-001-30-3	BENZBROMARONE	-1.78194	-1.47653
BRD-K72723676-003-17-8	BENZETHONIUM CHLORIDE	-6.01788	-5.91111
BRD-K56156805-001-09-6	Benznidazole	1.24733	2.12535
BRD-K55160477-001-04-7	Benzo[d]thiazole-2(3H)-thione	-0.658383	-0.379654
BRD-K75466013-001-14-4	BENZOCAINE	-4.45293	-3.44074
BRD-K53397409-001-12-3	BENZOIC ACID	-0.543053	0.340099
BRD-K91699951-001-10-2	BENZONATATE	-5.64205	-3.39894
BRD-K18772613-303-02-4	Benzoquinonium dibromide	0.906025	1.00835
BRD-K70327191-001-02-2	BENZOXIQUINE	3.59809	5.25053
BRD-K20431737-001-04-0	BENZOYLPAS	-2.62004	-2.49819
BRD-K21450440-001-14-6	BENZTHIAZIDE	-2.38072	-1.9123
BRD-K48061146-066-01-7	Benztropine mesylate	-5.13442	-4.1368
BRD-K28542495-003-13-5	BENZYDAMINE HYDROCHLORIDE	-4.37854	-3.72699
BRD-K23403298-003-01-9	Benzyldimethylhexadecylammonium chloride, hydrate, 97%	-5.90249	-4.51654
BRD-K47878171-086-06-0	BEPHENIUM HYDROXYNAPTHOATE	1.55524	2.07437
BRD-K98624455-074-02-8	Bepotastine Besilate	1.64444	2.68538
BRD-A91008255-003-26-3	Bepridil hydrochloride	-7.42046	-5.35546
BRD-K14796088-003-26-8	BERBERINE CHLORIDE	-1.97089	-1.63695
BRD-K12968785-001-13-3	BERGAPTEN	3.30701	3.60948
BRD-K04176066-001-09-1	BERGENIN	0.0697826	0.930672
BRD-K04176066-001-08-3	Bergenin	-0.238102	-0.132658
BRD-K10196357-003-02-0	Besifloxacin HCl (Besivance)	-1.24758	-0.522672
BRD-K91315211-300-05-7	Betahistine 2HCl	-1.10393	-0.640708
BRD-K12014493-001-01-4	Betaine	-1.8035	-1.39965
BRD-A02180903-001-04-5	BETAMETHASONE	2.87655	4.91577
BRD-K12955147-001-01-8	Betamethasone	0.652315	2.83178
BRD-K58148589-001-03-6	BETAMETHASONE 17,21-DIPROPIONATE	-1.41868	-0.446453
BRD-A92177080-001-02-1	BETAMETHASONE ACETATE	2.06447	2.36585
BRD-K58148589-001-02-8	Betamethasone Dipropionate (Diprolene)	-2.56706	-2.4244
BRD-K34032314-001-04-1	BETAMETHASONE VALERATE	-0.575615	-0.115064
BRD-K82142815-001-19-1	BETAMIPRON	-0.795342	0.105265
BRD-K21164796-001-02-8	beta-NAPHTHOL	1.37863	1.771
BRD-A02759312-003-24-5	Betaxolol hydrochloride	-3.25797	-1.37462
BRD-K20075662-300-04-0	Betazole hydrochloride	-1.42678	-1.34656
BRD-K72735080-001-01-0	BET-BAY 002	-3.31952	-1.76554
BRD-A99833829-003-27-1	Bethanechol chloride	-1.31071	-1.19488
BRD-A60153876-001-01-0	BETP	-1.02613	-0.97118
BRD-K45275534-001-01-3	Betrixaban	-1.74885	-1.4174
BRD-K64874225-001-04-7	Betulin	-3.04677	-2.76551
BRD-K45401373-001-22-5	Betulinic acid	-2.15355	-2.14443
BRD-K45401373-001-21-7	Betulinic acid	-4.78509	-2.34851
BRD-K16898998-001-01-6	Bevirimat	-0.89842	-0.166845
BRD-K92441787-001-04-1	Bexarotene	1.68634	2.85735
BRD-K12184916-001-15-4	BEZ235 (NVP-BEZ235, Dactolisib)	6.45581	10.2918
BRD-K46018455-001-27-6	BEZAFIBRATE	-0.375899	-0.307091
BRD-K21673112-003-02-1	BF 2649	-4.92704	-3.63417
BRD-K53422148-001-01-8	BI 224436	-2.17433	-1.63291
BRD-K64890080-001-13-8	BI 2536	-5.03277	-4.43987
BRD-K73982490-001-03-7	BI 78D3	-6.01946	-3.74573
BRD-K04623885-001-10-9	BIBR 1532	-2.92318	-1.43273
BRD-K49294207-300-04-6	BIBU 1361 dihydrochloride	-6.6243	-4.98357
BRD-K70914287-300-03-6	BIBX 1382 dihydrochloride	-5.85282	-4.42575
BRD-A29485665-001-14-4	Bicalutamide	-3.71776	-2.12771
BRD-A81370665-001-06-9	BI-D1870	-1.9157	-1.83961
BRD-K18779551-003-08-6	Bifemelane hydrochloride	-5.44958	-5.25433
BRD-A94543220-001-24-7	BIFONAZOLE	-4.43501	-3.78811
BRD-K51967704-001-04-4	BIIB 021	-0.90594	-0.779328
BRD-K51937257-001-01-4	Bilastine	-1.70414	-1.46413
BRD-A41714661-001-02-0	Bilobalide	1.87046	3.13222
BRD-A45153512-001-01-0	Bimatoprost	-2.19142	-1.97681
BRD-A62743154-003-01-5	BIMU 8	-2.92425	-2.91059
BRD-A13293292-001-02-6	BINA	-4.71151	-3.95205
BRD-K36467523-001-02-8	Bindarit	-0.185902	0.179298
BRD-K04923131-001-14-7	BIO	4.81669	5.49734
BRD-K21318844-001-01-4	BIO 5192	-3.84955	-3.56706
BRD-K73303757-001-21-6	Biochanin A	-1.86916	-1.57629
BRD-K89210380-001-14-5	BIOTIN	0.574688	2.48729
BRD-K89210380-001-13-7	Biotin (Vitamin B7)	-1.33322	-0.40039
BRD-A00546892-001-02-6	BIPERIDEN	-5.60378	-4.34988
BRD-K74065929-001-07-2	BIRB 796 (Doramapimod)	-4.00558	-3.26662
BRD-K64880136-001-02-6	BIRT 377	-4.49494	-3.50717
BRD-K39987650-001-24-1	BISACODYL	-2.63899	-1.28855
BRD-M02179497-001-01-1	BISMUTH OXALATE	1.08021	1.30824
BRD-A03880619-001-02-8	Bismuth Subcitrate Potassium	-2.44163	-1.78017
BRD-K80528473-001-03-0	BISMUTH SUBSALICYLATE	-2.11304	-0.75799
BRD-M56276249-001-01-1	Bismuth(III) trifluoromethanesulfonate, 99%	1.07863	1.15118
BRD-A89175223-051-14-8	BISOPROLOL FUMARATE	-0.790705	-0.528628
BRD-K39120595-304-04-7	BITHIONATE SODIUM	-0.866773	-0.665966
BRD-K13756951-001-01-4	Bitopertin	-3.06618	-2.25047
BRD-K26818574-305-08-4	BIX 01294	-7.85249	-5.41921
BRD-K20290250-001-01-3	BIX 02188	-1.41004	-0.964416
BRD-K73368362-001-08-3	BIX 02189	-4.3137	-2.03222
BRD-K42191735-001-05-3	BKM120 (NVP-BKM120, Buparlisib)	2.80746	5.61743
BRD-K25943794-001-02-3	Blonanserin (Lonasen)	-2.20485	-1.95241
BRD-K72898849-001-01-8	BLU9931	0.463676	0.756098
BRD-K94379058-001-06-8	BML-190	-2.83841	-2.20095
BRD-K42624714-001-04-1	BML-284	-4.50788	-4.22275
BRD-K95142244-001-01-5	BMN 673	-3.72056	-3.58779
BRD-K95609758-001-04-5	BMS 191011	-5.34056	-4.4895
BRD-K87956243-001-01-9	BMS 309403	-4.35343	-2.79616
BRD-K13566078-003-06-0	BMS 345541	0.752061	0.904006
BRD-K34581968-001-05-3	BMS 536924	3.36256	3.54687
BRD-K56932272-001-01-1	BMS 566419	-7.44515	-4.87201
BRD-K07106112-300-01-2	BMS 599626 dihydrochloride	-5.94259	-2.99245
BRD-K15119094-001-01-1	BMS CCR2 22	-4.32363	-1.76165
BRD-K01231377-001-01-8	BMS-191095	-2.7247	-2.42151
BRD-K62814476-001-04-1	BMS-265246	-0.694468	-0.103386
BRD-K99092662-001-01-1	BMS-564929	-2.12538	-1.959
BRD-K97883416-001-01-4	BMS-626529	0.36366	0.672375
BRD-K76239644-001-02-6	BMS-690514	-6.80043	-5.40468
BRD-K49555808-001-03-9	BMS-707035	0.409491	1.84373
BRD-K13049116-001-05-7	BMS-754807	-5.59175	-5.21288
BRD-K13049116-001-03-2	BMS-754807	-7.32495	-5.79624
BRD-K40738845-001-05-0	BMS-777607	-0.0520519	1.10114
BRD-K27182532-001-02-3	BMS-794833	-0.84467	-0.0439513
BRD-K55773932-001-03-8	BMS-806 (BMS 378806)	-3.33952	-2.42074
BRD-K33245965-001-03-4	BMS-833923	-6.52254	-5.60581
BRD-K55781385-001-01-7	BMS-927711	-2.84359	-1.88749
BRD-K22316123-001-01-9	BMS-983970	-0.798366	-0.408885
BRD-A15435692-003-02-3	BMY 14802 hydrochloride	-2.07095	-2.06819
BRD-K84895041-001-02-4	BMY 45778	-2.76279	-1.65256
BRD-K31054881-300-04-7	BMY 7378 dihydrochloride	-1.61054	-1.14301
BRD-A55484088-050-03-3	BNTX maleate	-4.59115	-4.5891
BRD-A09735281-001-03-3	Boceprevir	-3.65793	-3.34796
BRD-A07563059-035-01-3	Bopindolol malonate	-1.23737	-0.844977
BRD-K88510285-001-11-1	Bortezomib (PS-341)	-6.97764	-4.50695
BRD-K74763371-002-04-0	Bosentan Hydrate	-2.23122	-0.834102
BRD-K99964838-001-11-9	Bosutinib (SKI-606)	0.516486	2.14856
BRD-K45479396-050-02-3	BP 554 maleate	-2.51494	-2.35558
BRD-K89329876-001-07-8	BRD 9876	-4.3901	-2.92228
BRD-K72264770-001-03-2	BRD4770	-6.39646	-4.83888
BRD-K77841042-001-11-7	Brefeldin A	-3.9729	-3.73936
BRD-K77841042-001-15-8	Brefeldin A	-5.32592	-5.16899
BRD-K06328344-015-01-7	Bremelanotide (Acetate)	-2.25077	-1.80015
BRD-K96936751-001-02-2	Bretazenil	-2.53583	-1.49109
BRD-K00911143-001-01-9	Brexpiprazole	0.197402	1.11443
BRD-K05531427-001-01-7	Briciclib	-5.53029	-4.68222
BRD-K56981171-001-02-8	Brigatinib	-1.33602	-1.06079
BRD-K56981171-001-01-0	Brigatinib	-5.92864	-5.44069
BRD-K60348325-065-09-9	Brilliant Green, pure, high purity biological stain	-8.68762	-7.91592
BRD-K74913225-001-12-4	Brinzolamide	2.06612	2.48683
BRD-K28428262-001-04-1	Brivanib (BMS-540215)	-0.713646	-0.48891
BRD-A51829654-003-07-7	BRL 15572 hydrochloride	-2.84755	-2.29324
BRD-K84266862-001-04-0	BRL 50481	-2.0016	-1.26474
BRD-A37347161-003-02-6	BRL 52537 hydrochloride	-4.28094	-2.79191
BRD-K17868609-001-05-0	BRL 54443	-0.597162	-0.256846
BRD-A40940854-001-02-9	Broad000212-010-1	-0.844912	-0.784395
BRD-K47679368-236-01-7	Bromfenac Sodium	-1.47815	-0.767237
BRD-K47631482-003-06-2	Bromhexine HCl	0.251503	0.69492
BRD-K14496212-066-04-8	BROMOCRIPTINE MESYLATE	-3.31617	-3.29441
BRD-K73642618-001-13-3	BROMOPRIDE	-3.52973	-3.32889
BRD-K44665581-001-02-6	Bromosporine	-5.53537	-2.24442
BRD-K78643075-001-11-6	BROMPERIDOL	-6.97161	-4.47859
BRD-A68723818-050-32-5	BROMPHENIRAMINE MALEATE	-4.08094	-2.39361
BRD-K36222532-001-01-8	BROXALDINE	-2.99884	-2.80535
BRD-K23301018-001-11-7	Broxyquinoline	0.793706	1.73692
BRD-A36057565-001-01-0	Bruceantin	1.36782	2.47284
BRD-A41995253-330-02-2	brucine	-0.0606798	0.604689
BRD-K31313613-300-01-8	BS 181 dihydrochloride	-7.15432	-4.13837
BRD-K89000287-001-01-1	BTB1	-1.73131	-0.626343
BRD-K15519488-050-02-1	BTCP maleate	-4.62883	-4.099
BRD-K64178227-001-10-8	BTS	-3.93185	-3.33606
BRD-A68304895-003-03-0	BTS 54-505 hydrochloride	-5.80344	-4.08574
BRD-K01492390-001-01-9	BTT 3033	-1.56247	-0.907518
BRD-A53037217-001-02-0	BTZ043 Racemate	1.11612	1.76407
BRD-K55344148-003-02-6	BU 224 hydrochloride	-0.721429	0.671708
BRD-K56115039-003-02-1	BU 226 hydrochloride	-0.897904	-0.822028
BRD-K11696279-003-02-3	BU 239 hydrochloride	-3.08392	-2.69977
BRD-A88684804-001-04-3	BUCETIN	-0.33144	0.475428
BRD-A15931911-001-03-8	BUCLADESINE	-1.58213	-1.54296
BRD-K18324993-001-01-6	BUDIPINE	-3.51847	-3.01645
BRD-K36660044-001-24-2	BUFEXAMAC	-5.30536	-4.37632
BRD-K19462402-003-24-6	BUFLOMEDIL HYDROCHLORIDE	-2.86621	-0.467805
BRD-K38197229-001-31-5	Bumetanide	-2.40671	-0.711226
BRD-A07947329-001-01-4	Buparvaquone	-0.413305	0.35821
BRD-A01636364-003-15-1	BUPIVACAINE HYDROCHLORIDE	-2.97282	-2.62132
BRD-A05186015-003-21-4	Bupropion hydrochloride	-2.44644	-0.976485
BRD-K93461745-003-25-0	BUSPIRONE HYDROCHLORIDE	-1.90637	-1.7387
BRD-K23204545-001-18-0	Busulfan (Myleran, Busulfex)	-3.19551	-2.53186
BRD-K99622919-001-23-0	BUTACAINE	-4.85779	-4.42265
BRD-K23082237-003-01-5	Butaclamol (+)	-1.16828	-0.412963
BRD-K71350836-001-02-4	Butalbital	-1.25492	-0.962716
BRD-K27217864-001-22-3	BUTAMBEN	-6.09535	-5.62853
BRD-K17497770-001-03-6	Butein	-0.603613	0.492898
BRD-K90630139-003-05-9	Butenafine HCl	-0.429424	0.413237
BRD-A47706533-001-02-6	Buthionine sulfoximine	1.54191	3.66966
BRD-A16665823-001-02-0	BUTOCONAZOLE	-4.43747	-4.41355
BRD-K42417338-045-01-9	BUTORPHANOL-(+)-TARTRATE (DEA license)	-2.7035	-1.1137
BRD-K84173274-001-01-6	butyl 2-[3-(trifluoromethyl)anilino]benzoate	1.34932	1.5488
BRD-K08287586-001-14-3	BUTYL PARABEN	-2.01049	-1.82858
BRD-K93035859-001-07-6	BUTYLATED HYDROXYANISOLE	-1.28653	-0.517843
BRD-K53153417-001-10-4	BUTYLATED HYDROXYTOLUENE	-1.84683	-1.67879
BRD-A59378440-001-01-3	Butylphthalide	-1.4262	-1.32004
BRD-A53951045-004-01-6	Butylscopolamine Bromide	2.91448	3.21806
BRD-K01742705-001-01-7	BVT 2733	-1.9658	-0.472179
BRD-A22713669-001-04-3	BVT 948	-7.66121	-6.05667
BRD-K68567222-001-02-0	BVT-948	-5.87305	-5.75528
BRD-K74990253-001-02-8	BW 373U86	-4.68552	-4.38837
BRD-A17428743-003-10-8	BW 723C86 hydrochloride	-4.06739	-3.7361
BRD-K91825936-001-02-0	BX 471	-10.432	-5.87317
BRD-K49669041-001-08-4	BX-912	1.62293	2.06994
BRD-K61665160-001-02-3	BYK 204165	-6.46383	-4.30887
BRD-K54997624-001-06-0	BYL719	-0.310405	1.41141
BRD-K98179423-300-01-3	C 021 dihydrochloride	-10.6604	-6.16495
BRD-K72462751-001-03-5	C-1	-0.922683	-0.774101
BRD-K43167535-001-01-3	C34	-1.73827	-1.25264
BRD-K73383190-001-03-1	C646	2.58977	3.36033
BRD-K73383190-001-02-3	C646	-3.53413	-2.36592
BRD-K06858286-001-01-3	Cabazitaxel	-3.57856	-3.25334
BRD-K86882815-001-05-7	Cabergoline	-3.31003	-2.2582
BRD-K51544265-001-04-2	Cabozantinib (XL184, BMS-907351)	-2.70948	-2.44718
BRD-A90751343-001-01-0	CaCCinh-A01	-2.62495	-1.02036
BRD-K46741531-001-02-4	Cafestol	-1.17249	0.617248
BRD-K06982184-001-04-8	Caffeic acid	-1.57727	-1.39524
BRD-K09900591-001-26-7	Caffeic acid	-2.5923	-1.30184
BRD-K96188950-001-16-9	Caffeic acid phenethyl ester	-7.39003	-5.08319
BRD-K02404261-001-16-7	CAFFEINE	-0.98406	-0.758523
BRD-K60866521-001-07-1	CAL-101 (Idelalisib, GS-1101)	0.830448	1.12804
BRD-K56429665-001-09-6	Calcipotriol	-0.703678	-0.392986
BRD-K27316855-001-19-0	Calcitriol	-4.05784	-3.17812
BRD-K27316855-001-13-3	Calcitriol (Rocaltrol)	-2.81949	-2.73726
BRD-M02899238-238-01-6	calcium bis(3-hydroxy-3-methylbutanoate)	-2.28787	-1.76441
BRD-K35952844-238-02-0	CALCIUM GLUCEPTATE	0.733745	0.768822
BRD-K97009491-238-03-8	Calcium levofolinate (Calcium Folinate)	-0.821195	-0.183466
BRD-K19811997-003-01-3	Calhex 231 hydrochloride	-5.42186	-4.9787
BRD-K45399554-001-03-2	CAM-9-027-3	-5.213	-5.21174
BRD-K35772771-001-02-1	CaMKII-IN-1	-0.882449	-0.540933
BRD-K43806473-066-03-9	Camostat mesylate	-1.43335	-1.3001
BRD-K37890730-001-15-1	Camptothecin	-5.64345	-5.21821
BRD-A91733352-300-04-5	CAMYLOFINE DIHYDROCHLORIDE	-1.41473	-1.0056
BRD-K90868879-001-03-8	CANAGLIFLOZIN	-0.687609	-0.0743035
BRD-K84091759-001-10-5	Candesartan	-4.04447	-2.15726
BRD-A65671304-001-07-5	Candesartan Cilexetil	-0.706616	0.113348
BRD-K50168500-001-07-9	Canertinib (CI-1033)	-1.64558	-1.26474
BRD-K46556543-001-01-4	CANRENOIC ACID, POTASSIUM SALT	-0.686189	-0.591875
BRD-A20644369-001-04-5	CANRENONE	-3.40229	-3.11851
BRD-K97025174-001-01-4	Capadenoson	-1.28561	-1.24539
BRD-K61192372-001-07-1	Capecitabine	-0.0463916	0.652315
BRD-K61192372-001-08-9	CAPECITABINE	-0.544978	-0.0483185
BRD-K61192372-001-06-3	Capecitabine	-3.16305	-1.68215
BRD-A31362467-065-01-3	Capreomycin (sulfate)	-1.49574	-0.826312
BRD-K24790130-001-07-1	CAPRYILIDENE	0.00927395	0.422609
BRD-K44849676-001-11-3	Capsazepine	-4.21123	-3.4871
BRD-K54529596-001-26-3	Captopril (Capoten)	-0.539786	-0.287634
BRD-K75037734-003-13-9	Carbachol	0.983791	1.61994
BRD-K56735750-001-07-6	carbadox	0.197686	0.564098
BRD-K71799949-001-38-0	Carbamazepine	-2.82386	-1.41151
BRD-A11070335-236-02-1	Carbazochrome sodium sulfonate (AC-17)	-2.55856	-1.40582
BRD-A29700858-304-01-8	Carbenoxolone disodiuM	-1.6692	-0.515879
BRD-A29700858-304-02-6	CARBENOXOLONE SODIUM	-1.64875	-0.922243
BRD-K06181161-048-15-1	Carbetapentane citrate	-3.73339	-1.27051
BRD-K56107812-001-01-7	Carbetocin	3.58058	5.52475
BRD-K87156652-001-12-7	CARBIMAZOLE	-0.555852	0.0140115
BRD-A29426959-050-13-2	CARBINOXAMINE MALEATE	-1.36712	-1.24067
BRD-K90947825-001-02-7	Carboplatin	-1.37749	0.679018
BRD-K99174507-003-03-8	Cardiogenol C hydrochloride	-2.95298	-1.34785
BRD-K50905564-001-07-7	Cardionogen 1	-2.43775	-1.68384
BRD-K15179879-001-03-2	Carfilzomib (PR-171)	-5.45026	-5.28123
BRD-K60240222-001-01-4	CARGLUMIC ACID	0.278	0.839422
BRD-K57764956-001-02-8	Cariprazine	-3.68755	-2.93214
BRD-A99939097-001-24-2	CARISOPRODOL	-1.45026	-0.474657
BRD-K11630072-001-13-2	Carmofur	-1.67246	-1.16437
BRD-K36234266-001-08-0	Carmustine	-2.64683	-2.62121
BRD-A17411484-001-11-9	CARPROFEN	-0.074937	0.965097
BRD-K13238618-001-05-9	CARSALAM	-2.12476	-1.46727
BRD-A42167015-003-10-2	Carteolol (hydrochloride)	4.60275	5.97217
BRD-A10977446-001-17-0	Carvedilol	-2.70519	-2.63008
BRD-K09295674-001-09-8	CARZENIDE	-1.09392	-0.823839
BRD-A25043798-001-01-2	CASIN	-8.52522	-6.19485
BRD-K20897876-001-11-8	Castanospermine	-4.59658	-3.72449
BRD-K40269473-001-02-2	Cathepsin Inhibitor 1	-1.12618	-0.388051
BRD-K21070437-001-01-4	Cathepsin S inhibitor	-1.3574	-0.229321
BRD-K40366680-001-04-1	CAY10505	-5.17497	-4.94447
BRD-K49048664-001-01-2	CB-5083	-4.50864	-3.68127
BRD-K58070273-001-03-3	CB-839	0.736745	1.03134
BRD-K34675210-003-01-4	CBiPES hydrochloride	-4.8699	-2.14363
BRD-K64191834-001-03-1	CBS, N-Cyclohexyl-2-benzothiazolesulfenamide	-2.42355	-1.31986
BRD-K45746021-003-01-9	CC-401 (hydrochloride)	1.80679	1.9404
BRD-K48213016-001-01-8	CC-930	-4.06612	-3.62267
BRD-A79726147-001-01-5	CCG 1423	-2.98909	-1.68975
BRD-K08893438-001-04-9	CCG 50014	-1.8986	-1.84677
BRD-K16338837-001-01-8	CCMI	-3.33135	-2.95206
BRD-K16338837-001-02-6	CCMI	-3.87614	-3.72919
BRD-K65503129-001-07-1	CCT 018159	-2.34711	-1.2948
BRD-K90999434-004-01-7	CCT 031374 hydrobromide	-5.76837	-5.16264
BRD-K03289018-001-04-3	CCT 137690	-2.73291	-2.65408
BRD-K76406695-001-02-9	CCT128930	-4.55863	-4.27492
BRD-K57136142-001-01-6	CCT129202	-3.50381	-3.16232
BRD-K09619322-001-03-8	CD 1530	-3.45584	-3.06123
BRD-K28907958-001-05-0	CD 437	-4.89776	-4.4611
BRD-K43914553-001-01-5	CDK9-IN-6	-5.71086	-4.60803
BRD-K02213468-001-02-3	CDPPB	-4.68119	-2.82799
BRD-A47940219-001-01-4	CE3F4	-2.93169	-2.54737
BRD-K48141473-001-01-7	Cebranopadol	-5.57581	-4.51723
BRD-K86930074-001-05-0	Cediranib (AZD2171)	-5.65354	-5.13628
BRD-K20338176-001-17-7	CEFACLOR	-2.71203	-2.33867
BRD-A56858165-001-04-4	CEFADROXIL	-1.9885	-0.644749
BRD-K15766189-001-09-8	CEFDINIR	-1.9872	-1.84901
BRD-K72167406-001-03-9	Cefditoren Pivoxil	0.465268	0.781673
BRD-K72167406-001-02-1	Cefditoren pivoxil	-1.12338	0.534415
BRD-A12077521-003-01-5	CEFEPIME HYDROCHLORIDE	-1.79984	-1.53744
BRD-K21372554-003-02-5	Cefetamet pivoxil (hydrochloride)	-2.90563	-2.15284
BRD-A20839672-003-01-5	CEFMENOXIME HYDROCHLORIDE	1.66612	2.68847
BRD-K02292852-001-02-1	Cefoperazone	-0.795342	0.166959
BRD-K72339976-065-01-3	Cefoselis (sulfate)	-2.0391	-1.74429
BRD-K72339976-065-03-9	Cefoselis sulfate	-2.94066	-2.45202
BRD-A78723049-001-01-2	CEFOTETAN	-1.84437	-1.61141
BRD-K02275692-300-02-6	Cefotiam (hydrochloride)	-2.13413	-0.94014
BRD-K46970505-003-01-9	Cefozopran (hydrochloride)	-3.36272	-1.47653
BRD-K82960980-003-03-5	Ceftiofur HCl	-1.97786	-0.853883
BRD-K82960980-003-01-9	CEFTIOFUR HYDROCHLORIDE	-0.558843	-0.54252
BRD-K82960980-003-02-7	Ceftiofur hydrochloride	-0.991421	-0.12764
BRD-K96734425-304-01-7	Ceftriaxone (sodium salt)	-1.20519	-1.11351
BRD-K02637541-001-22-2	Celecoxib	-1.24134	-1.09104
BRD-A95602221-003-02-1	Celiprolol hydrochloride	-0.517383	-0.476282
BRD-K59325863-001-02-8	CEP-18770 (Delanzomib)	-8.69733	-7.77201
BRD-K20722021-001-02-1	CEP-32496	-3.55502	-3.52428
BRD-K37237504-001-03-5	CEP33779	-1.08808	-0.622258
BRD-K72827473-001-01-0	CEP-37440	-7.63522	-6.48444
BRD-A27376179-001-01-3	CEP-701	-0.537336	-0.44628
BRD-K68904758-001-04-3	Cephalomannine	-3.78801	-3.72641
BRD-K28210218-236-08-1	CEPHALOTHIN SODIUM	-2.35078	-1.70236
BRD-K49880111-236-09-2	CEPHAPIRIN SODIUM	-0.73296	-0.508911
BRD-K96194081-001-11-0	Cepharanthine	-7.79548	-6.86516
BRD-K41707108-001-05-6	Ceramide	0.702944	5.87128
BRD-K25835157-001-02-2	Cerdulatinib	5.8532	7.39782
BRD-K63919159-003-08-8	Cerestat	-5.26032	-2.94353
BRD-K22149900-001-03-9	Ceritinib (LDK378)	-6.31602	-5.41023
BRD-K52075040-001-09-7	Cerulenin	-0.17994	0.730299
BRD-A42571354-300-12-0	Cetirizine dihydrochloride	-2.26891	-0.752279
BRD-K47079459-004-04-6	Cetrimonium Bromide (CTAB)	-6.10617	-5.23402
BRD-K87700323-003-05-1	CETYLPYRIDINIUM CHLORIDE	-8.49976	-5.92839
BRD-M98279124-300-01-1	Cevimeline hydrochloride	-1.21444	-1.00452
BRD-A02473266-001-01-1	Cevipabulin	-7.80847	-6.86943
BRD-K64341947-003-03-2	CFM 1571 hydrochloride	-5.96245	-3.06673
BRD-K42859542-001-03-3	CFM-2	2.85605	4.08204
BRD-K72004355-001-01-9	CFTRinh-172	-1.95331	-1.60525
BRD-A50737080-001-06-3	CGK 733	-5.91131	-5.09847
BRD-A40084411-003-07-7	CGP 12177 hydrochloride	0.943581	1.61234
BRD-K95851186-001-07-8	CGP 13501	-0.199938	2.13409
BRD-A35623999-001-06-5	CGP 37157	-2.25118	-1.93282
BRD-A90272038-001-01-7	CGP 37849	-0.369801	-0.337656
BRD-K13087974-001-03-3	CGP 52411	-2.76073	-1.63131
BRD-K32292990-001-04-4	CGP 53353	-5.51337	-3.34197
BRD-A55369275-001-01-6	CGP 54626	-2.53918	-2.3302
BRD-A74208568-003-02-3	CGP 54626 hydrochloride	-2.92051	-2.5677
BRD-A39277751-001-01-5	CGP 55845	-1.85054	-1.62274
BRD-A89672324-001-04-8	CGP 55845 hydrochloride	-3.11505	-2.2248
BRD-K42500029-001-06-8	CGP 57380	-3.50135	-2.00319
BRD-K79090631-001-22-3	CGP 60474	1.1562	3.16528
BRD-K34321528-003-02-0	CGP 71683 hydrochloride	-5.73372	-4.94447
BRD-K56239177-300-01-3	CGP 74514 dihydrochloride	-8.01843	-4.65828
BRD-K65786282-001-08-3	CGP 7930	-0.230554	0.50704
BRD-K49049886-001-08-7	CGS 15943	1.05387	1.67625
BRD-K68103045-001-03-7	CGS 20625	-4.61845	-2.34851
BRD-K12614344-003-01-8	CGS 21680 HCl	1.51314	1.82372
BRD-A26032986-050-03-9	CGS 9343B	-6.1015	-2.52029
BRD-K22314899-001-02-4	CH 223191	0.0417334	0.498703
BRD-K71487808-001-03-6	Ch 55	-4.92704	-3.96355
BRD-K28352084-001-02-3	CH5132799	3.16528	4.87154
BRD-K18135438-001-16-7	Chenodeoxycholic Acid	-0.983121	-0.321519
BRD-K18135438-001-14-2	CHENODIOL	-1.84287	-1.55365
BRD-K34508702-001-02-4	CHF5074	-0.99015	-0.929144
BRD-K56483981-342-03-1	Chicago sky blue 6B	-2.65862	-2.43205
BRD-K28537285-001-01-8	Chidamide	-0.00757999	0.428304
BRD-K52284881-236-02-4	CHINIOFON	-1.96874	-0.616553
BRD-K16189898-001-21-9	CHIR 99021	-4.0488	-3.22057
BRD-K02241333-001-02-7	CHIR-124	1.84714	3.82712
BRD-K42973005-001-04-0	CHIR-98014	2.20809	3.10014
BRD-A98174560-001-02-1	CHLORALOSE	-2.52472	-2.25475
BRD-K29458283-001-29-9	CHLORAMBUCIL	-2.57397	-1.95005
BRD-K08111712-001-16-7	CHLORAMPHENICOL	0.234328	0.839701
BRD-K08111712-001-14-2	Chloramphenicol	0.177703	0.434988
BRD-K96424892-001-02-9	CHLORAMPHENICOL PALMITATE	0.846282	2.71347
BRD-K21452876-003-01-8	CHLORAZANIL HYDROCHLORIDE	0.340099	1.29798
BRD-A57133233-003-11-0	Chlorcyclizine hydrochloride	-1.433	-0.793015
BRD-K52256627-300-06-6	CHLORHEXIDINE DIHYDROCHLORIDE	-5.94683	-5.83631
BRD-K01653460-001-01-1	CHLORINDANOL	0.0478879	0.344298
BRD-K61802864-001-08-8	CHLORINDIONE	-2.49615	-1.88417
BRD-A01593789-001-03-1	CHLORMADINONE ACETATE	-2.67079	-2.24003
BRD-A20348246-001-15-8	CHLORMEZANONE	-0.433441	2.04124
BRD-K60443845-001-08-6	CHLORMIDAZOLE	-5.85939	-5.71165
BRD-K89056082-001-07-7	CHLOROCRESOL	1.19652	1.38629
BRD-K47114202-001-14-6	Chlorogenic acid	-2.24779	-2.02136
BRD-K28183345-003-11-4	CHLOROGUANIDE HYDROCHLORIDE	-7.20989	-4.73656
BRD-K83257731-003-23-5	CHLOROPYRAMINE HYDROCHLORIDE	-2.17131	-0.327134
BRD-A91699651-316-10-9	CHLOROQUINE DIPHOSPHATE	-3.67881	-2.87455
BRD-K88682005-001-15-8	Chlorothiazide	-0.474304	0.10781
BRD-K27062708-001-23-1	Chlorotrianisene	-0.0381464	0.918351
BRD-K17075857-001-17-6	CHLOROXINE	-0.796403	-0.0776699
BRD-K17223896-001-10-0	CHLOROXYLENOL	-0.187371	0.245227
BRD-A04553218-050-16-2	Chlorpheniramine Maleate	-1.92307	-1.02315
BRD-A39230911-001-10-2	Chlorphensin carbamate	-1.79713	-0.448967
BRD-K89997465-003-43-0	Chlorpromazine HCl	-6.48952	-4.32435
BRD-K97746869-001-27-0	CHLORPROPAMIDE	-3.05332	-1.25062
BRD-K36207157-001-07-0	Chlorprothixene	-5.5424	-5.49349
BRD-K36207157-001-09-6	CHLORPROTHIXENE HYDROCHLORIDE	-5.14963	-4.09795
BRD-K08303368-001-02-7	CHLORPYRIFOS	-2.31817	-2.00249
BRD-K90374350-001-09-2	Chlorquinaldol	-0.294182	-0.00599326
BRD-A26384407-001-25-1	CHLORTHALIDONE	-1.53086	-0.977834
BRD-K98174813-001-18-0	CHLORZOXAZONE	-1.24683	-1.20797
BRD-K43164539-001-11-5	Cholic acid	1.67229	1.87892
BRD-K77300776-001-02-5	Choline Chloride	-2.14384	-1.72028
BRD-K92241597-001-11-0	CHR 2797	-4.14652	-4.09525
BRD-K76259716-019-01-1	CHR 6494 trifluoroacetate	6.80622	10.7535
BRD-M02075109-001-01-1	Chromanol 293B	-0.526196	-0.247474
BRD-K94720315-001-10-4	CHROMOCARB	3.61352	4.30874
BRD-K22861715-001-17-4	Chrysin	-0.978776	-0.553859
BRD-K59284035-001-07-9	Chrysophanic Acid	-1.70414	-1.51978
BRD-K67680372-003-03-4	CI 966 hydrochloride	-1.64848	-1.57293
BRD-K88544581-001-08-7	CI 976	-2.24951	-1.34849
BRD-K52313696-001-14-9	CI 994	0.892986	2.22035
BRD-K58736316-001-09-5	CIANIDANOL	-1.06482	-0.392986
BRD-K35245662-001-01-2	CICLESONIDE	-2.65752	-2.13441
BRD-K13044802-001-03-2	Ciclopirox (Penlac)	-7.72185	-6.55716
BRD-A59391172-001-07-7	CID 16020046	-3.89654	-1.01893
BRD-K92781136-001-08-9	CID 2011756	-2.76427	-1.82001
BRD-K06405316-001-03-3	CID 2745687	-5.71087	-3.2676
BRD-K96153583-001-05-1	Cidofovir (Vistide)	1.17036	2.00435
BRD-A93000692-001-08-1	Ciglitazone	0.67181	2.77243
BRD-K65518078-002-01-1	Cilazapril Monohydrate	-1.45074	-0.927868
BRD-K57252450-001-02-5	Cilengitide	0.273789	0.940429
BRD-A02743701-001-04-4	Cilnidipine	-3.34708	-2.06798
BRD-A02743701-001-06-9	Cilnidipine	-4.51353	-3.07103
BRD-K38473998-001-02-0	Cilomilast	-0.259048	-0.0922703
BRD-K28578425-001-09-6	Cilostamide	-3.19362	-2.84277
BRD-K67017579-001-29-9	Cilostazol	-3.06315	-1.72162
BRD-A75514485-001-01-9	CIM 0216	-2.54472	-1.56756
BRD-A65440446-001-04-1	Cimaterol	-1.75447	-1.64863
BRD-K34157611-001-21-0	Cimetidine	-4.29383	-1.97386
BRD-K73838513-003-05-5	Cinacalcet HCl	-4.82643	-4.56788
BRD-K73440166-001-01-3	Cinaciguat	-1.32909	-0.96861
BRD-K53720352-001-05-7	Cinalukast	-3.92721	-2.87977
BRD-K40901640-003-01-6	Cinanserin hydrochloride	-3.36483	-2.27178
BRD-K39079086-001-07-6	Cinchonidine	0.23252	0.469259
BRD-K39079086-001-06-8	CINCHONIDINE	-1.49305	-0.706928
BRD-K14693417-001-04-0	CINCHONINE	-3.16327	-2.11413
BRD-K72915123-001-18-1	CINCHOPHEN	-2.9691	-2.84125
BRD-K46839850-050-04-2	Cinepazide maleate	-3.07704	-2.3474
BRD-K14704277-001-22-6	Cinoxacin	-0.596403	-0.505896
BRD-K24570280-001-01-8	CINPA 1	-3.53336	-3.0794
BRD-K66241279-001-01-8	CINROMIDE	-1.82847	-1.75424
BRD-K24507548-001-01-8	CINTRIAMIDE	-0.745545	-0.214673
BRD-A49358627-001-14-6	CIPROFIBRATE	0.118298	0.521331
BRD-K04804440-001-09-5	CIPROFLOXACIN	0.32456	0.628141
BRD-K01767299-050-02-1	Ciproxifan	-2.97129	-1.85474
BRD-A35425966-001-02-3	CIQ	-2.97641	-2.75717
BRD-K54142781-003-13-4	Cirazoline hydrochloride	-3.34701	-2.75233
BRD-K70487031-001-02-8	cis-(Z)-Flupenthixol 2HCl	-5.64205	-4.78439
BRD-M29936662-001-02-0	cis-ACPD	-0.526196	-0.116269
BRD-A12896037-001-04-3	CISAPRIDE	-3.42158	-2.81886
BRD-K06895174-001-03-6	Cisapride	-5.45591	-3.43809
BRD-K17498618-344-02-6	Cisatracurium Besylate	-3.46104	-2.47314
BRD-K69172251-001-08-9	Cisplatin	0.000385587	0.0960778
BRD-K53263234-001-06-0	CITCO	-4.69869	-2.40164
BRD-A57957888-001-08-0	CITIOLONE	-0.503492	-0.303211
BRD-K21306330-001-01-0	CJ 033466	-4.13543	-2.91685
BRD-K34303607-300-02-2	CKI 7 dihydrochloride	-4.7172	-2.70977
BRD-K49246350-001-01-1	c-Kit-IN-1	-7.35275	-6.66466
BRD-K00662280-001-10-2	CL 218872	1.00235	1.92375
BRD-K93034159-001-25-8	Cladribine	-5.27184	-4.80463
BRD-K49668410-001-18-8	Clarithromycin	-1.54169	-0.364803
BRD-K17294426-050-12-3	Clebopride maleate	-6.19098	-4.12618
BRD-K30240666-051-16-7	Clemastine fumarate	-4.86221	-4.51202
BRD-K04704168-003-15-0	Clemizole hydrochloride	-2.63991	-2.62422
BRD-A75726477-003-21-3	CLENBUTEROL HYDROCHLORIDE	-2.69725	-1.56122
BRD-A01563671-001-02-7	Clevidipine Butyrate	-2.4312	-2.09805
BRD-K18948558-001-01-9	Clevudine	-0.481911	0.346687
BRD-A46066006-004-22-6	CLIDINIUM BROMIDE	-1.87338	-1.02279
BRD-A61676498-001-06-6	CLIMBAZOLE	-1.70033	-1.53587
BRD-A93964801-003-03-3	CLINAFOXACIN HYDROCHLORIDE	-3.1924	-2.98516
BRD-K23586533-001-03-6	Clindamycin	-2.29597	-1.92505
BRD-K23586533-003-01-6	CLINDAMYCIN HYDROCHLORIDE	1.74999	2.35094
BRD-A76672327-003-02-0	Clindamycin palmitate HCl	-1.01898	-0.957453
BRD-K27771035-001-02-5	Clindamycin phosphate	-2.23359	-1.90519
BRD-A90625545-001-02-0	Clinofibrate	-0.64123	-0.322344
BRD-K09255212-001-16-6	CLIOQUINOL	-0.137593	0.308276
BRD-K52408781-001-02-8	CLOBAZAM (DEA license)	-3.65793	-3.63516
BRD-K71430621-303-02-3	Clobenpropit dihydrobromide	-2.96932	-1.72704
BRD-K10799896-001-26-2	CLOBETASOL PROPIONATE	2.79961	3.61622
BRD-K10799896-001-25-4	Clobetasol propionate	-0.768812	-0.470534
BRD-A43809092-003-02-1	Clobutinol hydrochloride	-0.783595	0.114439
BRD-K38003476-001-09-1	Clocortolone pivalate	7.9181	8.67228
BRD-K72542090-304-02-4	Clodronate Disodium	0.374065	0.629965
BRD-K34022604-001-09-0	Clofarabine	-5.03412	-4.90446
BRD-K56614220-001-19-0	CLOFAZIMINE	-7.12266	-6.62914
BRD-K45252063-001-14-4	Clofibrate	-5.13165	-3.24195
BRD-K19111024-001-20-9	CLOFIBRIC ACID	0.846335	1.51591
BRD-K02900412-001-11-3	Clofoctol	-6.94219	-5.81284
BRD-K29950728-048-18-2	Clomifene citrate (Serophene)	-6.12081	-5.17374
BRD-K52989797-003-26-4	Clomipramine HCl	-3.86506	-3.64556
BRD-K38183498-001-02-0	CLONAZEPAM	-1.86916	-1.71784
BRD-K98530306-003-18-3	CLONIDINE HYDROCHLORIDE	-3.75837	-1.94377
BRD-A85651701-001-19-7	Clopamide	-1.59397	-1.4162
BRD-A80908310-003-13-8	CLOPERASTINE HYDROCHLORIDE	-5.50713	-3.49766
BRD-K27721098-065-10-2	Clopidogrel (Plavix)	-1.79205	-1.71041
BRD-K80036624-001-04-0	CLOPIDOL	-1.52247	-0.841676
BRD-K73251053-003-22-2	CLORGILINE HYDROCHLORIDE	-2.70696	-1.93993
BRD-A29281099-003-03-2	Clorprenaline HCl	-0.848663	-0.39408
BRD-K97521363-001-16-1	CLORSULON	0.72371	2.1535
BRD-A19952358-001-11-3	CLOSANTEL	-2.07464	-1.35592
BRD-K10990317-001-04-5	Clothiapine	-4.05175	-2.21442
BRD-K15916496-001-29-5	Clotrimazole	-6.7769	-3.77762
BRD-K01244426-236-12-1	CLOXACILLIN SODIUM	0.311424	1.0213
BRD-K46982791-001-09-4	CLOXYQUIN	-1.75627	-1.23563
BRD-K37289225-001-36-4	CLOZAPINE	-5.05537	-4.55799
BRD-K81026553-234-01-8	c-Met inhibitor 2	-1.70414	-1.59861
BRD-K54095730-001-03-1	CMPD-1	-2.22951	-1.51359
BRD-K19438463-001-05-5	CNQX	0.836784	1.40027
BRD-K24869513-001-02-1	CNX-2006	-4.02447	-2.63394
BRD-K48443249-001-01-0	CNX-774	3.8597	4.15775
BRD-K55677650-003-03-7	Co 101244 hydrochloride	-4.53205	-3.14541
BRD-K70912147-001-01-8	Co 102862	-1.97985	-1.64859
BRD-K33610132-001-02-9	CO-1686 (AVL-301)	-0.046724	0.620133
BRD-K51040301-001-02-1	Cobicistat (GS-9350)	-3.02182	-2.93407
BRD-K03390685-001-01-7	Cobimetinib	-4.6391	-4.36204
BRD-K00259736-001-18-0	Colchicine	-4.22039	-3.37582
BRD-K00259736-001-16-4	COLCHICINE	-4.81914	-3.98673
BRD-A55416093-001-06-4	COLFORSIN	1.49116	3.49702
BRD-K23672206-001-01-4	Coluracetam	-2.02127	-1.09243
BRD-K19655798-001-01-9	Compound 401	2.29412	2.83659
BRD-K98143539-001-02-2	Compound W	1.52799	3.79377
BRD-K37385792-003-02-1	Conivaptan HCl	-1.11945	-0.332264
BRD-K74965187-001-01-3	COR 170	-3.46462	-3.43276
BRD-K65428967-001-09-2	Cordycepin	-2.40671	-1.72452
BRD-K27885593-001-06-8	Corosolic acid	1.1577	1.54365
BRD-K41779183-001-02-0	Cortexolone 17 alpha-propionate	-0.0272994	1.24865
BRD-K73589401-001-23-6	Corticosterone	0.938058	0.983442
BRD-A62731508-001-05-8	CORTISONE	-0.400624	-0.322344
BRD-K86161929-001-13-3	CORTISONE ACETATE	-0.464575	-0.372849
BRD-K86161929-001-11-7	Cortisone acetate (Cortone)	-1.86025	-1.0186
BRD-K32891457-001-16-3	Cortodoxone	1.00806	2.15399
BRD-K26833429-001-02-8	Costunolide	-3.5386	-2.75743
BRD-K98710228-001-01-6	Cot inhibitor-1	-3.53913	-2.7625
BRD-K49468759-001-05-9	Cot inhibitor-2	-4.07656	-3.43265
BRD-K94144010-001-13-9	COTININE	0.00243233	1.95999
BRD-K23913458-001-20-7	COUMARIN	-1.77242	-1.44874
BRD-K41567533-001-08-3	COUMOPHOS	-0.53273	-0.108143
BRD-K53913008-001-01-5	CP 316819	-2.67488	-1.64494
BRD-K52113681-003-02-1	CP 339818 hydrochloride	-6.97906	-6.50919
BRD-K31394475-003-01-5	CP 376395 hydrochloride	-5.78137	-5.34658
BRD-K43621685-001-03-3	CP 673451	-7.63781	-7.23461
BRD-K31283835-048-03-6	CP 690550 citrate	1.64958	1.97341
BRD-K96843359-001-02-6	CP 775146	-3.83656	-3.16496
BRD-K81876028-300-02-0	CP 93129 dihydrochloride	0.978402	1.35148
BRD-K09946180-300-01-6	CP 99994 dihydrochloride	-3.27451	-3.05839
BRD-K38158531-001-02-1	CP-101,606	-1.8887	-1.16072
BRD-K26921335-003-01-2	CP-640186 (hydrochloride)	8.37688	16.6495
BRD-K76908866-001-07-6	CP-724714	2.3358	3.29438
BRD-K19171642-001-02-3	CP-91149	0.247869	0.360478
BRD-A69126730-001-01-3	CPA inhibitor	-0.561155	0.0991801
BRD-A05729358-001-03-8	CPCCOEt	-3.13291	-2.82323
BRD-K15811707-001-02-0	CPI 203	-3.73264	-3.29886
BRD-K19871656-001-01-3	CPI-0610	-2.3825	0.214462
BRD-K97181972-001-01-9	CPI-169	-0.140542	0.109352
BRD-K18319422-001-01-7	CPI-360	-3.19131	-2.58827
BRD-A06916187-001-02-9	CPI-613	-1.02336	-0.354081
BRD-K08547377-003-06-5	CPT 11	-6.17993	-3.74573
BRD-K13495773-001-11-4	Creatinine	-0.745545	-0.603602
BRD-K22127577-001-03-7	Crenolanib (CP-868596)	-7.8915	-7.36301
BRD-K58648841-001-04-7	CRESOPIRINE	-1.35342	-1.18007
BRD-K78431006-001-11-0	Crizotinib (PF-02341066)	-6.15824	-5.63606
BRD-M89827113-001-01-5	Cromakalim	-0.619424	-0.0578306
BRD-K57179821-001-15-4	CROTAMITON	-2.13694	-1.43979
BRD-K02816415-001-01-9	CRT0044876	-2.65312	-0.982034
BRD-K30572193-001-02-0	CTEP (RO4956371)	-2.57775	-1.32054
BRD-K53508936-001-02-8	CTS-1027	-2.16753	-2.11828
BRD-K58234744-001-01-0	CU CPT 4a	-5.18626	-2.18382
BRD-K41278234-001-03-0	CUDC-101	0.652153	1.6352
BRD-K77638923-001-02-0	CUDC-907	-5.40601	-4.92088
BRD-K07572174-001-39-4	Curcumin	-5.3546	-4.77032
BRD-K89462779-001-01-8	CU-T12-9	-6.35274	-4.22387
BRD-K49197823-001-09-8	CV 1808	-1.03156	-0.041322
BRD-K60659193-001-02-8	CVT 10216	-3.10196	-1.194
BRD-K84068331-001-01-9	CW 008	-1.86143	-1.70626
BRD-K81458380-001-04-9	CX-4945 (Silmitasertib)	-0.0930827	1.17679
BRD-K12787259-001-04-3	CX-5461	-4.11216	-2.53076
BRD-K39371216-001-01-3	CYACETACIDE	0.517971	1.33874
BRD-A47884604-051-01-2	Cyanopindolol hemifumarate	0.807657	1.70323
BRD-K64866502-001-03-9	CYC116	30.6213	37.9927
BRD-K50785021-001-02-1	Cyclamic acid	-5.04825	-1.91196
BRD-A27370296-001-03-0	CYCLANDELATE	-0.243433	-0.0722452
BRD-K31792052-004-02-7	Cyclic Pifithrin-? hydrobromide	-1.81077	-0.859771
BRD-K79501723-001-04-6	CYCLIZINE	-3.34403	-2.92415
BRD-K42348709-003-13-1	CYCLOBENZAPRINE HYDROCHLORIDE	-6.34467	-6.30048
BRD-K67536197-003-10-6	Cyclocytidine HCl	-4.07822	-3.81645
BRD-A08079565-001-01-8	Cyclodextrin	-1.45307	-1.4174
BRD-A41250306-001-11-7	Cyclopenthiazide	-0.830565	0.0197073
BRD-A77291778-003-22-0	CYCLOPENTOLATE HYDROCHLORIDE	-4.08683	-2.93971
BRD-A09722536-002-19-8	Cyclophosphamide monohydrate	-2.44508	-1.87281
BRD-A10420615-001-03-6	Cyclopiazonic Acid	-2.2987	-2.04348
BRD-A69815203-001-07-6	Cyclosporin A	-0.735108	-0.49226
BRD-K13533483-001-16-2	Cyclosporin A	-3.1085	-2.70107
BRD-K13533483-001-17-0	Cyclosporine	-3.91678	-3.88173
BRD-K27799744-001-02-8	Cyclovirobuxin D (Bebuxine)	-3.04622	-2.28489
BRD-K69877120-001-01-7	CYM 50260	-1.56247	-0.721836
BRD-K80666802-003-01-0	CYM 50358 hydrochloride	-6.14521	-5.39363
BRD-K27732927-001-03-6	CYM 50769	-5.18774	-2.20729
BRD-A43005764-003-01-5	CYM 5442 hydrochloride	-6.73861	-5.98395
BRD-K29151923-001-01-5	CYM 5520	-1.27443	-0.690005
BRD-K75940276-001-03-3	CYM 5541	-2.11886	-1.05754
BRD-K28143534-003-25-9	Cyproheptadine hydrochloride	-3.55147	-2.02317
BRD-K41141507-001-17-0	CYPROTERONE ACETATE	1.08635	1.32136
BRD-K41141507-001-16-2	Cyproterone Acetate	-0.876615	-0.760381
BRD-K36711084-001-02-0	CYROMAZINE	-0.328105	0.143144
BRD-M77687198-001-12-2	Cysteamine HCl	-4.26537	-3.86222
BRD-K92611362-001-02-6	CYSTEAMINE HYDROCHLORIDE	-2.80405	-2.10656
BRD-K87737963-001-06-0	CYT387	12.1422	16.1308
BRD-K71847383-001-07-5	Cytarabine	-3.70347	-3.51492
BRD-K71847383-001-12-5	Cytidine	-2.18524	-2.06108
BRD-K74186897-001-13-2	CYTISINE	-0.0692392	1.15114
BRD-K74186897-001-12-4	Cytisine (Baphitoxine, Sophorine)	-1.71153	-1.33322
BRD-K47000838-001-01-6	Cytochalasin B	-1.83299	-1.48627
BRD-K01377300-001-02-9	CZC 24832	-4.51234	-2.58396
BRD-K87021635-003-02-2	CZC 54252 hydrochloride	-4.13976	-3.54139
BRD-K09132007-001-11-7	D 4476	-3.31679	-2.79707
BRD-K74377520-001-01-7	D-(+)-MALTOSE	-0.223429	-0.182745
BRD-A58955223-001-03-8	D,L-Sulforaphane	-0.576843	0.488609
BRD-K64636206-001-02-7	D-??-Tocopheryl Succinate	-1.75447	-1.50579
BRD-K26997899-001-02-2	D-64131	-4.69594	-3.89846
BRD-K01080633-001-01-9	DAA-1106	-2.67278	-2.59142
BRD-K57041787-001-02-6	Dabigatran Etexilate	-0.796403	-0.601652
BRD-K09951645-001-06-8	Dabrafenib (GSK2118436)	-1.79148	-0.776775
BRD-K35520305-001-17-7	DACARBAZINE	-2.61393	-1.97318
BRD-K82861010-001-02-5	Daclatasvir (BMS-790052)	-2.05735	-1.54798
BRD-K57169635-001-04-5	Dacomitinib (PF299804, PF299)	-5.50101	-4.83988
BRD-K42095107-001-22-1	Daidzein	-2.6661	-2.22104
BRD-K18849474-001-04-4	Dalcetrapib??JTT-705??	-1.16376	-1.04521
BRD-A92537424-001-04-7	DANAZOL	-1.40644	-0.935516
BRD-K13769342-001-01-5	Danirixin	-1.76048	-1.27125
BRD-K45916615-066-02-5	Danofloxacin Mesylate	-0.132269	0.221378
BRD-K08111240-001-02-8	Danoprevir (ITMN-191)	1.48129	3.87501
BRD-K10065684-001-07-4	DANTHRON	-0.642322	-0.383365
BRD-K81272440-236-13-5	DANTROLENE SODIUM	-1.78194	-1.50432
BRD-K07881437-001-04-6	Danusertib (PHA-739358)	-0.0534047	0.458024
BRD-K58160573-001-04-7	DAPAGLIFLOZIN	1.2931	2.43035
BRD-K58160573-001-05-4	Dapagliflozin	0.193402	1.05488
BRD-K61269089-001-05-5	Daphnetin	-0.0412944	0.596355
BRD-K12885236-001-02-7	Dapivirine (TMC120)	-3.12351	-1.30519
BRD-K51579475-003-02-4	Dapoxetine HCl	-4.58049	-4.44945
BRD-K06455935-001-01-3	Daprodustat	-0.847647	-0.35633
BRD-K62363391-001-24-9	DAPSONE	-2.76893	-2.41049
BRD-K47177710-001-04-9	DAPT	-4.08526	-2.17546
BRD-K19085898-001-01-8	Darapladib	-7.26625	-6.73498
BRD-K95773607-004-03-8	Darifenacin HBr	-3.91979	-3.45341
BRD-K95773607-004-04-6	DARIFENACIN HYDROBROMIDE	-3.43051	-3.24244
BRD-K84986517-001-01-8	Darunavir Ethanolate	-0.215504	2.36621
BRD-K49328571-001-15-0	Dasatinib	1.00452	1.51054
BRD-K31633810-003-03-6	DAU 5884 hydrochloride	-4.73316	-4.11888
BRD-K14276241-001-01-2	Daucosterol	-3.15653	-1.95865
BRD-K43389675-003-19-1	Daunorubicin HCl	-6.68087	-4.22111
BRD-K43389675-003-16-7	Daunorubicin HCl (Daunomycin HCl)	-5.57719	-5.07347
BRD-K43389675-003-20-9	Daunorubicin hydrochloride	-5.12939	-3.95842
BRD-K59204667-001-05-6	DBeQ	-5.29699	-2.61579
BRD-K83020231-001-01-2	DBPR108	-1.28067	0.336995
BRD-K04622161-001-03-1	DBZ	-3.22153	-2.56377
BRD-K10596918-001-01-9	DC 260126	-4.46416	-3.12416
BRD-K82903013-001-01-4	DCB	-2.12615	-1.05345
BRD-K89299012-001-08-6	DCEBIO	-1.09104	-0.781637
BRD-A39255369-001-03-1	DCPIB	-2.1621	-1.47722
BRD-K04657451-001-01-0	D-delta-Tocopherol, 93%	-1.51531	-1.35609
BRD-K61845293-300-01-9	DDR1-IN-1	-4.22346	-3.37385
BRD-K49783248-303-08-4	DECAMETHONIUM BROMIDE	-0.986361	1.07386
BRD-A95300432-001-01-3	Decernotinib	-0.290972	0.0137258
BRD-K79254416-001-22-6	Decitabine	-1.92692	-1.69116
BRD-K17641316-001-04-8	Decoquinate	-1.73224	-0.585706
BRD-K43578482-001-02-2	Defactinib	4.83691	5.0253
BRD-K97010173-001-04-1	Deferasirox	-1.63741	-1.32301
BRD-K06878038-001-18-6	DEFERIPRONE	-0.698312	0.179742
BRD-K09821361-066-25-8	Deferoxamine (mesylate)	1.63696	5.60433
BRD-K96006502-001-02-6	Deflazacort	0.61348	0.976117
BRD-A88562598-001-01-7	Degarelix	-4.27441	-3.40081
BRD-A17300716-001-01-5	DEHYDROACETIC ACID	2.49377	2.61566
BRD-A64125466-236-04-6	DEHYDROCHOLATE SODIUM	1.52417	2.52983
BRD-A11551002-001-04-6	DEHYDROCHOLIC ACID	-2.40563	-1.63347
BRD-K67186445-001-02-1	Dehydrocorydaline	-0.793803	0.121605
BRD-K41256143-001-12-7	Dehydroepiandrosterone (DHEA)	-1.59674	-1.02539
BRD-K90830492-305-01-4	Deltarasin	-9.11097	-5.15166
BRD-K51471001-303-04-7	Demecarium bromide	0.172873	1.1124
BRD-K34122555-057-06-5	DENATONIUM BENZOATE	-2.8507	-2.66679
BRD-K41170226-001-13-8	Deoxycholic acid	-0.569193	-0.464543
BRD-K98521173-001-19-4	Deoxycorticosterone	0.0388082	1.10522
BRD-K24556098-001-17-5	Deoxycorticosterone acetate	-2.56312	-2.46341
BRD-A65797496-048-09-3	Deptropine citrate	-8.25742	-7.35023
BRD-K77685957-300-09-1	DEQUALINIUM CHLORIDE	-3.56353	-3.11491
BRD-K68558722-001-04-0	DERACOXIB	-0.314253	0.0687894
BRD-K82357231-001-19-1	Desloratadine	-6.93248	-4.66159
BRD-A49399758-015-01-8	Desmopressin (Acetate)	-0.954933	-0.233574
BRD-K46061689-001-01-9	DESOGESTREL	2.28486	4.94112
BRD-K21528677-001-04-4	DESONIDE	-0.66287	-0.394609
BRD-K21528677-001-02-8	Desonide	-1.10245	-0.942812
BRD-K21528677-001-03-6	Desonide	-2.39434	-1.96868
BRD-K24556098-001-19-1	DESOXYCORTICOSTERONE ACETATE	-1.85813	-0.911396
BRD-A49447682-001-02-4	DESOXYMETASONE	0.543689	0.638404
BRD-K13819402-003-10-2	Desoxypeganine HCl	-0.231071	0.230673
BRD-A98845662-001-03-1	Desvenlafaxine	-0.687482	-0.284961
BRD-K77597856-003-02-5	Detomidine HCl	-3.27007	-2.15958
BRD-A10188456-001-04-9	DEXAMETHASONE	1.18042	1.61462
BRD-K38775274-001-22-1	Dexamethasone	0.243216	1.02406
BRD-K38775274-001-23-9	Dexamethasone (DHAP)	0.642606	1.17304
BRD-K47635719-001-20-3	Dexamethasone acetate	3.35583	3.67829
BRD-K47635719-001-21-1	DEXAMETHASONE ACETATE	2.66624	3.99009
BRD-A83802939-304-04-2	DEXAMETHASONE SODIUM PHOSPHATE	-0.555282	-0.357177
BRD-K39462424-050-09-8	DEXCHLORPHENIRAMINE MALEATE	-2.93407	-2.63544
BRD-K58626373-003-07-8	Dexfenfluramine hydrochloride	0.0771697	0.937835
BRD-K05900209-001-03-4	Dexlansoprazole	-3.15147	-1.66397
BRD-K18423410-003-03-3	Dexmedetomidine hydrochloride	-4.99494	-3.50135
BRD-K71210479-001-05-5	DEXPANTHENOL	-1.20212	-0.519491
BRD-K07265709-003-05-6	Dexrazoxane Hydrochloride	-2.64974	-2.30379
BRD-K21160401-065-01-0	DEXTROAMPHETAMINE SULFATE	-0.216966	-0.0419977
BRD-K33211335-004-01-7	DEXTROMETHORPHAN HYDROBROMIDE	-3.15833	-1.92787
BRD-K51431759-001-02-9	Dextrose	-1.37174	-0.910064
BRD-K82002057-001-01-2	DFB	-0.144042	-0.130537
BRD-K36449075-001-01-0	D-Histidine	-1.73964	-1.4886
BRD-K69122748-001-10-1	DIACERIN	1.33315	1.3885
BRD-K93611241-001-02-2	DIACETAMATE	-1.23915	0.0706419
BRD-K48247567-001-01-9	DIATRIZOIC ACID	-3.06965	-1.92367
BRD-K97464279-001-03-5	DIAVERIDINE	-1.5958	-0.764618
BRD-K16508793-001-05-9	DIAZEPAM (DEA license)	-0.236377	-0.0219877
BRD-K73109821-001-22-7	Diazoxide	-3.63096	-2.02975
BRD-K79145749-003-02-2	Dibenzepine HCl	0.286686	0.605359
BRD-K46863940-001-06-2	Dibenzothiophene	-2.61042	-2.3196
BRD-K99121711-003-19-7	Dibucaine HCl	-3.7156	-3.48745
BRD-K73477617-001-08-5	DIBUTYL PHTHALATE	1.76605	2.39854
BRD-A94624445-236-18-8	Dibutyryl-cAMP, sodium salt	-2.75589	-1.84423
BRD-K54187111-001-09-2	DICHLORISONE ACETATE	0.827083	1.11484
BRD-K54187111-001-08-4	dichlorisone acetate	-0.345555	1.17235
BRD-K71499074-001-12-9	Dichlorphenamide	-1.465	-0.708303
BRD-K23779958-001-02-5	DICHLORVOS	-2.92799	-2.56393
BRD-A06426627-001-03-5	Diclazuril	1.01154	1.5366
BRD-K08252256-236-33-8	DICLOFENAC SODIUM	2.48665	2.50655
BRD-A51078674-003-01-0	Diclofensine (hydrochloride)	-5.16651	-4.48368
BRD-K05673000-236-12-1	DICLOXACILLIN SODIUM	-1.75228	-0.857308
BRD-K82236179-213-01-0	DICUMAROL	-1.71741	-1.67719
BRD-K68507560-003-24-6	Dicyclomine HCl	-5.66816	-4.87869
BRD-K99063460-001-13-1	Didanosine (Videx)	-1.83908	-0.911396
BRD-K94146583-001-01-6	Didox	-1.70947	-1.28063
BRD-K95309561-001-24-7	DIENESTROL	-1.42108	-0.351253
BRD-K50853363-001-02-3	Dienogest	-1.74134	-0.838651
BRD-K62490786-001-01-1	diethyl 4-[(4-bromo-2-cyanoanilino)carbonyl]benzylphosphonate	-1.11632	-0.875889
BRD-K45542189-048-22-1	DIETHYLCARBAMAZINE CITRATE	-2.46821	-2.01086
BRD-K45330754-001-21-7	Diethylstilbestrol	0.197019	0.590464
BRD-K94080537-001-09-7	DIETHYLTOLUAMIDE	0.378058	1.85737
BRD-A66869276-001-02-9	DIFLORASONE DIACETATE	0.0634083	0.883575
BRD-K73923631-003-02-9	DIFLOXACIN HYDROCHLORIDE	-0.849919	1.03067
BRD-K22031190-001-23-6	DIFLUNISAL	-2.04151	-0.110663
BRD-K33720171-001-01-0	Difluprednate	-3.13006	-2.93644
BRD-K18518344-001-15-9	Digitoxigenin	-2.82915	-2.75327
BRD-A93236127-001-04-5	DIGITOXIN	-1.93839	-1.19519
BRD-K18619710-001-14-4	Digoxigenin	-1.84711	-1.46769
BRD-A94756469-001-04-7	DIGOXIN	1.52146	3.24459
BRD-K38564664-001-01-1	dihydro-1H-pyrrolo[1,2-a]pyrrole-3,5(2H,6H)-dione	-1.50816	-0.699527
BRD-K62213621-001-01-6	Dihydroartemisinin (DHA)	-4.98509	-4.83953
BRD-K49811169-004-06-6	Dihydro-beta-erythroidine HBr	-2.52361	-0.906514
BRD-K97440753-066-19-9	Dihydroergocristine mesylate	-4.20749	-3.81493
BRD-K72166146-066-06-2	Dihydroergotamine mesylate	-5.32679	-2.5309
BRD-K01614093-001-04-2	Dihydromyricetin	1.9787	3.26277
BRD-K96123349-236-02-8	Dihydroorotate Dehydrogenase Inhibitor, Brequinar	-0.172896	0.277196
BRD-K93944989-001-08-0	Dihydrosphingosine	-2.88045	-2.34061
BRD-A67363467-001-01-3	DIHYDROSTREPTOMYCIN [5mM]	-2.35988	-2.04785
BRD-K22525962-001-05-0	Dihydrotestosterone	-0.811749	0.0740883
BRD-K37846922-001-09-4	Diindolylmethane	-3.32885	-2.87187
BRD-K56575995-001-03-0	diisopropyl fluoridophosphate	-0.425658	-0.0362693
BRD-K48722258-300-10-2	Dilazep	-3.46769	-3.12457
BRD-K10974103-001-21-1	DILOXANIDE FUROATE	0.798724	1.03371
BRD-A69636825-003-04-7	DILTIAZEM HYDROCHLORIDE	-1.47759	-0.863159
BRD-K24023109-003-28-6	Diltiazem hydrochloride	-3.40687	-3.10276
BRD-K23541596-300-07-2	Dimaprit 2HCl	0.66159	0.667321
BRD-K55703048-300-02-4	Dimebon dihydrochloride	-4.25411	-1.86245
BRD-K30126819-304-02-7	Dimesna	-2.58946	-1.2201
BRD-K73391359-003-10-2	Dimethisoquin hydrochloride	-4.18	-4.11436
BRD-K44471774-001-01-8	dimethyl 1,2,6-trimethyl-4-[4-(trifluoromethyl)phenyl]-1,4-dihydro-3,5-pyridinedicarboxylate	-0.011122	1.04521
BRD-K90168339-001-04-5	DIMETHYL 4,4-o-PHENYLENE-BIS (3-THIOPHANATE)	-2.8569	-2.77145
BRD-K36379990-001-01-1	dimethyl 4-[2-(difluoromethoxy)phenyl]-2,6-dimethyl-1,4-dihydro-3,5-pyridinedicarboxylate	-3.49626	-3.27437
BRD-K31111078-001-04-2	DIMETHYL FUMARATE	-0.75799	-0.531781
BRD-K72728560-001-01-4	DIMETRIDAZOLE	-1.46846	0.0188937
BRD-K92848252-001-01-9	DIMINAZENE ACETURATE	-0.818954	0.448429
BRD-K60567437-001-10-2	DIMPYLATE	-1.42194	-1.11564
BRD-K13662825-001-07-5	Dinaciclib (SCH727965)	-3.4608	-3.3168
BRD-K93240442-001-08-4	DINITOLMIDE	-1.70756	-1.47642
BRD-K81672972-001-03-1	Dinoprost	-2.88658	-2.25475
BRD-K37723606-001-01-5	Dioscin	-5.57719	-5.03714
BRD-K28690501-001-02-1	Diosgenin	1.83503	2.02519
BRD-K26862302-001-05-2	Diosmetin	3.62134	3.7592
BRD-K94436377-001-11-0	Diosmin	-1.93298	-1.19439
BRD-K22193694-001-13-6	DIOXYBENZONE	2.18113	3.41005
BRD-A30693873-003-12-8	DIPERODON HYDROCHLORIDE	-3.4386	-2.88856
BRD-K93441486-067-12-8	Diphemanil Methylsulfate	-0.0839216	0.41758
BRD-K47278471-003-26-3	DIPHENHYDRAMINE HYDROCHLORIDE	-3.52973	-2.43379
BRD-K65814004-003-02-9	Diphenyleneiodonium chloride	-5.69285	-5.17519
BRD-K22936972-003-23-6	DIPHENYLPYRALINE HYDROCHLORIDE	-1.19069	-0.224044
BRD-A47494775-003-11-3	Dipivefrin hydrochloride	-4.59752	-3.78145
BRD-K64838454-001-01-0	Dipraglurant	-0.839928	-0.383172
BRD-K86301799-001-34-8	Dipyridamole	-5.52439	-4.92293
BRD-K76812510-236-14-8	DIPYRONE	-0.978283	-0.314818
BRD-K52756523-001-25-4	Dirithromycin	0.0657209	1.02995
BRD-K71026158-304-01-0	disodium ({[(Z)-2-[((2S,3S)-2-{[(aminocarbonyl)oxy]methyl}-4-oxo-1-sulfonato-3-azetidinyl)amino]-1-(2-amino-1,3-thiazol-4-yl)-2-oxoethylidene]amino}oxy)acetate	-2.06108	-1.75292
BRD-K32842773-434-01-8	disodium (2S)-2-({4-[2-(2-amino-4-oxo-4,7-dihydro-3H-pyrrolo[2,3-d]pyrimidin-5-yl)ethyl]benzoyl}amino)pentanedioate heptahydrate	-2.21838	-2.09805
BRD-K11463116-304-02-7	disodium 1,3-propanedisulfonate	-0.609839	0.900376
BRD-K06467130-304-02-7	disodium 5-((2R)-2-{[(2R)-2-(3-chlorophenyl)-2-hydroxyethyl]amino}propyl)-1,3-benzodioxole-2,2-dicarboxylate	-1.9408	-1.14257
BRD-K20920669-304-09-1	Disodium Cromoglycate	1.43369	1.692
BRD-A29734509-011-13-6	DISOPYRAMIDE PHOSPHATE	-2.10035	-1.64387
BRD-K32744045-001-34-6	disulfiram	-6.53828	-6.52039
BRD-K40787673-001-02-1	D-LACTITOL MONOHYDRATE	-1.59451	-0.848305
BRD-A89594340-003-11-5	DL-Carnitine HCl	-0.11432	0.8458
BRD-M77041484-001-02-6	DL-TBOA	-2.00764	-1.63322
BRD-M01344114-348-01-0	DL-threo-2-methylisocitrate (sodium)	-3.04622	-2.62339
BRD-K26573499-300-02-1	DMAB-anabaseine dihydrochloride	-1.6423	-0.627031
BRD-K30374899-001-09-3	D-Mannitol	-1.75111	-1.62213
BRD-K36775483-001-01-4	DMeOB	-2.24228	-1.01127
BRD-K39381259-001-02-8	DMH-1	-5.02882	-2.76433
BRD-K40575944-001-01-5	DMH4	-3.45953	-1.82001
BRD-K03564313-001-03-3	DMNB	-0.739093	0.530385
BRD-K89274813-001-03-1	DMP 543	-2.92968	-2.55879
BRD-K54936858-001-01-6	DMP 777	-2.87267	-2.77668
BRD-K27938825-001-02-4	DMXAA (Vadimezan)	-0.962716	-0.18715
BRD-K64400208-001-09-1	DNQX	-2.44163	-2.17582
BRD-K17378184-300-05-9	DO 897/99	-6.32713	-5.55191
BRD-A78322124-003-16-5	Dobutamine hydrochloride	-4.12893	-3.43435
BRD-K30577245-341-01-9	DOCETAXEL	-3.94785	-3.69079
BRD-K91495480-001-02-2	Docosanoic acid	-1.49381	-0.927868
BRD-K50050533-001-02-1	Docosanol (Abreva)	-2.54195	-1.82956
BRD-A14941520-051-01-0	Dofequidar (fumarate)	-2.45433	-2.247
BRD-K86887724-001-12-2	Dofetilide	-5.32224	-4.2686
BRD-K28029915-001-02-2	Dolasetron	-1.05913	0.0682488
BRD-K28029915-066-03-3	Dolasetron mesylate	-2.19813	-0.525545
BRD-K78567475-001-01-4	Dolastatin 10	-5.12431	-4.00291
BRD-K36386086-001-01-1	Dolutegravir (GSK1349572)	-2.02175	-1.17994
BRD-K30431096-004-01-3	Domiphen Bromide	-8.3284	-7.80231
BRD-K38305202-001-17-4	Domperidone	-3.14871	-2.23851
BRD-A49160188-003-12-7	DONEPEZIL HYDROCHLORIDE	-2.16777	-2.00666
BRD-K31092604-003-03-5	Donitriptan hydrochloride	-2.72178	-2.46196
BRD-K43887077-003-26-3	DOPAMINE HYDROCHLORIDE	-2.16669	-1.82731
BRD-A16350940-001-01-9	DORAMECTIN	-7.03081	-4.90385
BRD-K54233340-300-05-1	Dorsomorphin dihydrochloride	0.403427	0.794237
BRD-K54759182-003-08-0	Dosulepin hydrochloride	-4.31094	-3.89902
BRD-A46179541-311-02-0	Doxapram HCl	-1.04042	-0.235328
BRD-A13188892-066-23-1	Doxazosin mesylate	-4.55991	-3.97344
BRD-K37694030-003-12-7	DOXEPIN HYDROCHLORIDE	-3.94419	-3.41631
BRD-K82928892-001-02-5	Doxercalciferol (Hectorol)	-4.33595	-3.33154
BRD-K58262659-001-09-7	Doxifluridine	0.205231	0.290347
BRD-K58262659-001-10-5	DOXIFLURIDINE	-0.636137	-0.546765
BRD-K70507123-001-09-7	DOXOFYLLINE	1.14829	1.83104
BRD-K92093830-001-05-4	DOXORUBICIN	-5.89075	-4.18589
BRD-K92093830-003-35-7	Doxorubicin (Adriamycin)	-7.97888	-7.26455
BRD-K92093830-003-34-0	Doxorubicin hydrochloride	-9.24732	-6.58267
BRD-A08545410-003-07-8	Doxycycline HCl	-3.60745	-3.15664
BRD-A44008656-036-25-8	DOXYLAMINE SUCCINATE	-2.12384	-1.8351
BRD-K29392254-001-03-0	D-Pantothenic acid	-3.48571	-3.10079
BRD-K37087535-001-01-1	DPC-681	-2.54376	-1.66182
BRD-K01824921-001-18-5	DPCPX	-2.1622	-1.63616
BRD-K00911807-001-04-0	D-Phenylalanine	-4.04447	-3.85794
BRD-A27143604-001-02-0	DPN	-1.21887	-1.01551
BRD-K99922388-001-02-0	DPO-1	-3.90622	-2.01083
BRD-K80315159-051-02-0	DPPE fumarate	-2.4312	-2.2797
BRD-A67976398-001-01-6	DQP 1105	-1.00794	-0.690973
BRD-A39794701-003-01-6	DR 4485 hydrochloride	-6.20585	-5.65885
BRD-A22267103-003-13-1	DROFENINE HYDROCHLORIDE	-6.58141	-4.78396
BRD-K05524748-003-04-4	Dronedarone HCl	-7.55169	-6.42382
BRD-K97158071-001-18-1	DROPERIDOL	-2.98191	-2.23576
BRD-A29349577-001-24-8	Dropropizine	-1.29834	-0.457178
BRD-K04394237-001-06-0	DROSPIRENONE	1.1077	1.18223
BRD-K04394237-001-04-5	Drospirenone	-2.13445	-1.12047
BRD-K11558771-001-13-9	Droxinostat	-3.70676	-1.91565
BRD-K09619578-001-02-1	DS2	-4.31603	-2.05632
BRD-K71822263-001-03-2	D-Serine	-1.56011	-1.22322
BRD-K46384285-001-01-3	DSR 6434	-3.97658	-2.36445
BRD-K33459542-001-07-4	DTG	0.727192	1.21569
BRD-A08840375-001-01-3	Dual Specificity Protein Phosphatase 1/6 Inhibitor, BCI	-5.26154	-3.44213
BRD-K06221026-001-07-6	DuP 697	-3.33578	-2.92943
BRD-K30373883-001-02-8	Dutasteride	-3.1085	-2.83734
BRD-K59424860-001-01-4	D-Valine	-1.44701	-1.18315
BRD-K58343622-001-01-6	DY131	-4.86734	-3.87695
BRD-K72259270-003-25-6	Dyclonine hydrochloride	-0.0930827	0.169541
BRD-K68620903-001-11-4	DYDROGESTERONE	-1.40156	0.0753514
BRD-K87718015-001-02-7	Dynasore	-2.65692	-0.83614
BRD-A00827783-001-24-6	DYPHYLLINE	-1.27865	-1.16731
BRD-K50564936-001-01-6	E 2012	-1.65544	0.474403
BRD-K31309378-001-01-5	E-3810	-1.10624	-1.01412
BRD-K41713976-300-03-4	E-4031 dihydrochloride	-5.42079	-2.67258
BRD-K06273313-001-07-9	E-64	1.70087	2.4758
BRD-K05444225-001-02-5	E7449	-2.31481	-1.85419
BRD-K53030960-001-01-4	Eact	-4.43289	-2.34522
BRD-K66998413-300-01-6	EB 47	-2.86359	-1.39029
BRD-K13314656-001-01-0	Ebastine	-3.88563	-2.98971
BRD-A96485169-001-14-3	EBPC	-1.01127	-0.842317
BRD-K29359156-001-30-1	EBSELEN	0.103617	1.12435
BRD-K40227168-001-12-9	Eburnamonine, (-)-	5.52199	6.80902
BRD-K41705163-001-01-1	EC 144	1.63366	3.56257
BRD-K81004638-001-02-5	EC 23	-3.19348	-2.82064
BRD-A47953250-001-01-7	ECAMSULE TRIETHANOLAMINE	-0.607796	-0.484312
BRD-A68969091-001-06-9	echinomycin	-5.38598	-5.38244
BRD-A51820102-008-28-9	ECONAZOLE NITRATE	-4.91935	-4.78915
BRD-A25182582-001-01-8	Edaglitazone	-3.07217	-1.37437
BRD-A78588743-001-03-4	EDITOL	-1.8486	-0.670519
BRD-K29322660-001-01-9	Edoxaban	-2.64402	-2.34873
BRD-K86892782-001-17-0	EDOXUDINE	-1.99534	-1.05822
BRD-K81128206-003-24-4	EDROPHONIUM CHLORIDE	-1.88773	-0.858929
BRD-K19002914-001-01-3	EED226	-2.80703	-2.47359
BRD-K37355418-236-01-6	Efaproxiral Sodium	-3.01764	-1.81874
BRD-A10739734-003-10-6	EFAROXAN HYDROCHLORIDE	-0.940381	-0.477714
BRD-K40758068-001-08-2	Efavirenz	1.66061	2.12265
BRD-A30774155-001-01-2	Efinaconazole	-0.911396	-0.496373
BRD-A96292436-003-16-1	EFLORNITHINE HYDROCHLORIDE	-1.89319	-0.869139
BRD-K55166090-001-09-0	EFLOXATE	-1.16297	-0.800222
BRD-M92675308-003-05-5	Efonidipine hydrochloride monoethanolate	-5.42619	-4.74342
BRD-K50653584-001-01-2	EG 00229	-2.96291	-1.74574
BRD-K22514639-001-05-7	EGF816	-5.8164	-3.74443
BRD-K32289541-001-01-0	EHop-016	-5.24727	-5.20989
BRD-K91535048-001-01-2	EI1	0.0890078	0.118298
BRD-K47192521-001-05-4	Eicosapentaenoic acid (20:5 n-3)	-0.013562	0.348781
BRD-K81623406-004-08-3	EIT hydrobromide	-2.95194	0.0336799
BRD-K88807631-001-02-1	elacridar	-2.06376	-1.7651
BRD-K03165895-001-01-9	Elafibranor	-1.79275	-1.42231
BRD-K09735259-001-01-3	Elbasvir	-7.96221	-7.34097
BRD-K82135108-001-04-3	Elesclomol (STA-4783)	-5.6787	-4.32645
BRD-K30652337-004-03-9	Eletriptan hydrobromide	-2.95581	-2.95044
BRD-K86410485-001-01-5	Eliglustat	-2.9779	-2.79032
BRD-K86410485-046-01-0	Eliglustat (hemitartrate)	-6.15831	-3.61663
BRD-A61392169-001-02-7	Eliprodil	-2.53889	-2.25585
BRD-K30466858-001-10-4	Ellagic acid	-1.1706	-0.964894
BRD-K50699835-001-01-2	ELN-441958	-1.9302	-1.7138
BRD-K40496271-396-01-1	Eltrombopag olamine	-3.88075	-3.23083
BRD-K39560679-001-01-1	Eluxadoline	-2.05735	-1.89579
BRD-K54472332-001-03-4	Elvitegravir (GS-9137, JTK-303)	-0.413977	0.405978
BRD-K86727142-001-12-4	Embelin	-5.11866	-3.47295
BRD-K43837174-003-02-1	EMD 281014 hydrochloride	-2.48617	-1.15156
BRD-K47659338-003-03-6	EMD 386088 hydrochloride	-6.9514	-4.89326
BRD-K88759641-003-03-6	EMD 66684	-3.29068	-1.42743
BRD-K97963946-001-01-3	EMD-1214063	-3.10818	-2.49179
BRD-K03067624-001-02-3	Emetine	-0.208897	0.0485777
BRD-A25687296-300-04-3	EMETINE DIHYDROCHLORIDE	-4.14429	-3.30966
BRD-K11540476-001-04-4	EMF-bca1-64	-2.97088	-2.71474
BRD-K58685305-001-20-4	Emodin	5.81563	5.83438
BRD-K53765467-001-02-1	Empagliflozin (BI 10773)	1.22325	2.19129
BRD-K61452026-001-04-6	Emtricitabine	-1.13954	-0.772002
BRD-K57545991-050-23-1	Enalapril Maleate	-1.44548	-1.28793
BRD-K70601687-001-01-3	Enasidenib	0.10504	0.463676
BRD-K61314889-001-06-9	endo-IWR 1	-3.44959	-1.41682
BRD-A11776908-065-01-5	ENILCONAZOLE SULFATE	-1.29563	-0.351269
BRD-K68488863-001-04-9	ENMD-2076	-5.34829	-4.7264
BRD-K78113049-001-16-2	ENOXACIN	0.391605	4.69905
BRD-K96137854-001-17-1	Enoxolone	-1.11371	-1.00522
BRD-K96137854-001-18-9	ENOXOLONE	-1.62431	0.741345
BRD-K76534306-001-22-7	ENROFLOXACIN	-1.94145	-1.11627
BRD-K83636919-001-05-5	Entacapone	0.0350797	0.267975
BRD-K08206212-002-01-0	Entecavir Hydrate	1.61751	2.53179
BRD-K77908580-001-09-6	Entinostat (MS-275)	11.2694	13.2059
BRD-K56851771-001-06-8	Enzalutamide (MDV3100)	-2.19525	-1.32422
BRD-K79404599-001-09-3	Enzastaurin (LY317615)	-1.6031	-0.153237
BRD-K42452249-001-02-5	EO 1428	-4.74352	-3.86677
[truncated: 3,441 more rows]

## Sheet: ALL
Compound ID	z-score (R) - 1	z-score (R) - 2
BRD-A00047421-001-01-7	-0.412981	0.236261
BRD-A00055058-001-01-0	-0.136497	0.592538
BRD-A00077618-236-07-6	-0.654643	-0.593994
BRD-A00100033-001-08-9	-0.0594786	0.715258
BRD-A00147595-001-01-5	-2.19502	-1.39859
BRD-A00218260-001-03-4	-5.21014	-4.73764
BRD-A00267231-001-01-1	0.73302	-0.825575
BRD-A00327403-103-01-9	-1.66393	-1.93713
BRD-A00376169-001-01-6	-1.35022	-0.0882004
BRD-A00520476-001-03-3	-1.4521	-2.08822
BRD-A00520476-001-07-4	-1.12415	-0.642329
BRD-A00520476-001-08-2	-2.82697	-2.82016
BRD-A00546892-001-01-8	-2.31612	-4.92647
BRD-A00546892-001-02-6	-5.60378	-4.34988
BRD-A00559310-003-02-9	-5.07517	-3.04978
BRD-A00578795-001-04-3	-0.977834	-0.160579
BRD-A00758722-001-03-1	-1.26434	-0.216394
BRD-A00758722-001-04-9	-3.60541	-3.17612
BRD-A00827783-001-15-4	-1.82771	-2.523
BRD-A00827783-001-24-6	-1.27865	-1.16731
BRD-A00993607-003-15-4	-4.74651	-10.8512
BRD-A00993607-003-24-6	0.99227	1.46004
BRD-A01078468-001-08-0	-2.21211	-2.5585
BRD-A01098288-001-02-9	0.499622	-0.800553
BRD-A01098288-001-06-0	-0.488945	0.270106
BRD-A01307728-001-01-4	-4.29383	-2.13832
BRD-A01320529-001-05-9	-4.87472	-9.85834
BRD-A01346607-001-03-4	-0.521197	-3.07028
BRD-A01412266-001-01-0	-0.684982	-0.569142
BRD-A01493904-003-05-5	-4.16121	-9.30796
BRD-A01493904-003-12-1	-3.70697	-3.24268
BRD-A01563671-001-02-7	-2.4312	-2.09805
BRD-A01593789-001-02-3	-3.54804	-8.82233
BRD-A01593789-001-03-1	-2.67079	-2.24003
BRD-A01636364-003-08-6	-3.34753	-3.9734
BRD-A01636364-003-15-1	-2.97282	-2.62132
BRD-A01643550-001-04-9	-0.30636	0.307713
BRD-A01787639-003-17-7	-2.6025	-2.39814
BRD-A01787639-300-04-5	-1.70313	-1.08273
BRD-A01907367-001-01-7	-0.711402	-0.82571
BRD-A02006392-001-09-9	-1.20839	-1.96008
BRD-A02006392-001-16-4	-1.03077	-1.00753
BRD-A02006392-001-19-8	-2.13484	-2.08539
BRD-A02180903-001-03-7	-0.29265	-1.96951
BRD-A02180903-001-04-5	2.87655	4.91577
BRD-A02232681-001-01-8	-2.39232	-2.01945
BRD-A02267565-001-02-3	-8.10278	-11.692
BRD-A02309928-001-04-1	-1.17367	-0.729213
BRD-A02367930-001-03-7	-2.05194	-3.26341
BRD-A02473266-001-01-1	-7.80847	-6.86943
BRD-A02508087-001-01-1	-2.30465	-2.30493
BRD-A02532772-003-01-7	-5.41462	-4.25574
BRD-A02710418-003-11-8	-2.91323	-1.26431
BRD-A02743701-001-03-6	-4.4177	-3.06746
BRD-A02743701-001-04-4	-3.34708	-2.06798
BRD-A02743701-001-06-9	-4.51353	-3.07103
BRD-A02759312-003-11-2	-0.694	-2.57385
BRD-A02759312-003-24-5	-3.25797	-1.37462
BRD-A02799884-001-03-7	-1.72093	-3.22792
BRD-A02933148-001-01-8	-1.78461	-1.23553
BRD-A02990301-003-06-6	-2.73589	-2.46608
BRD-A03061970-003-07-3	-1.16072	-0.811749
BRD-A03204438-001-02-0	-4.98876	-3.1029
BRD-A03216249-003-12-8	0.233135	-0.717596
BRD-A03216249-003-24-3	-1.93528	-1.57629
BRD-A03359064-001-01-5	-1.98517	-2.65184
BRD-A03359064-001-02-3	-3.6293	-1.18251
BRD-A03397678-001-06-2	-2.03771	-1.32109
BRD-A03506276-001-01-5	1.60958	1.93015
BRD-A03623303-045-05-3	-2.18008	-2.60414
BRD-A03623303-045-09-5	-0.675335	-0.525674
BRD-A03684405-001-01-4	-2.35763	-3.63683
BRD-A03757454-001-03-4	-3.18966	-2.85259
BRD-A03816571-001-01-0	-2.72304	-4.59193
BRD-A03880619-001-01-0	-8.84504	-7.77405
BRD-A03880619-001-02-8	-2.44163	-1.78017
BRD-A03932035-004-03-5	-1.13364	-1.01681
BRD-A03932035-004-04-3	-2.66812	-2.53828
BRD-A04026261-001-01-0	-1.30855	-1.19909
BRD-A04203391-001-08-3	-2.69972	-2.30807
BRD-A04231641-003-01-3	-1.64163	-3.6962
BRD-A04252265-003-01-4	-2.89005	-2.08086
BRD-A04258855-003-01-7	-3.52574	-5.94091
BRD-A04260165-004-02-4	-2.14093	-2.93378
BRD-A04322457-003-17-9	-1.56542	-0.736898
BRD-A04322457-003-18-7	-4.53825	-3.22484
BRD-A04327189-001-15-1	0.827721	0.537637
BRD-A04327189-003-03-3	1.02524	1.65124
BRD-A04352665-001-05-3	-1.98243	-1.70569
BRD-A04497688-001-04-2	-1.76373	-1.75338
BRD-A04506385-001-01-2	-0.921605	-0.381578
BRD-A04553218-050-08-9	-3.55361	-9.42667
BRD-A04553218-050-16-2	-1.92307	-1.02315
BRD-A04585598-003-03-1	-2.24605	-1.76309
BRD-A04649065-001-01-7	1.16217	6.86941
BRD-A04661934-001-01-1	-2.31612	-5.54161
BRD-A04661934-001-02-9	-0.216527	0.797481
BRD-A04706586-236-01-7	-2.23199	-2.10418
BRD-A04756508-001-01-5	-2.59483	-4.73222
BRD-A04971881-003-01-3	-0.652125	-0.641346
BRD-A04975445-001-03-3	-4.77482	-3.89226
BRD-A05186015-003-09-9	-7.11559	-16.0529
BRD-A05186015-003-19-8	-2.58208	-2.31292
BRD-A05186015-003-21-4	-2.44644	-0.976485
BRD-A05334458-001-02-8	0.020454	0.107823
BRD-A05352148-004-02-0	-0.916523	-1.04723
BRD-A05422420-001-03-4	-1.29737	-2.01586
BRD-A05457250-001-04-3	-3.50902	-7.23593
BRD-A05457250-001-08-4	-0.573509	-0.390444
BRD-A05515753-001-03-2	-1.94964	-3.46846
BRD-A05515753-001-04-0	-4.69418	-3.67828
BRD-A05523972-001-01-5	-1.18933	-0.146814
BRD-A05666893-001-03-4	-0.279406	-1.24502
BRD-A05674712-001-02-9	-1.848	-1.61481
BRD-A05674712-001-06-0	-2.28989	-1.51947
BRD-A05729358-001-02-0	-1.20716	-1.26411
BRD-A05729358-001-03-8	-3.13291	-2.82323
BRD-A05906449-004-01-1	1.23556	1.68035
BRD-A05987535-001-03-8	-1.79567	-0.839309
BRD-A05994177-003-02-5	-2.97381	-3.35977
BRD-A06232236-001-03-0	-4.88516	-7.25964
BRD-A06276885-003-01-1	-5.72146	-7.12538
BRD-A06352418-001-15-0	-2.46105	-4.91568
BRD-A06352418-001-25-9	-1.69066	-1.82397
BRD-A06352418-001-27-5	-7.35257	-4.74451
BRD-A06352508-001-03-7	-8.25121	-5.49954
BRD-A06352508-001-05-2	0.91216	1.86416
BRD-A06390036-001-03-8	-4.22253	-9.254
BRD-A06390036-001-04-6	-7.90526	-5.43042
BRD-A06426627-001-03-5	1.01154	1.5366
BRD-A06561405-001-03-7	-4.8816	-6.1693
BRD-A06627858-236-03-0	-11.5265	-7.81235
BRD-A06700447-001-01-5	-3.98893	-2.46008
BRD-A06771424-004-01-7	-0.0222341	1.07379
BRD-A06916187-001-02-9	-1.02336	-0.354081
BRD-A06935312-001-03-5	-3.51482	-4.23711
BRD-A06935312-001-04-3	0.334934	1.1986
BRD-A07000685-001-03-6	-3.17669	-4.53632
BRD-A07000685-001-04-4	-1.1573	0.486009
BRD-A07164067-001-01-2	0.178943	0.538292
BRD-A07195938-001-01-3	-1.96389	-2.37513
BRD-A07207424-001-09-0	-3.09838	-1.74201
BRD-A07207424-001-13-2	-0.954621	-0.289257
BRD-A07207424-001-14-0	-2.84653	-2.18348
BRD-A07232941-001-01-9	-0.543494	-1.38675
BRD-A07232941-001-02-7	-1.67412	0.0830828
BRD-A07232941-001-03-5	-2.71848	-1.98365
BRD-A07395371-003-10-0	-1.61298	-1.13224
BRD-A07440155-003-16-3	-3.95496	-7.71077
BRD-A07440155-003-25-4	-1.70906	-1.57223
BRD-A07563059-035-01-3	-1.23737	-0.844977
BRD-A07600638-060-03-7	-3.01652	-3.17213
BRD-A07600638-060-05-2	-1.59969	-2.61246
BRD-A07600638-060-06-0	-0.828016	0.00833241
BRD-A07704283-001-01-3	-6.95355	-5.56274
BRD-A07780951-001-08-9	-1.87199	0.665577
BRD-A07780951-065-10-0	-3.79482	-1.85298
BRD-A07815743-001-01-1	-2.76372	-1.92787
BRD-A07870296-001-07-4	-2.53269	-2.29617
BRD-A07875874-001-01-6	-3.71527	-7.99135
BRD-A07893380-001-04-0	-2.16191	-2.03636
BRD-A07893380-213-01-7	-2.19372	-1.73102
BRD-A07932845-050-15-8	-5.14661	-1.48167
BRD-A07932845-050-16-6	-4.96322	-4.75317
BRD-A07932845-103-01-5	-6.12336	-12.675
BRD-A07947329-001-01-4	-0.413305	0.35821
BRD-A07986123-001-02-8	-0.277772	0.369947
BRD-A08079565-001-01-8	-1.45307	-1.4174
BRD-A08187463-001-12-9	-7.4842	-4.69728
BRD-A08255417-001-06-3	-3.79957	-5.06882
BRD-A08255417-001-14-7	-4.98159	-4.88587
BRD-A08302182-001-01-7	-3.83886	-3.14414
BRD-A08316590-001-01-3	0.0569165	2.19212
BRD-A08545410-003-03-7	-2.97025	-4.03426
BRD-A08545410-003-07-8	-3.60745	-3.15664
BRD-A08545410-003-08-6	-1.23049	0.563704
BRD-A08545410-311-01-8	-0.823144	-2.0488
BRD-A08545410-311-03-4	-8.86324	-6.19112
BRD-A08660406-001-03-4	-2.08162	-1.85799
BRD-A08660406-001-05-9	-2.92871	-3.55928
BRD-A08715367-001-01-7	0.767773	1.04076
BRD-A08772153-001-02-4	-2.54191	-2.53828
BRD-A08840375-001-01-3	-5.26154	-3.44213
BRD-A09004963-001-01-3	-2.42601	-2.13699
BRD-A09056319-001-05-5	-2.68402	-5.2826
BRD-A09056319-003-07-7	-2.9966	-1.87511
BRD-A09062839-003-10-0	-0.853748	-0.744246
BRD-A09094913-001-03-1	-3.54685	-4.59211
BRD-A09094913-065-01-0	-1.7387	-0.522912
BRD-A09349126-001-06-5	-0.603303	-1.50873
BRD-A09349126-001-10-7	-3.02735	-1.22038
BRD-A09368919-001-01-7	-1.73226	-1.47946
BRD-A09370961-001-01-0	-1.02965	-0.929925
BRD-A09467419-003-14-1	-3.79888	-7.94819
BRD-A09467419-003-22-4	-3.62936	-2.97738
BRD-A09472452-015-11-9	-3.82675	-8.01294
BRD-A09472452-015-23-4	-2.81333	-1.27931
BRD-A09472452-015-26-7	-3.76594	-2.82323
BRD-A09487507-001-02-1	-2.5132	-2.30402
BRD-A09495397-001-03-5	-2.00567	-2.52807
BRD-A09533288-003-31-2	-3.88095	-2.53419
BRD-A09539288-004-03-6	-2.39364	-4.24219
BRD-A09554849-236-07-6	0.755308	1.03505
BRD-A09722536-002-18-0	-0.922809	-1.43299
BRD-A09722536-002-19-8	-2.44508	-1.87281
BRD-A09735281-001-02-5	-1.01114	-2.33932
BRD-A09735281-001-03-3	-3.65793	-3.34796
BRD-A09828896-004-04-5	-1.79771	-4.94806
BRD-A09828896-004-11-0	-2.14986	-3.87577
BRD-A09828896-004-12-8	-4.00172	-3.39667
BRD-A09925278-003-05-6	-1.74318	-1.11636
BRD-A09977907-001-01-9	-3.34753	-4.21176
BRD-A10039652-001-01-2	-2.37625	-2.45413
BRD-A10039652-001-02-0	-2.00296	-1.8724
BRD-A10070317-003-17-6	-6.66837	-8.68469
BRD-A10070317-003-28-3	-3.42553	-2.59547
BRD-A10111329-001-04-6	-1.61471	-1.2507
BRD-A10188456-001-03-1	1.25143	-0.426278
BRD-A10188456-001-04-9	1.18042	1.61462
BRD-A10355991-003-01-8	-1.75312	-5.35815
BRD-A10420615-001-03-6	-2.2987	-2.04348
BRD-A10420615-001-04-4	0.113963	-2.36279
BRD-A10523515-001-07-9	2.49734	2.0056
BRD-A10523515-001-10-3	-3.30061	-1.7033
BRD-A10652366-238-02-5	-2.9654	-2.23234
BRD-A10652366-238-04-1	-2.58879	-2.2736
BRD-A10662413-043-11-2	-3.73609	-3.62668
BRD-A10715913-001-03-8	-2.91686	-3.65898
BRD-A10739734-003-05-6	-2.4933	-3.22284
BRD-A10739734-003-10-6	-0.940381	-0.477714
BRD-A10773072-001-03-4	-1.15406	-0.848663
BRD-A10903566-003-02-8	-3.8825	-6.31862
BRD-A10903566-003-07-7	-1.83356	-1.27701
BRD-A10967948-003-06-3	-0.177818	-0.0412944
BRD-A10977446-001-05-5	-5.64955	-12.6211
BRD-A10977446-001-12-1	-3.29923	-4.43643
BRD-A10977446-001-17-0	-2.70519	-2.63008
BRD-A11070335-236-02-1	-2.55856	-1.40582
BRD-A11132253-001-08-2	1.4044	3.15088
BRD-A11319535-001-02-8	-3.62516	-4.14076
BRD-A11551002-001-03-8	-1.62483	-1.34644
BRD-A11551002-001-04-6	-2.40563	-1.63347
BRD-A11609859-303-01-2	-2.97946	-6.64237
BRD-A11662333-001-03-3	-2.48663	-1.75447
BRD-A11678676-001-03-4	-1.63197	-1.26251
BRD-A11725667-001-01-8	-0.13239	-0.0740889
BRD-A11731518-001-01-7	-2.62838	-1.54507
BRD-A11776908-001-06-9	-1.68533	-2.94392
BRD-A11776908-065-01-5	-1.29563	-0.351269
BRD-A11813248-003-01-6	-2.61787	-3.65391
BRD-A11813248-003-02-4	-0.877971	-1.31532
BRD-A11813248-003-03-2	-2.58753	-2.29263
BRD-A11815689-001-01-1	-0.274005	0.0686632
BRD-A11990600-001-03-4	-1.85177	-1.04614
BRD-A12055418-001-03-7	-3.12686	-4.5414
BRD-A12077521-003-01-5	-1.79984	-1.53744
BRD-A12147465-003-01-4	5.99709	7.91548
BRD-A12230535-001-06-7	-2.95089	-3.65111
BRD-A12230535-001-11-7	-2.41669	-2.05383
BRD-A12237696-001-04-2	1.09721	1.536
BRD-A12372458-001-03-7	-2.26194	-3.34963
BRD-A12417644-001-07-6	-2.66005	0.136112
BRD-A12454076-001-01-9	-0.147404	0.0955331
BRD-A12490291-001-01-2	-1.52247	-0.470543
BRD-A12490356-001-03-0	-2.2833	-3.88212
BRD-A12633378-001-07-0	-0.523019	0.359861
BRD-A12822115-003-01-6	-3.78523	-4.43895
BRD-A12896037-001-04-3	-3.42158	-2.81886
BRD-A12994259-001-02-1	-0.641222	-0.562114
BRD-A13084692-001-20-7	-4.57525	-2.67789
BRD-A13116749-003-01-6	-4.37688	-2.78066
BRD-A13133631-001-03-2	-1.04466	-1.42759
BRD-A13133631-001-04-0	2.89507	5.27823
BRD-A13188892-066-13-2	-2.53245	-2.95406
BRD-A13188892-066-21-5	-3.82384	-1.51068
BRD-A13188892-066-23-1	-4.55991	-3.97344
BRD-A13293292-001-02-6	-4.71151	-3.95205
BRD-A13323580-001-03-0	-2.31533	-2.4875
BRD-A13323580-001-04-8	-2.01763	-0.175152
BRD-A13561534-003-02-0	-2.20411	-2.03467
BRD-A13569698-001-03-7	-3.34042	-4.46532
BRD-A13598753-001-01-2	-2.4351	-0.911448
BRD-A13598753-001-02-0	-4.70486	-2.31132
BRD-A13689093-001-01-8	-1.81117	-1.50306
BRD-A13912374-003-03-6	-2.65703	-3.70462
BRD-A13946108-001-08-0	-2.14805	-3.41556
BRD-A13946108-001-17-1	-0.946312	-2.03593
BRD-A13946108-001-19-7	-2.05061	-1.32603
BRD-A13964793-001-01-8	-3.79799	-5.06732
BRD-A13964793-001-02-6	-3.61899	-3.07996
BRD-A14098586-001-03-1	-3.2972	-4.13867
BRD-A14208071-004-10-7	-1.86686	-3.11635
BRD-A14208071-004-19-8	-1.56851	-0.64123
BRD-A14240607-003-26-1	0.296834	-0.563511
BRD-A14240607-003-27-9	-4.25238	-3.48578
BRD-A14262390-065-01-8	-0.696874	0.398666
BRD-A14316475-001-01-5	-2.88838	-3.67419
BRD-A14316475-001-02-3	-0.287492	0.314834
BRD-A14344385-001-02-4	-1.73639	-5.40131
BRD-A14344385-001-03-2	-1.30055	-2.32007
BRD-A14344385-001-04-0	-3.94935	-3.79985
BRD-A14395271-074-17-8	-4.35131	-3.99724
BRD-A14566392-004-03-5	-2.06528	-3.8365
BRD-A14574269-051-01-4	-3.6276	-3.29117
BRD-A14574269-051-03-0	-1.45445	-1.40511
BRD-A14798026-001-01-8	-1.35076	-1.56958
BRD-A14886633-001-01-6	-0.706836	0.713135
BRD-A14941520-051-01-0	-2.45433	-2.247
BRD-A14966924-001-03-0	-2.45548	-5.26102
BRD-A14966924-003-07-7	-0.901073	0.242266
BRD-A15035311-001-01-8	-1.95801	-1.28133
BRD-A15131297-003-01-9	-0.56771	-0.671954
BRD-A15202882-003-02-7	-2.38728	-1.92892
BRD-A15297126-001-03-5	-2.55025	-3.26849
BRD-A15297126-001-04-3	2.08588	2.64988
BRD-A15397381-001-02-5	-1.13408	-0.200107
BRD-A15397381-001-03-3	-1.85327	-1.8035
BRD-A15415227-003-01-1	-3.50414	-3.14044
BRD-A15415227-003-02-9	-1.03621	0.110572
BRD-A15435692-003-01-5	-2.79551	-6.28624
BRD-A15435692-003-02-3	-2.07095	-2.06819
BRD-A15454510-001-03-6	-3.23008	-4.56168
BRD-A15530910-001-01-3	-4.31172	-7.55968
BRD-A15530910-001-02-1	-3.59707	-2.91547
BRD-A15670677-001-01-0	-2.5111	-3.72491
BRD-A15687940-001-05-6	-2.45045	-2.26465
BRD-A15739803-001-01-0	-1.68389	-1.63082
BRD-A15798299-001-02-5	-2.29754	-3.71984
BRD-A15909516-001-03-3	-3.47567	-4.18133
BRD-A15909516-001-06-6	-0.822028	-0.603539
BRD-A15931911-001-03-8	-1.58213	-1.54296
BRD-A16263897-001-06-6	-2.43379	-2.25305
BRD-A16296925-001-01-3	-0.967214	-0.731488
BRD-A16332958-001-04-0	-1.83673	-3.29691
BRD-A16347691-001-13-1	0.972534	2.4189
BRD-A16350940-001-01-9	-7.03081	-4.90385
BRD-A16376407-001-02-8	-4.00546	-3.09899
BRD-A16439188-001-01-1	7.15661	8.01164
BRD-A16560607-001-02-5	-2.37691	-1.42743
BRD-A16665823-001-01-2	-4.70007	-6.67136
BRD-A16665823-001-02-0	-4.43747	-4.41355
BRD-A16694057-001-03-5	-0.921306	-1.93123
BRD-A16694057-001-06-8	-0.874338	-0.610646
BRD-A16700644-003-03-6	-3.20872	-5.03839
BRD-A16700644-003-04-4	-1.47753	-1.44283
BRD-A16827030-001-01-7	-0.25363	-0.253608
BRD-A16997652-001-02-3	-0.441002	0.085707
BRD-A17009129-001-01-3	-1.06312	-0.882726
BRD-A17120244-001-03-4	-2.2655	-3.64377
BRD-A17300716-001-01-5	2.49377	2.61566
BRD-A17407635-001-04-0	-1.01365	-0.678247
BRD-A17411484-001-05-1	-2.33842	-5.07756
BRD-A17411484-001-11-9	-0.074937	0.965097
BRD-A17428743-003-03-3	-6.54701	-14.0995
BRD-A17428743-003-09-0	-4.80271	-3.91204
BRD-A17428743-003-10-8	-4.06739	-3.7361
BRD-A17453586-003-01-5	-2.57254	-5.8222
BRD-A17453586-003-02-3	-3.63579	-2.46859
BRD-A17462676-003-06-6	-0.727879	-0.890022
BRD-A17462676-003-11-6	-0.44969	0.0929264
BRD-A17655518-001-12-9	-2.45771	-3.19242
BRD-A17655518-001-24-4	2.23547	3.50228
BRD-A17745711-103-01-0	-2.60041	-5.64953
BRD-A17831693-001-03-2	-0.382626	0.464029
BRD-A17846016-001-03-0	-2.33643	-2.22492
BRD-A17846016-001-07-1	-0.734998	-0.39303
BRD-A17846016-001-13-9	-1.45972	-2.42672
BRD-A17883755-001-06-1	0.682402	0.739313
BRD-A18043272-001-09-9	0.794662	1.52216
BRD-A18056626-003-22-3	1.45965	1.91277
BRD-A18074780-003-02-0	-2.76237	-1.83032
BRD-A18074780-003-03-8	-1.88013	-1.9643
BRD-A18202423-001-01-6	-1.31275	-1.33279
BRD-A18233884-003-02-7	-3.09502	-2.49355
BRD-A18279961-001-01-2	-1.10037	-0.566115
BRD-A18396475-001-15-3	-4.86568	-2.25618
BRD-A18396475-001-16-1	-2.72288	-2.26864
BRD-A18477699-001-01-1	-1.71121	-1.40707
BRD-A18573497-001-01-1	0.0622606	-0.591972
BRD-A18579359-001-04-9	-8.35858	-5.64234
BRD-A18611368-001-01-5	-0.371818	0.770902
BRD-A18620900-001-04-5	-2.98448	-3.87198
BRD-A18627414-001-04-9	-1.98115	-1.86694
BRD-A18696154-003-14-3	-4.55541	-4.31815
BRD-A18696154-003-22-6	-3.78015	-2.96384
BRD-A18763547-300-05-5	-8.91883	-9.79574
BRD-A18763547-300-06-3	-9.44482	-6.56674
BRD-A18788061-001-03-7	-7.91057	-11.4283
BRD-A18795974-004-02-4	-2.08398	-0.753096
BRD-A18795974-004-07-3	-0.971372	0.0645836
BRD-A18795974-004-08-1	-4.23368	-4.18043
BRD-A18795974-004-09-9	-0.846726	-0.566178
BRD-A18917088-001-03-1	-1.73082	-2.75731
BRD-A18992208-003-02-7	0.399884	1.69566
BRD-A19053834-050-09-5	-2.89385	-2.21431
BRD-A19102171-066-01-4	-2.90878	-2.04485
BRD-A19102171-066-02-2	-3.50218	-2.68481
BRD-A19195498-050-09-1	-7.10444	-15.6967
BRD-A19195498-050-14-1	-4.76408	-4.12578
BRD-A19374631-001-01-0	-3.92152	-7.60285
BRD-A19585813-003-01-7	-1.83673	-3.95521
BRD-A19585813-003-03-3	-1.37945	0.0139106
BRD-A19609491-001-01-8	-3.92634	-2.79616
BRD-A19633847-050-32-1	-5.08877	-5.08211
BRD-A19661776-003-16-9	-2.79584	-4.02412
BRD-A19661776-003-27-6	-2.88097	-1.77039
BRD-A19736161-001-06-7	-2.41363	-1.7387
BRD-A19777893-236-01-9	-0.33799	0.0899429
BRD-A19795905-001-05-6	-5.49844	-2.84365
BRD-A19795905-001-08-0	0.20831	0.561661
BRD-A19952358-001-11-3	-2.07464	-1.35592
BRD-A19958636-065-04-4	-0.246638	1.7859
BRD-A20119038-003-07-8	-1.28773	-0.553281
BRD-A20126139-001-03-4	-2.20855	-3.12649
BRD-A20182314-001-03-4	-1.57856	-0.529956
BRD-A20239487-001-15-7	-2.69262	-3.17213
BRD-A20239487-001-24-9	-0.240902	0.6883
BRD-A20243730-001-01-4	-3.69297	-7.38701
BRD-A20256229-001-04-8	-2.42923	-3.48148
BRD-A20348246-001-08-3	-1.17279	-1.89415
BRD-A20348246-001-15-8	-0.433441	2.04124
BRD-A20368188-001-03-2	-4.7855	-6.67136
BRD-A20527803-001-01-2	-1.22913	-2.45514
BRD-A20550616-001-02-9	-3.82341	-3.16712
BRD-A20550616-001-03-7	-2.07153	-1.86147
BRD-A20644369-001-04-5	-3.40229	-3.11851
BRD-A20644369-001-08-6	-2.39834	-0.975566
BRD-A20758144-001-02-9	-1.67093	-1.13583
BRD-A20758144-001-04-5	-0.787639	-1.28972
BRD-A20781140-001-01-7	0.408057	1.90476
BRD-A20781140-001-02-5	-1.95438	-1.71312
BRD-A20839672-003-01-5	1.66612	2.68847
BRD-A20968261-001-01-3	-1.4521	-6.12437
BRD-A21113731-001-03-3	-2.46482	-4.0089
BRD-A21276153-001-01-1	-3.5427	-2.75396
BRD-A21280314-001-06-8	-1.26973	-0.973868
BRD-A21423998-001-03-4	-2.05194	-2.43171
BRD-A21428877-003-01-9	-6.17719	-7.99499
BRD-A21446384-001-01-1	-3.11095	-1.11564
BRD-A21474126-001-01-6	-2.86146	-2.45045
BRD-A21544762-303-01-5	-2.36643	-1.89097
BRD-A21607826-003-06-9	-5.87666	-4.66215
BRD-A21723284-066-01-7	-3.78216	-8.42303
BRD-A21858158-001-23-5	-2.06946	-1.6391
BRD-A22032524-074-04-0	-7.07657	-15.7939
BRD-A22032524-074-06-5	-6.12003	-4.95603
BRD-A22032524-074-10-7	-7.40812	-5.1217
BRD-A22081593-001-06-1	-1.72805	-1.68622
BRD-A22081593-001-11-1	-0.201097	0.545204
BRD-A22106989-001-02-7	-3.56435	-2.66215
BRD-A22106989-001-05-0	-1.69087	-3.09684
BRD-A22128695-001-01-8	-2.85635	-3.34456
BRD-A22143024-231-02-0	-1.21798	-3.19978
BRD-A22143024-231-03-8	1.28767	1.95608
BRD-A22152765-003-10-0	0.0902158	0.161668
BRD-A22256192-003-14-4	-2.21211	-3.14677
BRD-A22256192-003-22-7	-1.60424	-1.13224
BRD-A22267103-003-08-1	-3.62872	-4.72904
BRD-A22267103-003-13-1	-6.58141	-4.78396
BRD-A22305049-003-08-6	-3.5077	-4.46532
BRD-A22305049-003-13-6	-1.69751	-1.46692
BRD-A22380646-001-02-3	-2.48262	-3.74012
BRD-A22380646-236-05-8	-0.887477	0.413237
BRD-A22502289-001-01-6	-0.798007	0.0709989
BRD-A22642447-001-02-7	-3.48901	-1.55162
BRD-A22684332-003-03-1	-2.22693	-1.95872
BRD-A22707317-001-02-5	-6.32961	-14.0456
BRD-A22707317-001-10-8	-12.5991	-16.8358
BRD-A22707317-001-11-6	-5.24382	-5.18273
BRD-A22713669-001-01-9	-5.86189	-7.21185
BRD-A22713669-001-04-3	-7.66121	-6.05667
BRD-A22769835-300-05-7	-4.91098	-4.29964
BRD-A22783572-065-01-3	-5.67039	-6.88902
BRD-A22844106-001-16-1	-1.87018	-3.3077
BRD-A22844106-001-26-0	-1.65718	-0.56244
BRD-A22963354-001-03-6	-6.43702	-8.7709
BRD-A23021424-001-01-2	-0.478804	-0.451811
BRD-A23034328-003-06-7	-2.1694	-2.90842
BRD-A23067620-001-01-7	-2.59652	-3.23806
BRD-A23067620-001-04-1	-3.65897	-2.98529
BRD-A23072235-050-09-4	-2.58228	-3.96833
BRD-A23072235-050-18-5	0.469259	0.623653
BRD-A23127772-001-02-3	1.28712	3.08476
BRD-A23155040-051-01-7	-4.22963	-1.99788
BRD-A23226398-001-04-3	-1.73639	-6.80425
BRD-A23359898-003-10-0	-3.03315	-1.87293
BRD-A23359898-003-11-8	-0.892793	-0.353488
BRD-A23418262-001-01-5	1.88749	3.13706
BRD-A23603052-001-02-4	-1.92381	-2.59907
BRD-A23603052-001-03-2	-1.61576	-2.95479
BRD-A23683907-334-01-0	-2.04298	-4.31134
BRD-A23723433-001-01-2	-3.75544	-4.55425
BRD-A23970436-236-03-4	-2.16228	-3.1062
BRD-A24122750-001-02-9	-2.34381	-3.07577
BRD-A24122750-001-03-7	-0.230448	0.0204727
BRD-A24191444-046-03-9	-3.88273	-3.74957
BRD-A24228527-001-19-0	-2.56804	-2.86785
BRD-A24228527-213-01-9	-2.23253	-1.35071
BRD-A24284985-001-09-9	-1.4552	-0.00380729
BRD-A24284985-003-03-8	-2.40076	-3.76041
BRD-A24297246-001-03-9	-0.704381	-0.14768
BRD-A24397426-001-10-4	-1.25274	-0.90788
BRD-A24429032-003-01-6	-2.4722	-4.64589
BRD-A24433358-001-04-2	-1.69957	-2.34043
BRD-A24514565-001-09-7	-3.2957	2.80769
BRD-A24514565-236-01-6	-2.36816	-1.89664
BRD-A24543851-001-05-7	-0.879186	-1.93946
BRD-A24560335-300-01-2	-4.7264	-3.4699
BRD-A24587114-066-14-2	-2.56093	-2.75628
BRD-A24587114-066-22-5	-1.34172	-0.943483
BRD-A24857382-001-03-4	0.199541	0.969519
BRD-A25004090-001-08-4	-0.265506	-0.036275
BRD-A25043798-001-01-2	-8.52522	-6.19485
BRD-A25143711-001-01-4	-2.53601	-3.58291
BRD-A25143711-001-02-2	0.0413496	1.53057
BRD-A25182582-001-01-8	-3.07217	-1.37437
BRD-A25234499-001-09-2	-3.35465	-4.87103
BRD-A25234499-001-18-3	0.515041	-0.107336
BRD-A25234499-001-19-1	-3.93618	-2.58747
BRD-A25243629-001-03-9	-6.50108	-9.82574
BRD-A25408073-001-03-9	-4.00957	-4.76961
BRD-A25537246-001-03-7	-3.02364	-3.67927
BRD-A25569250-001-03-3	-1.85258	-0.531136
BRD-A25608658-001-01-1	-11.428	-7.39788
BRD-A25619068-003-03-4	-0.470472	-0.0532042
BRD-A25687296-300-03-5	-6.48569	-14.3477
BRD-A25687296-300-04-3	-4.14429	-3.30966
BRD-A25706161-001-03-9	-2.02703	-3.44091
BRD-A25800195-001-01-4	-3.21415	-3.01272
BRD-A25800195-001-02-2	-2.53421	-1.44729
BRD-A26032986-050-01-3	-4.0776	-9.42667
BRD-A26032986-050-02-1	-1.2449	-1.29895
BRD-A26032986-050-03-9	-6.1015	-2.52029
BRD-A26095496-001-03-2	1.2793	3.18899
BRD-A26097136-001-01-8	-3.1384	-3.3148
BRD-A26105646-001-06-1	-2.24144	-2.11467
BRD-A26334849-001-06-2	-3.40354	-2.10309
BRD-A26334849-003-16-7	-5.40985	-11.2829
BRD-A26384407-001-15-2	-2.78436	-7.08484
BRD-A26384407-001-25-1	-1.53086	-0.977834
BRD-A26387268-050-03-6	-1.69567	-1.62959
BRD-A26387268-050-04-4	0.632749	1.77717
BRD-A26458246-004-02-1	-3.04134	-2.09013
BRD-A26503646-001-16-6	-1.72798	-1.61486
BRD-A26503646-001-18-2	-1.85752	-1.58943
BRD-A26690767-066-01-9	-1.97786	-1.91879
BRD-A26711594-003-06-4	-3.14669	-7.10642
BRD-A26711594-003-10-6	-2.68286	-1.48704
BRD-A26845397-051-01-9	-1.39897	-0.866795
BRD-A26858303-001-01-0	-1.20008	-1.08527
BRD-A27080191-065-03-6	-3.11576	-2.70134
BRD-A27143604-001-01-2	-1.42981	-4.19263
BRD-A27143604-001-02-0	-1.21887	-1.01551
BRD-A27274504-001-01-6	-2.71667	-1.95507
BRD-A27290375-330-01-1	-1.82127	-1.65425
BRD-A27290375-330-02-9	-2.28076	-1.82345
BRD-A27370296-001-03-0	-0.243433	-0.0722452
BRD-A27376179-001-01-3	-0.537336	-0.44628
BRD-A27554692-001-01-3	-3.26375	-6.95534
BRD-A27732521-003-08-3	-1.18648	0.820914
BRD-A27883417-300-01-6	-5.88398	-5.78956
BRD-A27887842-001-03-2	-1.49112	-4.37609
BRD-A27887842-001-04-0	0.0272474	0.117974
BRD-A27911617-001-01-7	-1.36194	-0.724778
BRD-A27914728-001-03-3	-1.06896	-0.321186
BRD-A27924917-001-01-7	-1.97609	-4.64589
BRD-A27924917-001-03-3	-0.04504	0.678618
BRD-A28044053-001-01-7	-2.36298	-2.04376
BRD-A28095882-001-05-7	-2.57351	-2.50525
BRD-A28301258-001-03-0	-4.12376	-3.76717
BRD-A28301258-001-04-8	-6.38543	-5.6351
BRD-A28318179-003-03-6	-1.41308	-0.987453
BRD-A28318179-003-08-5	0.583882	1.21679
BRD-A28329383-001-02-1	2.14253	2.6038
BRD-A28422058-001-01-0	-2.16004	-5.20706
BRD-A28422330-001-10-1	-3.19853	-1.06965
BRD-A28467416-002-01-0	2.27005	2.89383
BRD-A28545468-003-10-9	-2.28015	-1.8764
BRD-A28545468-003-16-6	-1.08642	-0.598045
BRD-A28702443-005-01-0	-1.43787	-0.78775
BRD-A28746609-001-05-7	-3.83233	-9.86913
BRD-A28856712-003-15-3	-3.51838	-4.21683
BRD-A28856712-003-26-0	-4.37698	-4.01383
BRD-A28887267-001-13-6	-1.70234	-1.2036
BRD-A28887267-001-19-3	-0.801284	-0.754673
BRD-A28940325-001-15-8	-2.99131	-2.58301
BRD-A28940325-001-24-0	-2.44318	-1.81126
BRD-A28958257-001-01-2	-0.709131	-0.287634
BRD-A28970875-300-03-1	-6.11312	-8.93319
BRD-A28970875-300-04-9	-6.91445	-6.40335
BRD-A29014990-001-02-3	-4.46268	-2.19137
BRD-A29111201-001-03-0	-2.08236	-1.44364
BRD-A29111201-001-04-8	-1.70576	-0.73537
BRD-A29148886-003-01-4	-6.19844	-3.07634
BRD-A29260609-003-15-3	-0.506701	0.463183
BRD-A29260609-003-26-0	-1.55942	-1.27668
BRD-A29281099-003-03-2	-0.848663	-0.39408
BRD-A29289453-001-03-9	-2.73533	-4.11033
BRD-A29289453-001-04-7	-1.77729	-1.49543
BRD-A29289453-001-05-4	-4.14015	-3.32131
BRD-A29322418-237-03-2	-0.983863	-2.45514
BRD-A29349577-001-15-6	-1.30675	-1.33207
BRD-A29349577-001-23-0	-1.22619	-0.972873
BRD-A29349577-001-24-8	-1.29834	-0.457178
BRD-A29371732-001-03-8	-2.36016	-2.71824
BRD-A29426959-050-07-4	-2.53352	-5.54161
BRD-A29426959-050-13-2	-1.36712	-1.24067
BRD-A29437505-001-01-6	-2.51285	-2.30018
BRD-A29485665-001-03-7	1.50737	1.11316
BRD-A29485665-001-14-4	-3.71776	-2.12771
BRD-A29520968-001-03-5	-4.53205	-2.76821
BRD-A29578214-001-08-4	-2.0268	-1.90683
BRD-A29623586-001-01-3	-2.75968	-0.600145
BRD-A29644307-050-10-5	-2.10533	-3.77562
BRD-A29644307-050-17-0	-1.75229	-1.62309
BRD-A29700858-304-01-8	-1.6692	-0.515879
BRD-A29700858-304-02-6	-1.64875	-0.922243
BRD-A29731977-001-04-5	-3.91531	-3.12132
BRD-A29734509-011-06-0	-2.50007	-5.5524
BRD-A29734509-011-13-6	-2.10035	-1.64387
BRD-A29844814-300-01-5	-0.99385	-0.256787
BRD-A29854054-236-07-6	-0.840056	-0.537563
BRD-A29854054-236-12-6	-1.92787	-0.837096
BRD-A29944538-003-08-3	-2.95324	-2.66239
BRD-A30000356-001-01-9	-4.17008	-3.91355
BRD-A30051119-002-01-8	-0.686189	0.0497407
BRD-A30133509-003-03-6	-1.99347	-1.57888
BRD-A30205217-001-11-2	-0.974822	-0.532871
BRD-A30205217-001-12-0	-1.59819	-1.10611
BRD-A30403214-001-02-5	-1.5138	-1.24511
BRD-A30403214-001-03-3	0.296977	0.37445
BRD-A30403214-001-04-1	-2.80425	-2.75405
BRD-A30582499-003-05-1	-1.61486	-1.51967
BRD-A30590053-003-01-1	-4.30614	-10.0634
BRD-A30590053-003-02-9	-5.6938	-3.37297
BRD-A30655177-001-06-6	-2.07643	-2.92998
BRD-A30655177-001-14-0	-0.261532	0.441521
BRD-A30693873-003-06-0	-3.46023	-3.77309
BRD-A30693873-003-12-8	-3.4386	-2.88856
BRD-A30703952-201-01-2	-5.49584	-2.64516
BRD-A30717181-001-03-5	-2.2655	-3.82633
BRD-A30774155-001-01-2	-0.911396	-0.496373
BRD-A30815329-001-12-1	-3.48901	-1.90225
BRD-A30886737-001-01-1	-2.0757	-2.55596
BRD-A30886737-001-02-9	-3.31862	-1.99295
BRD-A30984645-001-02-3	-2.65395	-2.60757
BRD-A31007383-001-01-0	-1.37238	-2.15606
BRD-A31087826-001-01-7	0.311132	1.08189
BRD-A31095847-001-02-3	-3.54896	-3.39526
BRD-A31159102-003-16-3	-5.6161	-12.5887
BRD-A31159102-003-31-2	-4.66783	-3.60229
BRD-A31195449-004-01-9	-3.45328	-7.31147
BRD-A31204924-001-14-2	-0.0388175	0.982417
BRD-A31362467-065-01-3	-1.49574	-0.826312
BRD-A31454688-001-01-6	-0.68103	-0.528628
BRD-A31521121-001-26-4	0.486334	0.699347
BRD-A31564021-001-01-8	-0.0947006	0.26537
BRD-A31564021-001-02-6	-3.44904	-3.12124
BRD-A31575449-066-07-8	-0.459954	0.074998
BRD-A31575449-300-01-4	-2.22136	-5.59557
BRD-A31576716-003-03-4	-1.69122	-1.5586
BRD-A31800922-003-15-2	-3.22911	-3.57699
BRD-A31800922-003-25-1	-5.26727	-4.26515
BRD-A31801025-001-01-0	-2.36816	-2.45007
BRD-A31811760-001-06-7	1.44237	5.85967
BRD-A31863775-001-03-8	-2.16237	-1.7344
BRD-A31916785-103-01-0	-2.54467	-5.57398
BRD-A31962514-001-03-4	-1.25564	-1.10894
BRD-A31990649-304-02-3	-0.314502	-1.38507
BRD-A31990649-304-03-1	1.21744	3.17864
BRD-A32164164-048-01-4	-2.56696	-4.55955
BRD-A32172948-001-07-6	0.530845	0.582123
BRD-A32269193-001-01-5	-0.00499987	0.0204727
BRD-A32440707-001-01-1	-0.197542	-0.600955
BRD-A32505112-001-03-6	-1.50677	-1.62621
BRD-A32505112-001-04-4	-1.52303	-0.24022
BRD-A32597168-001-03-6	-1.30395	-0.967975
BRD-A32673558-001-01-7	-1.34898	-1.14951
BRD-A32673558-003-03-9	0.272378	1.50646
BRD-A32757659-236-03-4	-1.84235	-2.22463
BRD-A32796301-001-01-6	-2.86621	-2.26761
BRD-A32949107-001-01-7	-3.65331	-4.35824
BRD-A32988684-003-08-7	-1.59318	-0.48891
BRD-A33084557-001-01-7	-4.00027	-4.41884
BRD-A33084557-001-06-6	-2.27801	-1.91212
BRD-A33119430-001-03-0	-0.742272	-0.730275
BRD-A33168282-003-06-5	-0.955992	-2.85444
BRD-A33168282-003-18-0	0.624074	1.39187
BRD-A33280134-001-03-9	-3.26022	-3.45528
BRD-A33295645-001-01-3	0.381969	0.598001
BRD-A33352494-316-01-6	-3.02267	-2.18306
BRD-A33447119-001-03-3	-3.53132	-9.11371
BRD-A33447119-001-10-8	-1.48195	-1.34678
BRD-A33479817-003-03-7	-2.36093	-2.24142
BRD-A33514596-003-01-2	-5.69929	-5.67463
BRD-A33603104-003-01-8	-5.66766	-4.61169
BRD-A33676200-003-01-7	-2.4735	-2.90419
BRD-A33692381-001-01-9	-1.67767	-0.992885
BRD-A33697453-008-02-4	0.896537	1.43168
BRD-A33711280-003-03-1	-7.14372	-6.46016
BRD-A33810106-001-03-7	-1.30898	0.280615
BRD-A34006693-001-07-1	-1.30453	-1.09203
BRD-A34006693-001-15-4	1.63398	2.33821
BRD-A34097118-004-01-4	-1.84699	-2.02115
BRD-A34205397-001-03-7	-6.18431	-8.2232
BRD-A34205397-001-04-5	-4.82343	-4.75265
BRD-A34255068-001-38-6	-3.47047	-2.53002
BRD-A34309505-001-10-1	-0.722271	-0.78775
BRD-A34358106-003-02-4	-8.03764	-6.12048
BRD-A34380114-001-03-0	-3.95138	-4.4425
BRD-A34492468-001-04-3	-1.00007	-0.780988
BRD-A34603619-001-01-9	-2.07715	-0.540816
BRD-A34706053-003-01-9	-2.38301	-5.01281
BRD-A34716233-004-03-5	-1.43572	-0.416171
BRD-A34751532-001-04-4	-2.55581	-5.09914
BRD-A34751532-001-06-9	0.757306	2.8101
BRD-A34774643-003-06-3	-1.50899	-0.980461
BRD-A34842997-001-03-1	-1.38009	-0.466564
BRD-A34891365-001-03-2	-1.4801	-1.32193
BRD-A34907681-001-01-7	-1.6575	-1.6084
BRD-A35054627-001-05-5	0.153293	0.739241
BRD-A35338386-001-04-6	0.599237	-2.21772
BRD-A35379661-001-04-6	-1.98348	-1.90911
BRD-A35425966-001-02-3	-2.97641	-2.75717
BRD-A35430844-001-01-3	1.93838	4.94745
BRD-A35511923-019-01-6	-2.10432	-1.61993
BRD-A35588707-001-05-5	-4.99888	-4.35414
BRD-A35623999-001-04-0	-2.14332	-5.16389
BRD-A35623999-001-05-7	-0.783446	-0.858523
BRD-A35623999-001-06-5	-2.25118	-1.93282
BRD-A35868371-005-01-6	-1.77246	-1.28793
BRD-A35871558-001-01-4	-3.45328	-6.45891
BRD-A35912562-001-01-0	-1.8646	-4.64589
BRD-A35912562-001-02-8	-0.323533	-0.0882004
BRD-A35931254-003-03-5	-3.72692	-3.54318
BRD-A35931254-003-04-3	-0.8636	0.00914761
BRD-A35989968-001-03-4	-3.45431	-3.85676
BRD-A35989968-001-04-2	-1.47157	-1.16126
BRD-A36010170-001-03-2	-0.281502	-1.38675
BRD-A36010170-001-04-0	5.12949	5.61698
BRD-A36057565-001-01-0	1.36782	2.47284
BRD-A36066264-001-03-1	-2.91257	-7.36543
BRD-A36074203-003-03-5	-2.12102	-6.09199
BRD-A36074203-003-07-6	-3.11191	-1.81111
BRD-A36217750-001-09-8	-3.18381	-3.12649
BRD-A36217750-001-16-3	-1.14621	-0.955362
BRD-A36267905-003-12-7	-4.19821	-5.93095
BRD-A36267905-003-18-4	-3.97372	-5.90574
BRD-A36267905-003-19-2	2.00397	2.96162
BRD-A36275421-001-09-5	-5.74888	-5.54823
BRD-A36318220-001-08-8	-3.06623	-0.475736
BRD-A36318220-001-12-0	-3.96424	-1.95007
BRD-A36322567-001-01-6	-1.70011	-1.78512
BRD-A36331462-001-02-1	-7.87213	-5.19424
BRD-A36456202-001-01-3	0.81564	1.17676
BRD-A36603537-001-07-3	-1.11563	-1.26784
BRD-A36636859-001-01-6	-0.642265	-1.10555
BRD-A37011749-001-03-1	-4.06694	-4.51688
BRD-A37288617-003-02-2	-2.86819	0.143087
BRD-A37347161-003-01-8	-1.75112	-2.4443
BRD-A37347161-003-02-6	-4.28094	-2.79191
BRD-A37390343-003-03-5	0.867769	1.35117
BRD-A37441042-003-03-0	-1.56677	-1.18332
BRD-A37441042-003-04-8	-2.7783	-1.88128
BRD-A37492983-001-10-3	-1.89673	-1.16207
BRD-A37541666-003-01-6	-2.50565	-7.61364
BRD-A37704979-001-10-7	-1.68449	-1.4142
BRD-A37704979-001-15-6	-3.93955	-1.81725
BRD-A37704979-003-01-2	-1.52457	-2.42277
BRD-A37752546-001-01-9	-2.34773	-2.18987
BRD-A37776212-003-02-5	-1.09152	-1.61416
BRD-A37780065-001-03-7	-2.22279	-4.09004
BRD-A37828317-001-03-0	-7.14903	-16.0636
BRD-A37959677-001-03-7	-2.32601	-2.30493
BRD-A38076815-003-10-3	-1.86098	-0.0485855
BRD-A38218502-001-01-2	-2.16915	-1.87005
BRD-A38350138-001-03-1	-1.80457	-2.29901
BRD-A38350138-001-04-9	-1.22039	-1.17236
BRD-A38592941-001-02-7	-1.26734	-1.25637
BRD-A38675539-001-05-1	-1.709	-1.25431
BRD-A38706605-001-01-2	0.80834	1.91766
BRD-A38747044-001-01-5	-1.31832	-4.95885
BRD-A38747044-001-02-3	-0.786905	-0.243888
BRD-A38747044-001-03-1	-2.08162	-1.95527
BRD-A38749782-001-03-3	-2.48262	-3.5677
BRD-A38898897-003-01-0	-2.26595	-5.33656
BRD-A39052811-048-11-0	-2.53521	-3.13962
BRD-A39052811-048-12-8	-4.36336	-2.7272
BRD-A39189014-003-14-4	-0.566705	-1.12246
BRD-A39189014-003-22-7	-3.01755	-2.21823
BRD-A39230911-001-10-2	-1.79713	-0.448967
BRD-A39255369-001-03-1	-2.1621	-1.47722
BRD-A39277751-001-01-5	-1.85054	-1.62274
BRD-A39390670-236-04-0	-0.695602	-1.19684
BRD-A39390670-236-10-7	-0.544978	1.05029
BRD-A39415247-001-06-2	-0.888048	-0.717596
BRD-A39522003-001-01-0	-1.64899	-1.15874
BRD-A39660642-001-03-1	-2.12903	-2.1773
BRD-A39747742-001-03-5	0.638257	0.922702
BRD-A39791822-001-04-4	-1.74456	-0.858749
BRD-A39791822-001-05-1	-2.11524	-0.93952
BRD-A39794701-003-01-6	-6.20585	-5.65885
BRD-A39935389-001-05-9	-6.08565	-5.68912
BRD-A39969961-001-01-3	-1.60261	-2.81127
BRD-A40022950-001-03-7	-0.866725	-0.314424
BRD-A40084411-003-07-7	0.943581	1.61234
BRD-A40195998-001-01-9	-1.44899	-0.463183
BRD-A40253167-001-03-7	-1.4601	-1.44364
BRD-A40302156-001-01-9	-1.25637	-1.03018
BRD-A40413915-003-01-2	-4.55541	-4.16239
BRD-A40431293-001-01-0	-6.76447	-9.67867
BRD-A40546373-001-01-8	-1.76572	-1.31859
BRD-A40639672-001-01-9	0.891199	0.944733
BRD-A40639672-234-09-9	1.43538	1.0522
BRD-A40639672-234-18-0	-2.3159	-2.48785
BRD-A40777960-001-02-6	-2.71848	-2.3077
BRD-A40777960-001-04-2	-1.11744	-0.266435
BRD-A40787240-066-03-8	-0.77783	-0.645752
BRD-A40787240-066-04-6	-1.75044	-1.5543
BRD-A40940854-001-01-1	-0.941266	-1.89385
BRD-A40940854-001-02-9	-0.844912	-0.784395
BRD-A41228941-001-01-5	-1.02938	-2.73742
BRD-A41250306-001-11-7	-0.830565	0.0197073
BRD-A41304429-001-14-8	-1.04346	0.652818
BRD-A41304429-001-17-1	-1.65544	-0.929945
BRD-A41385909-001-01-3	-3.34516	-0.99929
BRD-A41385909-001-02-1	-1.47003	-1.36412
BRD-A41450521-075-10-8	-2.21823	-2.0991
BRD-A41451487-001-04-7	-3.76397	-5.4086
BRD-A41451487-001-11-2	-5.3342	-4.46392
BRD-A41451487-001-12-0	-3.52102	-3.029
BRD-A41692738-001-07-6	11.7718	16.1572
BRD-A41714661-001-02-0	1.87046	3.13222
BRD-A41774846-001-01-4	-4.48103	-3.49978
BRD-A41833852-001-01-9	-0.604811	-0.361526
BRD-A41840684-001-01-8	1.23792	2.22981
BRD-A41916216-001-03-9	-2.62462	-2.4951
BRD-A41995253-001-03-7	4.47337	9.26479
BRD-A41995253-001-04-5	-0.259419	1.36059
BRD-A41995253-330-02-2	-0.0606798	0.604689
BRD-A42167015-003-10-2	4.60275	5.97217
BRD-A42270467-001-04-4	-1.83135	-1.39042
BRD-A42423104-001-01-4	-2.04536	-1.49223
BRD-A42553870-001-05-1	-2.30858	-2.80749
BRD-A42553870-001-15-0	-2.51645	-1.56916
BRD-A42571354-300-07-0	-2.14449	-4.12047
BRD-A42571354-300-12-0	-2.26891	-0.752279
BRD-A42628519-001-07-4	-0.197887	-1.51625
BRD-A42628519-001-12-4	-0.107876	0.46238
BRD-A42649439-001-02-8	-5.59381	-12.5887
BRD-A42699921-001-02-8	1.56064	2.26785
BRD-A42699921-001-03-6	1.35564	1.58014
BRD-A42699921-001-04-4	-3.63298	-3.56278
BRD-A42746051-001-01-1	-1.12008	-0.889177
BRD-A42746051-001-02-9	1.76435	3.60354
BRD-A42759514-001-09-8	-2.4945	-5.75744
BRD-A42759514-001-20-5	-1.58698	-0.0798309
BRD-A42759514-001-21-3	-3.41734	-3.32978
BRD-A42881122-001-01-1	-5.98856	-5.53764
BRD-A42929532-001-03-8	-0.402249	-0.682942
BRD-A43005764-003-01-5	-6.73861	-5.98395
BRD-A43076080-001-03-3	-4.77675	-5.57463
BRD-A43082461-001-06-3	0.278008	0.796479
BRD-A43082555-001-01-1	-0.479049	-0.649708
BRD-A43082555-001-02-9	0.952771	2.96238
BRD-A43435802-001-01-2	-2.27208	-0.990592
BRD-A43435802-001-02-0	2.01168	-0.28218
BRD-A43598550-001-09-4	0.415715	1.46756
BRD-A43671941-003-11-9	-0.775639	-0.654175
BRD-A43809092-003-02-1	-0.783595	0.114439
BRD-A43882281-001-11-4	-2.77092	-3.19242
BRD-A43882281-001-15-5	0.876506	1.1877
BRD-A43885598-001-08-1	-1.92386	-2.48467
BRD-A43885598-001-09-9	-0.11174	0.0465574
BRD-A43930669-003-01-0	-2.92372	-7.64602
BRD-A43930669-003-02-8	-5.17291	-3.03032
BRD-A43930669-003-03-6	-3.25722	-2.84653
BRD-A43940795-001-03-6	-2.61072	-3.13032
BRD-A43974499-066-01-1	-3.99398	-9.64251
BRD-A43974499-066-02-9	-0.383172	0.221378
BRD-A43974575-065-04-4	-3.37245	-4.18133
BRD-A43974575-065-05-1	-1.47642	-0.779065
BRD-A43999749-004-03-3	-1.31787	-1.44026
BRD-A43999749-004-04-1	-1.51534	-0.790671
BRD-A44008656-036-15-9	-2.62271	-5.26102
BRD-A44008656-036-25-8	-2.12384	-1.8351
BRD-A44090213-001-15-7	-3.93126	-5.07896
BRD-A44090213-001-25-6	-2.9779	-2.48428
BRD-A44133049-003-07-8	-0.692254	-0.459954
BRD-A44181516-001-01-8	-0.315826	0.616802
BRD-A44448661-001-04-8	4.91889	6.24283
BRD-A44500574-001-01-8	-10.7056	-6.63542
BRD-A44500574-001-03-4	-7.37109	-2.9329
BRD-A44511856-001-01-4	-1.37174	-0.5286
BRD-A44696962-001-01-4	-2.19123	-1.23731
BRD-A44701612-066-01-9	-5.47675	-11.0778
BRD-A44780397-001-01-1	-2.8847	-4.7646
BRD-A44863528-001-08-2	-0.12223	0.56461
BRD-A44863528-001-13-2	-1.2507	-0.906733
BRD-A44936478-001-01-1	-1.78824	-1.74596
BRD-A44966919-001-09-8	-1.03563	-0.703227
BRD-A44971162-001-01-9	-1.43391	-0.474078
BRD-A45044890-236-01-5	-1.82457	-0.963557
BRD-A45044890-236-02-3	0.340098	0.913244
BRD-A45086179-001-01-6	0.106864	0.0742261
BRD-A45107007-001-03-4	-0.0633125	-2.03593
BRD-A45107007-001-06-7	-2.83379	-0.647564
BRD-A45153512-001-01-0	-2.19142	-1.97681
BRD-A45498368-001-07-1	-2.83229	-2.62101
BRD-A45499626-001-02-8	-2.36629	-4.31134
BRD-A45538101-001-01-9	4.17664	4.89195
BRD-A45543382-001-10-0	-0.684818	0.0300719
BRD-A45869167-001-10-0	-1.86002	-1.80107
BRD-A45869167-001-12-6	-6.91595	-3.87842
BRD-A45889380-300-04-8	-4.20581	-10.1605
BRD-A45889380-300-07-1	-6.18848	-5.51587
BRD-A45906415-001-01-9	-0.512364	0.234994
BRD-A46066006-004-15-0	-2.48239	0.737036
BRD-A46066006-004-22-6	-1.87338	-1.02279
BRD-A46136514-001-01-2	-2.70569	-1.78776
BRD-A46179541-311-02-0	-1.04042	-0.235328
BRD-A46186775-369-01-2	-3.24787	-3.91762
BRD-A46186775-369-02-0	-1.55871	-3.98693
BRD-A46335897-003-27-8	-5.8525	-5.22375
BRD-A46393198-003-10-9	-2.645	-6.17833
BRD-A46393198-003-16-6	0.523924	0.892225
BRD-A46460777-001-03-4	-2.97576	-3.3809
BRD-A46600320-001-01-1	-1.27564	-0.950033
BRD-A46641338-323-01-3	-4.09416	-3.95197
BRD-A46684810-001-04-6	-5.6321	-6.84866
BRD-A46717658-236-02-5	-2.48929	-1.5203
BRD-A46747628-001-01-9	-1.45754	-1.47323
BRD-A46778020-001-03-4	-0.922284	-0.56461
BRD-A46813902-001-01-6	-2.75924	-2.45796
BRD-A46876182-003-01-0	-2.38238	-2.59991
BRD-A46876182-003-02-8	-3.77413	-3.57222
BRD-A47342814-003-02-6	-3.14124	-3.14044
BRD-A47364545-003-02-6	1.96838	2.41675
BRD-A47449001-004-12-9	-2.14436	-1.9491
BRD-A47449001-004-13-7	-2.63103	-1.8474
BRD-A47449001-004-14-5	1.89677	2.09941
BRD-A47494775-003-11-3	-4.59752	-3.78145
BRD-A47598013-004-06-1	-2.96313	-3.66912
BRD-A47598013-004-16-0	-3.22544	-2.28969
BRD-A47598013-004-18-6	-3.16034	-3.06344
BRD-A47633927-001-01-8	-2.07879	-2.02923
BRD-A47706533-001-02-6	1.54191	3.66966
BRD-A47790386-001-03-6	1.16358	1.2708
BRD-A47884604-051-01-2	0.807657	1.70323
BRD-A47940219-001-01-4	-2.93169	-2.54737
BRD-A47953250-001-01-7	-0.607796	-0.484312
BRD-A48015106-004-03-0	-3.59821	-6.99851
BRD-A48015106-004-08-9	0.364103	0.750622
BRD-A48180038-003-15-1	-2.75352	-3.16452
BRD-A48180038-003-24-3	-4.1985	-3.92544
BRD-A48237631-001-03-0	-5.6077	-7.33571
BRD-A48237631-001-04-8	-3.2011	-3.0274
BRD-A48257147-001-01-9	-0.53792	-0.588155
BRD-A48261811-001-07-3	-3.64479	-3.54456
BRD-A48261811-001-08-1	-0.273275	-0.0388082
BRD-A48300215-001-02-2	-3.65005	-3.18189
BRD-A48300215-001-03-0	-0.953397	-1.44026
BRD-A48300215-001-04-8	-3.50029	-2.99426
BRD-A48323445-001-03-4	-2.02236	-1.95416
BRD-A48376327-003-01-5	-3.17385	-2.45197
BRD-A48397526-001-03-0	-2.89575	-3.12733
BRD-A48420483-001-02-3	-1.81111	-0.00145077
BRD-A48430263-003-06-5	-3.72642	-8.4554
BRD-A48430263-003-17-2	-2.4126	-0.611954
BRD-A48430263-003-19-8	-2.81418	-2.65408
BRD-A48570745-001-01-1	-5.45465	-5.76359
BRD-A48720949-001-03-2	-2.43279	-2.4875
BRD-A48720949-001-04-0	-0.813535	0.426073
BRD-A49035384-003-12-3	-1.78656	-2.55227
BRD-A49035384-003-28-9	0.472474	1.23924
BRD-A49035384-003-29-7	-1.75216	-1.49185
BRD-A49035384-003-30-5	-3.14762	-2.49216
BRD-A49046702-003-03-4	-3.22473	-7.2683
BRD-A49046702-003-08-3	-1.30401	-1.63218
BRD-A49046702-003-09-1	-2.90682	-2.84568
BRD-A49148672-004-01-6	-2.29382	-3.80412
BRD-A49160188-003-04-4	-2.21021	-7.50572
BRD-A49160188-003-12-7	-2.16777	-2.00666
BRD-A49172652-001-13-1	-1.93149	-5.96249
BRD-A49172652-001-27-1	0.914729	1.25277
BRD-A49225603-045-05-0	-6.22776	-6.12475
BRD-A49225603-045-10-0	-5.17612	-6.65128
BRD-A49243397-001-03-1	-1.57788	-1.29827
BRD-A49358627-001-14-6	0.118298	0.521331
BRD-A49370193-051-01-7	-6.23485	-13.6139
BRD-A49399758-015-01-8	-0.954933	-0.233574
BRD-A49447682-001-01-6	-0.432008	-1.00904
BRD-A49447682-001-02-4	0.543689	0.638404
BRD-A49544621-003-01-0	-3.57034	-6.57762
BRD-A49544621-003-02-8	-5.09614	-4.83887
BRD-A49544621-003-03-6	-5.77259	-3.85198
BRD-A49622760-001-01-9	-2.66756	-0.540816
BRD-A49765801-001-03-3	-1.59146	-4.18184
BRD-A49765801-001-04-1	0.0672205	0.43872
BRD-A49838158-001-01-1	-0.903106	-0.424094
BRD-A49906757-004-09-8	0.570925	0.86538
BRD-A49912425-001-01-1	-1.07863	-2.49831
BRD-A50016482-001-01-7	0.224085	0.496532
BRD-A50028488-001-01-6	-0.77134	1.83408
BRD-A50028488-001-02-4	-1.61895	0.08467
BRD-A50049929-001-01-9	-0.979086	-0.605643
BRD-A50062753-001-01-3	-2.60644	-0.993793
BRD-A50064262-001-03-9	0.937841	1.81892
BRD-A50064262-001-04-7	4.30045	4.52589
BRD-A50157456-065-12-3	-1.04451	-1.1326
BRD-A50157456-065-20-6	-1.91609	-3.08201
BRD-A50157456-065-21-4	-1.58459	-1.10623
BRD-A50311610-300-06-2	-5.11295	-6.54458
BRD-A50311610-300-10-4	-8.57587	-6.58651
BRD-A50311610-300-11-2	-5.42079	-3.82011
BRD-A50675490-001-01-0	-1.93688	-1.61587
BRD-A50675702-001-04-8	-1.24028	-5.53082
BRD-A50675702-001-07-1	0.00884554	1.0213
BRD-A50684349-003-01-1	-1.20126	-4.50559
BRD-A50684349-003-02-9	3.27016	3.53441
BRD-A50737080-001-03-0	-5.26047	-2.97558
BRD-A50737080-001-06-3	-5.91131	-5.09847
BRD-A50764878-003-01-0	-3.19686	-6.83663
BRD-A50764878-003-02-8	-1.63045	-1.09224
BRD-A50922295-001-01-3	3.12677	3.33602
BRD-A50928468-001-03-7	-2.72465	-2.76135
BRD-A50998626-001-02-1	-0.580939	0.61983
BRD-A51078674-003-01-0	-5.16651	-4.48368
BRD-A51355958-003-01-9	-2.02093	-1.61653
BRD-A51381734-034-01-1	-2.84568	-5.35815
BRD-A51382177-236-03-0	-0.290658	-0.301402
BRD-A51382177-236-04-8	-0.9067	-0.77585
BRD-A51393488-003-01-9	-1.71967	-4.3653
BRD-A51407134-001-01-9	-1.69391	-1.40958
BRD-A51407134-001-02-7	-2.02166	-1.68931
BRD-A51410489-003-02-8	-2.59483	-5.46606
BRD-A51571244-001-01-9	-4.08778	-3.17351
BRD-A51713165-003-01-8	-5.0754	-10.3871
BRD-A51713165-003-02-6	-5.45609	-5.3839
BRD-A51714012-003-01-1	-2.4405	-2.72102
BRD-A51714012-003-13-6	-1.05833	-3.67328
BRD-A51714012-003-14-4	-3.15994	-2.9332
BRD-A51747092-003-03-0	-2.91515	-2.78283
BRD-A51820102-008-16-4	-6.01745	-12.4052
BRD-A51820102-008-28-9	-4.91935	-4.78915
BRD-A51829654-003-02-8	-3.02963	-5.6819
BRD-A51829654-003-07-7	-2.84755	-2.29324
BRD-A51831848-001-01-7	-0.691432	0.0822705
BRD-A51929314-001-01-4	-0.660554	-0.253608
BRD-A51964809-003-12-6	-5.61326	-4.82133
BRD-A52460047-001-01-3	-0.868111	-0.628892
BRD-A52530684-003-01-7	-5.58954	-6.73913
BRD-A52588987-004-04-1	-0.482177	-0.404694
BRD-A52588987-004-08-2	-1.29961	0.498477
BRD-A52588987-004-09-0	-3.26481	-2.9639
BRD-A52660433-066-01-3	-5.62358	-6.83714
BRD-A52660433-066-02-1	-5.20511	-7.95138
BRD-A52660433-066-03-9	-5.46455	-5.25433
BRD-A52893269-001-03-2	-2.16237	-1.76821
BRD-A52922642-001-03-7	-4.99608	-4.78897
BRD-A53037217-001-02-0	1.11612	1.76407
BRD-A53037300-001-01-0	1.21315	1.65829
BRD-A53077924-001-01-2	-2.17675	-1.87644
BRD-A53077924-236-01-4	-1.5043	-2.83632
BRD-A53131506-001-01-3	-0.944843	-2.40118
BRD-A53134341-001-03-2	-6.60801	-4.03544
BRD-A53134341-001-04-0	-3.56924	-0.96723
BRD-A53151380-001-01-2	0.681185	1.51979
BRD-A53176877-001-03-5	-0.686713	-0.199473
BRD-A53271750-001-01-0	-0.838443	-2.32125
BRD-A53472930-001-01-7	-2.36715	-1.19766
BRD-A53484347-003-03-1	-1.43787	-1.34898
BRD-A53539450-004-01-7	-2.61875	-2.27513
BRD-A53561827-004-15-7	-1.32676	-0.642371
BRD-A53561827-004-23-1	-2.00932	-1.48421
BRD-A53566267-001-01-9	-2.84849	-1.13374
BRD-A53576514-048-06-9	-3.87075	-5.48974
BRD-A53576514-048-14-3	-4.64692	-4.39495
BRD-A53597562-003-01-2	-3.77346	-3.43007
BRD-A53813595-001-01-8	-1.72339	-1.01196
BRD-A53813595-001-02-6	-1.28914	-1.03503
BRD-A53951045-004-01-6	2.91448	3.21806
BRD-A53952395-003-15-2	-1.89124	-1.62959
BRD-A53952395-003-25-1	-1.93272	-0.828378
BRD-A54139254-001-09-2	-1.76111	-1.67146
BRD-A54228901-001-01-7	-1.73131	-0.81733
BRD-A54236247-003-03-5	-2.73533	-3.28877
BRD-A54236247-003-04-3	-2.45408	-1.63545
BRD-A54275602-001-01-0	-0.77955	-0.389091
BRD-A54487287-001-03-9	-2.98504	-6.76109
BRD-A54490543-066-04-4	-4.42878	-7.06326
BRD-A54490543-066-11-9	-2.22006	-1.57223
BRD-A54596827-036-01-4	-3.92414	-5.53538
BRD-A54845972-066-01-5	-3.0798	-5.75744
BRD-A54880345-001-11-8	-2.907	-5.87615
BRD-A54927599-001-16-9	-4.4065	-2.85604
BRD-A55204514-003-01-2	-4.96715	-4.84133
BRD-A55272860-001-08-8	-1.41121	-1.15627
BRD-A55272860-001-14-6	-1.13282	-1.81289
BRD-A55272860-001-15-3	-0.474979	-0.581625
BRD-A55272860-001-16-1	-2.97662	-2.72596
BRD-A55312468-001-03-9	-2.89716	-2.26475
BRD-A55369275-001-01-6	-2.53918	-2.3302
BRD-A55369275-003-01-2	-1.21798	-3.75016
BRD-A55393291-001-05-7	-0.813303	-1.44787
BRD-A55393291-001-09-9	-1.68462	-1.172
BRD-A55416093-001-03-1	2.45548	2.09901
BRD-A55416093-001-06-4	1.49116	3.49702
BRD-A55424491-001-08-2	-3.23851	-3.01233
BRD-A55424491-001-19-9	-4.61405	-6.7569
BRD-A55455283-001-01-3	-1.08156	-0.63587
BRD-A55455283-001-02-1	-2.38006	-2.33696
BRD-A55464252-001-01-2	1.87479	2.99823
BRD-A55469827-001-07-4	0.183848	0.649729
BRD-A55484088-050-01-7	-5.68742	-7.09079
BRD-A55484088-050-02-5	-6.18449	-5.02843
BRD-A55484088-050-03-3	-4.59115	-4.5891
BRD-A55484088-050-04-1	-5.69816	-5.55271
BRD-A55579717-001-03-2	-1.59566	-1.64988
BRD-A55594068-065-03-1	-7.10444	-15.5888
BRD-A55664972-236-02-6	-1.51359	-0.782056
BRD-A55748233-001-08-7	0.549703	1.00845
BRD-A55756846-300-01-0	0.671703	0.55578
BRD-A55913614-316-06-2	-5.6384	-12.0923
BRD-A55913614-316-09-6	-6.23956	-5.55662
BRD-A55962179-001-08-0	-0.193983	-2.60921
BRD-A55962179-001-22-1	-0.77955	-0.216162
BRD-A56085258-001-01-8	-3.06131	-2.7297
BRD-A56152450-001-02-0	-1.64269	-0.0112
BRD-A56152450-001-03-8	-2.78785	-1.80662
BRD-A56241705-003-01-2	-0.288764	-0.25061
BRD-A56359832-001-04-6	-1.3312	-1.60593
BRD-A56359832-001-11-1	2.72328	2.83807
BRD-A56359832-001-13-7	-3.72394	-3.46439
BRD-A56371469-001-03-3	-2.45715	-2.35283
BRD-A56432867-001-01-5	3.80519	-0.329132
BRD-A56592690-001-04-3	-1.85258	0.0596463
BRD-A56613951-004-01-1	-1.40644	-0.569193
BRD-A56675431-001-07-3	-1.36292	-3.62066
BRD-A56675431-001-12-3	-3.00951	-2.6321
BRD-A56690687-001-01-6	-1.66832	-0.271276
BRD-A56858165-001-04-4	-1.9885	-0.644749
BRD-A56884981-001-02-6	-0.784497	-0.993985
BRD-A56892734-001-09-4	2.21544	2.33946
BRD-A56987319-001-05-3	-1.16224	-5.16389
BRD-A56987319-001-12-9	-1.53089	-0.436075
BRD-A56987319-001-13-7	-2.97285	-1.32663
BRD-A57089740-001-03-1	-0.102229	-0.192711
BRD-A57133233-003-06-0	-3.58246	-3.85761
BRD-A57133233-003-11-0	-1.433	-0.793015
BRD-A57133765-300-01-7	-4.13976	-3.49434
BRD-A57382968-001-18-3	-0.961566	-3.24295
BRD-A57382968-001-29-0	0.0713477	0.222265
BRD-A57592049-001-01-6	-0.518226	-0.443993
BRD-A57798112-001-03-7	-0.130321	0.392717
BRD-A57798559-004-02-3	1.11547	2.76082
BRD-A57798559-005-01-2	-6.08992	-8.3259
BRD-A57806482-001-01-4	0.896794	1.0119
BRD-A57833392-001-01-7	-2.22614	-0.405722
BRD-A57886255-001-01-1	-3.78729	-1.04545
BRD-A57886255-001-02-9	-1.40785	-1.1802
BRD-A57900429-003-05-8	-3.71506	-3.6259
BRD-A57957888-001-08-0	-0.503492	-0.303211
BRD-A58048407-001-09-7	-1.69737	-5.12073
BRD-A58048407-001-18-8	-1.30883	-1.06535
BRD-A58193911-003-12-0	-2.03347	-2.36325
BRD-A58193911-003-18-7	-5.16148	-3.31257
BRD-A58207013-001-01-2	-1.34062	-1.91555
BRD-A58564983-001-03-8	-7.21035	-16.0852
BRD-A58564983-001-04-6	-0.544978	-0.506073
BRD-A58587171-001-04-9	-1.20453	-1.83583
BRD-A58955223-001-03-8	-0.576843	0.488609
BRD-A59001851-001-02-1	-1.08725	-0.604972
BRD-A59014912-001-01-3	-0.110553	0.384081
BRD-A59046243-001-01-5	2.10026	2.15621
BRD-A59174698-003-12-8	-3.51838	-4.73411
BRD-A59174698-003-18-5	0.394389	1.29025
BRD-A59198242-003-02-9	2.3686	5.03563
BRD-A59303141-001-10-4	2.27799	6.03473
BRD-A59337442-051-05-3	-0.663148	0.781371
BRD-A59378440-001-01-3	-1.4262	-1.32004
BRD-A59391172-001-07-7	-3.89654	-1.01893
BRD-A59391763-103-01-9	-2.37186	-6.53446
BRD-A59413292-001-04-1	-0.402249	-0.645752
BRD-A59413292-001-08-2	-2.903	-1.204
BRD-A59471422-001-02-6	-1.689	-1.86964
BRD-A59539786-001-03-8	-1.78012	-1.95416
BRD-A59552297-001-03-3	-1.09563	-1.24417
BRD-A59682351-001-03-1	-1.43787	-1.18332
BRD-A59709458-001-01-8	-1.4441	-1.32129
BRD-A59709458-001-02-6	-3.41435	-3.15175
BRD-A59747053-003-01-3	-2.12442	-1.00831
BRD-A59825838-326-01-4	-2.53002	-2.19845
BRD-A60153876-001-01-0	-1.02613	-0.97118
BRD-A60197193-001-05-4	-1.12982	-0.905084
BRD-A60197193-001-14-6	-1.02732	-0.508414
BRD-A60217728-001-11-2	-1.20881	-0.740312
BRD-A60498477-001-01-2	0.695874	2.1669
BRD-A60571864-001-03-3	-0.409711	-1.21408
BRD-A60594020-034-01-1	-4.03354	-3.82934
BRD-A60717068-001-01-0	-1.3312	-1.22389
BRD-A60786380-412-01-5	-2.60179	-0.536356
BRD-A60877539-001-01-3	-1.14552	-2.2501
BRD-A61154809-001-08-4	-1.73567	-1.2746
BRD-A61154809-001-15-9	-1.11362	-0.912331
BRD-A61194565-003-27-0	-2.12928	-1.1147
BRD-A61221616-001-04-3	-0.869608	-0.00347776
BRD-A61392169-001-01-9	-1.03403	-2.7789
BRD-A61392169-001-02-7	-2.53889	-2.25585
BRD-A61676498-001-06-6	-1.70033	-1.53587
BRD-A61793559-001-08-1	-3.15889	-4.34868
BRD-A61793559-001-15-6	1.27114	3.73574
BRD-A61850409-001-10-7	-1.39405	-1.19806
BRD-A62021152-003-01-8	-1.6695	-4.52717
BRD-A62021152-003-04-2	-3.38982	-3.14037
BRD-A62035778-004-02-8	-2.61713	-6.05962
BRD-A62057054-001-01-5	-1.83673	-2.61702
BRD-A62057054-001-03-1	-0.354924	-0.140992
BRD-A62057054-001-04-9	-3.81493	-3.27592
BRD-A62071884-001-04-6	-1.99174	-0.185761
BRD-A62071884-001-06-1	-2.27327	-1.79148
BRD-A62129005-001-03-8	-1.47343	-1.27122
BRD-A62182663-001-04-8	-4.6514	-2.96593
BRD-A62184259-001-02-8	2.97389	2.91919
BRD-A62197763-001-01-1	-2.24684	-1.77713
BRD-A62209527-001-03-7	-2.78993	-7.54889
BRD-A62209527-001-04-5	-2.94549	-1.68604
BRD-A62421304-004-18-9	-0.247515	-0.230695
BRD-A62428732-300-06-3	-3.34252	-3.32837
BRD-A62505706-001-03-1	-0.751162	-0.777607
BRD-A62525898-001-04-5	-2.24365	-5.13152
BRD-A62731508-001-04-1	-2.18904	-1.70735
BRD-A62731508-001-05-8	-0.400624	-0.322344
BRD-A62743154-003-01-5	-2.92425	-2.91059
BRD-A62879835-001-03-4	-1.10674	-1.00075
BRD-A63043573-001-01-6	-0.688425	-2.99473
BRD-A63267145-001-01-0	-2.99159	-2.29263
BRD-A63310107-001-04-8	3.27927	7.08993
BRD-A63344375-001-01-8	-4.36336	-2.3187
BRD-A63346720-300-01-1	-6.87032	-15.0492
BRD-A63431791-001-01-9	2.86965	4.45819
BRD-A63433173-001-01-3	-1.75123	-1.48422
BRD-A63444178-001-01-5	-0.495498	-0.489973
BRD-A63546914-003-01-2	-3.92709	-8.12086
BRD-A63546914-003-02-0	-2.73763	-6.03855
BRD-A63546914-003-03-8	-6.22313	-4.32481
BRD-A63667919-103-01-9	-1.95936	-4.53797
BRD-A63675168-001-01-6	-1.77835	-1.32085
BRD-A63752151-001-01-2	-1.781	-0.956092
BRD-A63780829-001-11-4	-1.3215	-0.807916
BRD-A63836183-362-01-1	-1.99281	-4.0955
BRD-A64004759-003-01-9	-6.05184	-3.19405
BRD-A64011898-001-01-0	6.97796	8.09157
BRD-A64064900-001-02-3	-4.6106	-3.58229
BRD-A64068566-001-01-1	-0.0533369	-0.135236
BRD-A64092382-003-09-2	-3.0352	-3.02711
BRD-A64092382-003-18-3	-2.87989	-2.96395
BRD-A64092382-003-19-1	-5.11	-3.9991
BRD-A64125466-236-03-8	-2.33284	-3.48037
BRD-A64125466-236-04-6	1.52417	2.52983
BRD-A64227845-004-02-8	-2.26038	-6.19991
BRD-A64227845-004-09-3	-2.57233	-2.3196
BRD-A64228451-001-04-3	-1.86176	-2.0177
BRD-A64242993-001-03-1	-0.095562	-0.317805
BRD-A64242993-001-05-6	-0.77585	-0.702075
BRD-A64243931-001-01-8	-1.50455	-1.07513
BRD-A64290322-001-01-6	-4.56482	-7.25457
BRD-A64319165-001-07-0	-4.67252	-4.05471
BRD-A64406146-001-01-2	-2.75963	-2.00249
BRD-A64523751-001-03-6	-2.37127	-3.12733
BRD-A64553394-001-04-4	-2.86605	-2.84622
BRD-A64610707-001-04-4	-0.983211	-1.18096
BRD-A64610707-001-05-1	-1.37133	-0.561429
BRD-A64698388-003-01-7	-2.93106	-2.54376
BRD-A64743628-001-01-5	-0.519466	-0.308717
BRD-A64808605-003-02-7	-3.74547	-2.42173
BRD-A64933752-001-01-0	1.15109	1.89397
BRD-A64977602-001-04-3	-1.59146	-3.09186
BRD-A64977602-001-15-9	-2.7239	-2.23252
BRD-A64977602-001-16-7	-3.64824	-1.74043
BRD-A65013509-003-13-7	-2.05125	-2.2483
BRD-A65013509-003-24-4	-3.05388	-2.67508
BRD-A65051990-001-12-9	-0.395113	1.03684
BRD-A65076780-001-02-1	-3.7214	-4.12765
BRD-A65145453-001-02-0	-1.89805	-4.38688
BRD-A65145453-001-06-1	-1.8021	-1.39633
BRD-A65145453-001-07-9	-0.622335	-0.421346
BRD-A65243462-003-03-6	-2.01791	-1.53493
BRD-A65248799-001-01-7	-1.94343	-1.56829
BRD-A65280694-003-13-7	-2.03266	-1.54292
BRD-A65440446-001-03-3	-2.75669	-3.25327
BRD-A65440446-001-04-1	-1.75447	-1.64863
BRD-A65449987-001-06-2	-1.07863	-1.47309
BRD-A65449987-001-10-4	-0.413305	0.382887
BRD-A65550283-001-01-9	0.389374	1.19333
BRD-A65562236-001-01-2	-3.83109	-2.72985
BRD-A65597028-003-02-4	-2.44433	-6.02724
BRD-A65597028-003-08-1	-2.90554	-1.76887
BRD-A65615053-003-01-4	-1.45768	-4.3653
BRD-A65615053-003-03-0	-5.40453	-4.28571
BRD-A65671304-001-03-4	-2.18518	-1.77558
BRD-A65671304-001-07-5	-0.706616	0.113348
BRD-A65683612-001-07-7	-2.60701	-1.60396
BRD-A65767837-001-03-6	-2.85279	-4.22697
BRD-A65767837-001-04-4	0.715608	1.31156
BRD-A65793993-001-01-6	-1.18266	-1.0386
BRD-A65797496-048-09-3	-8.25742	-7.35023
BRD-A65818372-001-05-3	-1.773	-1.73433
BRD-A66116161-001-02-3	-5.55832	-3.67286
BRD-A66143912-001-01-1	-2.59045	-1.15222
BRD-A66369147-300-01-5	-2.18234	-3.00553
BRD-A66435872-313-01-8	-4.66766	-4.26709
BRD-A66435872-332-01-8	-4.52833	-1.06415
BRD-A66435872-332-02-6	-3.81367	-3.02833
BRD-A66443329-001-05-3	-0.47781	-0.652514
BRD-A66481418-236-03-2	-0.857835	-1.09203
BRD-A66491790-001-01-1	-0.775608	-0.946652
BRD-A66521565-001-01-8	-2.82386	-0.573291
BRD-A66559694-001-03-8	-2.12102	-3.34007
BRD-A66563878-003-01-8	-1.53014	-2.36881
BRD-A66861218-001-03-5	-2.75091	-5.25023
BRD-A66869276-001-01-1	-1.729	-1.46055
BRD-A66869276-001-02-9	0.0634083	0.883575
BRD-A66914119-001-04-0	-3.74692	-4.00299
BRD-A66920069-001-01-3	1.30889	1.37086
BRD-A66927094-001-01-7	-3.60936	-8.34748
BRD-A66966115-001-01-0	-1.95303	-0.935516
BRD-A67006024-001-04-8	0.657925	1.02594
BRD-A67006024-001-05-5	-3.14673	-2.24131
BRD-A67060370-001-02-9	-1.53086	-1.41941
BRD-A67097164-001-18-7	-0.560456	-0.132167
BRD-A67101513-001-03-7	-3.00961	-2.71953
BRD-A67138712-001-03-8	-0.851168	-0.209616
BRD-A67181951-001-01-2	1.27497	1.68886
BRD-A67182178-001-01-7	0.782132	1.40768
BRD-A67259561-001-02-6	-0.980066	-0.720132
BRD-A67265925-236-02-6	-4.78081	-3.93494
BRD-A67363467-001-01-3	-2.35988	-2.04785
BRD-A67433117-001-01-8	-3.43296	-3.26849
BRD-A67482312-001-01-8	-3.61493	-6.80425
BRD-A67482312-001-02-6	-1.88684	-0.606594
BRD-A67482312-001-03-4	-3.08512	-2.32654
BRD-A67508925-001-03-5	-1.49121	-1.08865
BRD-A67514145-003-05-8	-0.752372	-1.44487
BRD-A67514145-003-06-6	-0.0708433	0.168865
BRD-A67516570-001-02-8	-2.03192	-1.81491
BRD-A67521319-001-01-6	-1.19659	-0.861324
BRD-A67531813-001-01-6	1.50405	1.92034
BRD-A67616246-001-07-9	-5.18054	-4.74821
BRD-A67709388-001-05-4	-5.86759	-5.7771
BRD-A67748489-001-10-0	0.828607	1.09269
BRD-A67862938-034-09-9	-3.70969	-8.03452
BRD-A67862938-034-14-9	-2.94743	-2.39325
BRD-A67949680-103-01-4	-1.46232	-1.42674
BRD-A67975844-001-01-8	-0.349587	-0.299268
BRD-A67975844-001-02-6	-3.3602	-1.61841
BRD-A67976398-001-01-6	-1.00794	-0.690973
BRD-A68009927-003-02-9	-6.94278	-15.7939
BRD-A68083442-001-01-6	0.53273	1.50728
BRD-A68281735-001-18-6	-2.22089	-2.07031
BRD-A68304895-003-02-2	-1.60885	-4.5686
BRD-A68304895-003-03-0	-5.80344	-4.08574
BRD-A68464583-001-02-5	-4.53385	-2.78818
BRD-A68493689-001-01-9	-0.845718	-0.0471297
BRD-A68509429-003-03-9	-4.18177	-3.33415
BRD-A68589262-001-04-3	-2.33059	-1.70777
BRD-A68589262-001-05-0	-4.23938	-3.13073
BRD-A68631409-001-05-4	-1.52035	-2.77275
BRD-A68631409-001-06-2	-1.91326	-1.36272
BRD-A68723818-050-18-4	-5.75546	-12.1462
BRD-A68723818-050-32-5	-4.08094	-2.39361
BRD-A68888262-003-07-8	-2.4935	-2.48834
BRD-A68888262-003-15-1	-4.2907	-3.63889
BRD-A68929948-001-01-9	-2.78993	-5.56319
BRD-A68930007-001-03-1	-0.521197	-1.75367
BRD-A68942014-003-01-7	-3.91491	-3.11955
BRD-A68969091-001-06-9	-5.38598	-5.38244
BRD-A68969091-001-12-7	-9.15484	-8.21994
BRD-A69126730-001-01-3	-0.561155	0.0991801
BRD-A69143712-001-03-6	-3.82248	-4.15851
BRD-A69275535-001-01-5	0.452857	0.704072
BRD-A69512159-001-03-2	-2.04014	-2.09616
BRD-A69636825-003-03-9	-3.09652	-7.57047
BRD-A69636825-003-04-7	-1.47759	-0.863159
BRD-A69651145-003-04-9	-1.11119	-1.08865
BRD-A69651145-003-07-2	0.146435	0.0918319
BRD-A69651145-003-09-8	-3.7256	-3.50996
BRD-A69777949-001-15-0	-0.528924	-0.706608
BRD-A69777949-001-24-2	-2.92749	-2.28897
BRD-A69786436-003-03-3	-1.30009	-1.5924
BRD-A69815203-001-05-0	-2.99618	-7.27909
BRD-A69815203-001-07-6	-0.735108	-0.49226
BRD-A69917777-065-01-4	-2.46105	-4.99122
BRD-A69917777-065-02-2	-0.0902158	0.0744763
BRD-A69960130-066-01-4	-4.51797	-10.1713
BRD-A70083328-001-12-8	-0.793387	-1.4166
BRD-A70083328-001-24-3	0.27422	0.374065
BRD-A70268693-050-01-2	-5.50534	-4.95999
BRD-A70268693-103-01-9	-5.43215	-12.0059
BRD-A70407468-001-01-2	-1.24585	-2.55227
BRD-A70407468-001-02-0	-1.12021	-2.84754
BRD-A70407468-001-03-8	-3.02251	-0.737752
BRD-A70461345-003-03-0	-0.115678	-0.0228211
BRD-A70514680-003-11-2	0.978683	1.94095
BRD-A70649075-008-17-5	-4.62388	-11.3584
BRD-A70649075-008-30-8	-4.60978	-4.03958
BRD-A70858459-001-01-7	-1.564	-1.35324
BRD-A70998768-004-01-1	-3.87099	-3.4024
BRD-A71001587-001-03-4	-2.10236	-2.1773
BRD-A71033472-003-15-5	-4.21584	-4.66902
BRD-A71033472-003-23-9	-3.82081	-3.73264
BRD-A71157293-003-10-0	-1.34771	-1.2734
BRD-A71262238-001-08-4	-2.05519	-0.866012
BRD-A71407503-001-01-8	-1.98633	-3.95553
BRD-A71407503-001-02-6	-0.334046	-0.0729694
BRD-A71725768-001-01-3	1.93806	2.21912
BRD-A71765060-001-01-4	-2.02905	-1.33616
BRD-A71774530-001-02-6	-0.762273	-0.530801
BRD-A71774530-001-05-9	-3.25065	-1.39459
BRD-A71816415-236-03-5	-2.60364	-2.94392
BRD-A71960694-001-01-5	-3.86693	-4.15513
BRD-A72066420-001-01-1	-1.01173	-3.22136
BRD-A72066420-001-04-5	-1.36746	0.30031
BRD-A72212290-300-01-4	-2.73055	-2.38069
BRD-A72309220-001-03-3	-3.62469	-3.87451
BRD-A72309220-001-04-1	-4.67624	-3.91711
BRD-A72351335-001-04-5	-1.75111	-1.35692
BRD-A72390365-001-15-2	1.60151	1.63859
BRD-A72401848-001-02-2	-0.500595	-0.318761
BRD-A72483914-001-02-9	-1.9092	-5.27181
BRD-A72483914-001-03-7	-2.35195	-1.57827
BRD-A72596465-001-01-3	-3.85332	-4.50236
BRD-A72703248-003-03-1	-4.03204	-4.77908
BRD-A72703248-003-04-9	-6.0889	-5.30808
BRD-A72711497-236-03-8	-4.02823	-3.63033
BRD-A72758037-001-01-8	-2.4945	-4.74301
BRD-A72767275-003-01-6	-1.50591	-1.27336
BRD-A72988804-001-11-1	-1.11329	-0.97726
BRD-A73368467-003-07-7	-1.59146	-4.41926
BRD-A73368467-003-17-6	-1.45529	1.03517
BRD-A73368467-003-19-2	-2.76427	-1.51761
BRD-A73385064-001-01-5	0.10212	0.663744
BRD-A73427433-240-01-3	-1.27456	-0.266217
BRD-A73556557-001-06-4	-1.35353	-0.896372
BRD-A73556557-001-07-2	-1.4077	-1.13731
BRD-A73559168-001-03-6	-1.41121	-1.56536
BRD-A73566563-001-01-6	-0.036485	2.77243
BRD-A73679382-236-01-8	-0.5974	0.135875
BRD-A73709786-001-01-3	-2.022	-1.238
BRD-A73709786-001-02-1	-0.933236	-0.846846
BRD-A73741725-001-01-0	-4.2504	-9.04895
BRD-A73859745-236-01-8	-1.59792	-1.87935
BRD-A73871920-236-03-6	-5.49867	-5.36883
BRD-A73891132-001-01-0	-2.29785	-1.9235
BRD-A73908300-001-06-7	-1.25884	0.770613
BRD-A73908300-001-09-1	-2.58946	-1.95129
BRD-A73930134-001-03-0	-1.79147	-1.42094
BRD-A74160776-001-03-6	-1.68011	-1.17993
BRD-A74208568-003-01-5	-1.79172	-1.79298
BRD-A74208568-003-02-3	-2.92051	-2.5677
BRD-A74347210-001-01-7	-1.3283	-0.37208
BRD-A74387232-001-01-7	-2.7634	-2.59383
BRD-A74387232-001-02-5	-3.30357	-1.61405
BRD-A74391928-051-01-3	-4.04998	-2.04791
BRD-A74391928-051-02-1	-2.69999	-2.34613
BRD-A74667430-001-15-2	-0.822209	-1.80763
BRD-A74667430-001-23-6	-1.35843	-0.77698
BRD-A74667430-001-25-1	-2.74278	-2.04675
BRD-A74765037-001-01-1	-1.87434	-1.87338
BRD-A74914197-001-02-9	-3.02083	-2.60701
BRD-A74975734-004-09-9	-2.42467	-2.11471
BRD-A74975734-004-10-7	-3.43664	-3.26793
BRD-A74980173-001-06-9	-1.99347	-1.7175
BRD-A74980173-001-11-9	-0.953483	-0.266811
BRD-A75015151-001-07-7	-2.21761	-1.85975
BRD-A75140635-003-10-9	-1.72667	-1.14392
BRD-A75172220-001-03-2	-2.11545	-4.32213
BRD-A75224450-001-02-4	-3.18685	-2.73719
BRD-A75305484-001-01-3	-3.41367	-3.05647
BRD-A75369945-001-01-2	2.82004	6.46319
BRD-A75402480-001-03-8	-3.06308	-7.54889
BRD-A75455249-001-12-9	-1.92592	-5.04518
BRD-A75478957-001-01-6	-1.35177	-4.00917
BRD-A75479906-001-02-4	-2.85371	-2.73655
BRD-A75514485-001-01-9	-2.54472	-1.56756
BRD-A75552914-001-09-3	-2.61156	-5.89774
BRD-A75552914-001-15-0	-1.21907	-1.01905
BRD-A75726477-003-14-8	-2.21348	-2.27197
BRD-A75726477-003-21-3	-2.69725	-1.56122
BRD-A75769826-003-01-3	-1.68303	-0.928144
BRD-A75769826-003-03-9	-4.25613	-3.43812
BRD-A75769826-003-04-7	-2.34578	-2.21945
BRD-A75817871-001-06-7	-3.80353	-1.93908
BRD-A75850590-003-06-4	-0.52448	-0.270472
BRD-A75850590-213-01-0	-1.06266	-0.389091
BRD-A75919782-399-03-4	-4.71584	-4.37982
BRD-A75935363-344-05-8	-2.68088	-2.26052
BRD-A75954196-001-03-3	-1.36009	-1.05484
BRD-A76019558-001-01-0	-2.89585	-5.09914
BRD-A76093993-001-01-8	-3.2972	-5.89774
BRD-A76244192-001-01-6	-1.76901	-2.48158
BRD-A76417540-001-03-3	-1.61122	-1.60593
BRD-A76672327-003-02-0	-1.01898	-0.957453
BRD-A76747559-001-02-3	-1.12896	-1.16979
BRD-A76899420-001-03-7	-1.07563	-0.780988
BRD-A76904477-003-05-8	-1.40232	-1.77497
BRD-A76941896-001-01-6	-5.78955	-6.92361
BRD-A77118605-237-01-2	-0.840056	-0.551087
BRD-A77164655-001-03-1	-1.15786	-0.591658
BRD-A77218119-001-02-7	-3.34179	-7.91581
BRD-A77218119-001-03-5	-0.410965	0.225588
BRD-A77218119-001-04-3	-2.28969	-2.26591
BRD-A77291778-003-15-4	-4.95834	-9.28638
BRD-A77291778-003-22-0	-4.08683	-2.93971
BRD-A77299732-001-01-6	-2.38859	-3.0379
BRD-A77349281-001-02-2	-0.895773	-0.956968
BRD-A77488069-001-03-4	-3.48468	-3.08338
BRD-A77577770-003-08-9	-2.9971	-1.83599
BRD-A77824596-001-03-2	-3.4116	-3.99876
BRD-A78093359-001-06-3	-2.79716	-2.36797
BRD-A78195072-001-06-2	-1.58539	-0.58176
BRD-A78277353-001-01-9	-1.84707	-1.75908
BRD-A78303415-001-03-5	-1.56432	-2.34043
BRD-A78322124-003-16-5	-4.12893	-3.43435
BRD-A78341343-001-01-6	1.50601	2.27822
BRD-A78377521-001-03-0	-1.90362	-4.13867
BRD-A78377521-001-06-3	-3.5191	-3.4871
BRD-A78391468-001-01-0	-2.1043	-3.45878
BRD-A78391468-001-02-8	1.00401	2.01158
BRD-A78588743-001-03-4	-1.8486	-0.670519
BRD-A78723049-001-01-2	-1.84437	-1.61141
BRD-A78877355-001-03-0	-1.46166	-0.706692
BRD-A78942461-003-01-3	-5.28722	-10.5814
BRD-A78952587-001-01-5	-0.460071	-0.376717
BRD-A78952587-001-02-3	-2.76691	-1.47724
BRD-A79052425-003-01-5	-1.46579	-1.29297
BRD-A79380603-304-01-6	-0.882281	-0.520659
BRD-A79431551-001-01-1	-0.612461	2.85367
BRD-A79643124-001-01-9	0.422739	2.726
BRD-A79672927-001-10-8	-2.90262	-3.58798
BRD-A79672927-001-20-7	-0.788582	-1.61061
BRD-A79672927-001-22-3	-2.9644	-1.63131
BRD-A79726147-001-01-5	-2.98909	-1.68975
BRD-A79768653-001-02-1	-3.50902	-8.77916
BRD-A79768653-001-14-6	-4.27858	-4.11637
BRD-A79769222-001-01-3	-2.98001	-2.4013
BRD-A79803969-003-06-2	-1.88457	-2.57963
BRD-A79803969-003-16-1	-0.822614	-0.326424
BRD-A79981887-003-09-9	-1.39636	-3.77175
BRD-A79981887-003-16-4	-2.30348	-0.658383
BRD-A80017228-001-15-8	-3.63165	-8.07769
BRD-A80017228-001-25-7	-1.87199	-0.637174
BRD-A80079592-001-03-2	-1.56899	-1.01427
BRD-A80151636-066-03-0	-4.2727	-9.14608
BRD-A80213327-305-08-3	-3.46065	-1.09258
BRD-A80213327-305-13-3	-4.50736	-3.09759
BRD-A80280426-001-02-0	1.7336	2.15915
BRD-A80567330-001-01-7	-2.10874	-0.382305
BRD-A80594172-001-03-8	-1.41787	-1.62621
BRD-A80641450-001-01-4	-1.50785	-3.45878
BRD-A80871782-004-06-9	-0.00636887	0.0436446
BRD-A80908310-003-08-8	-2.90019	-2.7622
BRD-A80908310-003-13-8	-5.50713	-3.49766
BRD-A80968824-001-03-6	-1.05785	-0.351614
BRD-A81011490-001-01-1	0.686577	-2.05824
BRD-A81129465-001-03-8	0.185645	0.328604
BRD-A81177136-001-12-7	-2.88131	-2.34472
BRD-A81233518-004-07-0	-2.21348	-2.37677
BRD-A81233518-004-16-1	-3.21238	-1.08557
BRD-A81370665-001-03-6	-1.43873	0.245912
BRD-A81370665-001-06-9	-1.9157	-1.83961
BRD-A81513827-001-03-6	-1.65391	-1.53901
BRD-A81541225-001-06-8	-5.81567	-5.71477
BRD-A81603255-001-01-0	-0.946667	-0.377
BRD-A81615860-003-01-7	-1.68746	-0.75355
BRD-A81772229-001-03-2	-1.87453	-2.43854
BRD-A81795050-003-01-7	-0.922546	-4.57034
BRD-A81866333-003-01-5	-2.19349	-5.05597
BRD-A82013137-300-01-1	-3.00264	-1.53883
BRD-A82035391-001-02-7	-3.96425	-4.66641
BRD-A82035391-001-03-5	-3.16156	-1.46987
BRD-A82086877-001-03-1	-1.51788	-1.07513
BRD-A82238138-001-01-7	-2.32986	-2.30018
BRD-A82371568-001-01-5	-5.97286	-13.8405
BRD-A82396632-008-14-2	-3.48468	-3.83732
BRD-A82396632-008-29-0	-5.50907	-8.27121
BRD-A82396632-008-30-8	-5.62476	-2.63701
BRD-A82440780-001-01-0	-0.922284	-1.39969
BRD-A82452087-001-01-5	-3.46912	-3.72575
BRD-A82522119-001-01-7	0.628613	0.980231
BRD-A82590476-001-01-1	-2.09872	-3.76095
BRD-A82656074-003-01-2	-5.49904	-12.2649
BRD-A82769570-001-01-6	-3.04624	-3.00655
BRD-A82772293-001-03-2	-4.46527	-4.15646
BRD-A83029242-001-07-9	-5.61244	-4.68781
BRD-A83081521-001-01-5	-1.43974	-2.00065
BRD-A83326220-001-04-2	-4.38976	-8.76837
BRD-A83387524-001-01-3	0.331671	2.3796
BRD-A83613346-001-03-4	-1.53566	-1.01765
BRD-A83644949-236-01-6	-5.09908	-3.14726
BRD-A83650191-004-01-0	-4.45173	-4.14015
BRD-A83650191-004-02-8	-4.08672	-3.13124
BRD-A83695761-001-01-1	-1.97051	-4.18184
BRD-A83792282-001-01-6	-2.40671	-1.86245
BRD-A83802939-304-03-4	-1.24008	-0.709989
BRD-A83802939-304-04-2	-0.555282	-0.357177
BRD-A83855350-003-01-4	-2.30858	-2.32901
BRD-A83859836-003-02-8	-4.37303	-10.3548
BRD-A83937277-001-10-5	-0.680907	-0.524563
BRD-A84045418-001-01-5	-4.87092	-6.48372
BRD-A84174393-236-03-0	-2.13217	-4.33292
BRD-A84174393-236-07-1	-1.50591	-1.48408
BRD-A84174873-001-06-0	-0.0531932	-0.219065
BRD-A84189249-001-03-2	-0.502256	0.0743798
BRD-A84189516-001-01-2	-4.14838	-6.48372
BRD-A84202322-001-01-7	-4.6422	-2.73291
BRD-A84389091-001-01-1	-0.955992	-2.22851
BRD-A84389633-001-02-4	-2.92372	-4.60272
BRD-A84389633-001-05-7	-0.616516	0.286718
BRD-A84465106-001-01-2	-1.10896	-0.483469
BRD-A84481105-003-17-2	-6.64735	-14.9629
BRD-A84481105-003-31-3	-8.59002	-6.56681
BRD-A84575140-001-02-4	2.12882	3.13418
BRD-A84663931-001-03-9	-1.8179	-2.24492
BRD-A84687895-001-03-2	-2.06999	-1.20431
BRD-A84687895-001-04-0	1.20924	1.61913
BRD-A84810646-001-01-6	-0.596235	-0.510203
BRD-A84907376-300-03-8	0.390546	0.677775
BRD-A84913188-001-03-8	-1.58455	-1.46731
BRD-A85025557-001-02-5	-0.433441	2.31979
BRD-A85216385-003-01-6	-6.16238	-13.7542
BRD-A85216385-003-02-4	-7.77176	-6.6276
BRD-A85234536-001-04-5	-1.19569	-2.51989
BRD-A85242401-001-12-3	-2.90564	-1.93063
BRD-A85280935-003-01-7	-1.50785	-2.74652
BRD-A85295731-001-05-6	-2.37685	-0.228171
BRD-A85472596-001-01-4	-0.81106	-3.0379
BRD-A85472596-001-02-2	0.0176401	0.23648
BRD-A85548292-001-01-8	-0.79021	-0.271657
BRD-A85587465-001-02-5	-3.21358	-5.96249
BRD-A85587465-001-03-3	-3.55467	-1.30829
BRD-A85587465-001-04-1	-3.91568	-3.67551
BRD-A85651701-001-19-7	-1.59397	-1.4162
BRD-A85667082-001-10-1	-5.07968	-4.85036
BRD-A85667082-001-11-9	-2.60872	-2.32759
BRD-A85667082-001-12-7	-4.52773	-4.07821
BRD-A85667082-001-13-5	-3.38658	-3.2351
BRD-A85739295-001-03-6	-1.22262	-2.75121
BRD-A85876464-001-01-5	-2.88517	-1.60325
BRD-A86044036-001-26-5	-0.422401	-0.271067
BRD-A86216746-046-02-6	-0.21987	-0.0878904
BRD-A86248581-001-01-4	-1.13651	-0.95782
BRD-A86354194-002-01-7	-0.777802	-0.547371
BRD-A86414188-003-01-5	-2.04258	-0.815606
BRD-A86415025-050-01-0	-4.19707	-1.92971
BRD-A86415025-103-01-7	-2.62828	-4.6243
BRD-A86523169-001-01-0	-0.201749	0.317979
BRD-A86619021-001-04-8	-3.25283	-3.01645
BRD-A86665761-001-01-1	-2.01482	-1.61123
BRD-A86871940-001-01-9	-2.12171	-1.24092
BRD-A87005460-001-01-3	-1.38454	-1.50788
BRD-A87130939-001-07-9	-1.16126	-1.10264
BRD-A87387433-001-01-9	-1.54455	-2.07587
BRD-A87435144-001-01-6	-0.708558	-0.239965
BRD-A87445400-003-03-6	-3.04143	-2.75121
BRD-A87479750-001-01-9	-1.73082	-5.14231
BRD-A87479750-001-02-7	0.217491	0.964207
BRD-A87479750-001-03-5	-2.36698	-0.392915
BRD-A87606379-001-13-3	-0.108699	-1.52704
BRD-A87673115-001-04-1	-2.64432	-1.83316
BRD-A87715314-003-09-4	-1.78679	-1.22389
BRD-A87715314-003-14-4	0.57055	0.755308
BRD-A87983072-001-01-1	-1.02939	-0.524967
BRD-A88080608-001-03-4	-1.21241	-3.87966
BRD-A88080608-001-04-2	-2.61071	-4.02774
BRD-A88138582-001-03-0	-1.22675	-0.966938
BRD-A88138582-001-04-8	-0.865961	-0.850087
BRD-A88254928-001-05-3	-1.40454	-1.5924
BRD-A88254928-001-07-9	3.43771	5.12811
BRD-A88284590-001-03-2	-1.75345	-0.855368
BRD-A88369366-001-01-7	-1.05488	-0.919443
BRD-A88548664-004-01-9	-1.48232	-1.9643
BRD-A88548664-004-02-7	-2.13429	-1.9027
BRD-A88562598-001-01-7	-4.27441	-3.40081
BRD-A88592539-001-01-6	-0.265928	-2.05824
BRD-A88684804-001-01-9	-1.51344	-1.38955
BRD-A88684804-001-04-3	-0.33144	0.475428
BRD-A88691025-001-07-4	-1.31275	-3.3077
BRD-A88787317-001-01-0	-3.03766	-2.85344
BRD-A89082344-001-08-7	-2.29389	-1.14717
BRD-A89164055-001-03-3	-1.23833	-0.811749
BRD-A89175223-051-05-6	-0.677277	-1.21408
BRD-A89175223-051-14-8	-0.790705	-0.528628
BRD-A89196962-300-01-7	-0.615142	-0.447944
BRD-A89207210-001-01-6	0.158632	0.343669
BRD-A89208012-001-01-4	-2.38301	-4.43005
BRD-A89337244-001-02-9	0.544125	0.639827
BRD-A89471977-001-05-2	-3.67033	-2.60572
BRD-A89585551-003-08-3	-5.87234	-5.65751
BRD-A89585551-003-16-6	-5.80363	-8.12028
BRD-A89594340-003-11-5	-0.11432	0.8458
BRD-A89672324-001-02-2	-1.0842	-0.577363
BRD-A89672324-001-04-8	-3.11505	-2.2248
BRD-A90131694-001-02-8	-1.9092	-3.18899
BRD-A90201073-001-01-2	-4.86533	-3.33666
BRD-A90249268-001-04-0	-0.928951	-1.04808
BRD-A90272038-001-01-7	-0.369801	-0.337656
BRD-A90272038-001-02-5	-3.09064	-2.76599
BRD-A90311807-236-01-4	-1.56359	-4.19263
BRD-A90515964-001-09-0	-1.58567	-2.78164
BRD-A90515964-001-16-5	0.609542	2.69118
BRD-A90547603-001-02-5	-1.57279	-1.23128
BRD-A90551241-001-10-8	2.49745	3.11593
BRD-A90625545-001-02-0	-0.64123	-0.322344
BRD-A90642009-001-03-2	0.103181	1.60399
BRD-A90695733-001-07-4	-2.60232	-4.25577
BRD-A90695733-001-08-2	-8.14199	-7.26298
BRD-A90751343-001-01-0	-2.62495	-1.02036
BRD-A90799790-001-19-9	-1.29125	-1.88662
BRD-A90799790-001-20-7	-5.52571	-3.12947
BRD-A90926615-001-01-9	-0.278869	-0.880521
BRD-A90926615-001-02-7	-1.80358	0.642846
BRD-A90969585-001-03-1	-1.20897	-1.76483
BRD-A91008255-003-16-4	-5.28722	-12.1138
BRD-A91008255-003-24-8	-3.71142	-2.39154
BRD-A91008255-003-26-3	-7.42046	-5.35546
BRD-A91031770-001-01-8	-9.80623	-5.94744
BRD-A91353509-001-01-4	-1.52899	-1.92711
BRD-A91366704-001-01-9	-3.15088	-2.826
BRD-A91404865-001-01-3	-0.427523	-0.692428
BRD-A91444184-300-01-9	-2.86461	-2.79206
BRD-A91452556-001-03-2	0.805486	2.41198
BRD-A91452556-001-04-0	2.56487	2.90013
BRD-A91699651-316-06-7	-3.77109	-5.14996
BRD-A91699651-316-10-9	-3.67881	-2.87455
BRD-A91702150-236-03-2	-1.52232	-1.39293
BRD-A91728607-236-11-9	-2.10485	-0.813507
BRD-A91733352-300-01-1	-2.61573	-2.83996
BRD-A91733352-300-04-5	-1.41473	-1.0056
BRD-A91822151-001-05-0	-2.06018	-1.51025
BRD-A91831168-003-02-5	-3.86743	-3.79266
BRD-A91992993-001-01-2	0.955992	0.339943
BRD-A92096630-001-02-8	-2.17131	-1.11436
BRD-A92177080-001-01-3	-1.12879	-2.30406
BRD-A92177080-001-02-1	2.06447	2.36585
BRD-A92262698-001-01-7	-1.34848	-1.31422
BRD-A92439610-001-03-2	-1.87042	-3.26849
BRD-A92439610-001-04-0	1.54356	2.343
BRD-A92439610-001-05-7	-1.98738	-1.83688
BRD-A92448440-001-01-3	-2.01763	-1.26583
BRD-A92537424-001-03-9	-2.77879	-6.69633
BRD-A92537424-001-04-7	-1.40644	-0.935516
BRD-A92542880-001-01-0	-1.67789	-1.47745
BRD-A92585442-237-01-0	-0.0250843	-3.39403
BRD-A92630576-050-14-2	-1.99791	-1.04132
BRD-A92630576-050-24-1	-2.28947	-1.70513
BRD-A92651262-003-03-9	-1.92381	-3.1417
BRD-A92652541-005-01-9	-1.34231	-1.33884
BRD-A92670106-003-05-4	-0.386017	0.0682488
BRD-A92800748-001-05-5	1.15599	2.28533
BRD-A92826379-001-01-5	-0.706928	0.991265
BRD-A92826379-009-03-4	-3.39196	-2.56306
BRD-A92872453-001-01-8	-1.42297	-0.770788
BRD-A92933783-050-01-6	-1.36488	-0.017865
BRD-A92933783-103-01-3	-4.86357	-10.7864
BRD-A93000692-001-03-2	-1.89581	-2.85938
BRD-A93000692-001-08-1	0.67181	2.77243
BRD-A93093700-001-02-9	-0.508466	0.0707144
BRD-A93236127-001-03-7	-2.36071	-5.00202
BRD-A93236127-001-04-5	-1.93839	-1.19519
BRD-A93255169-001-28-3	-1.67719	-1.25418
BRD-A93269281-003-01-0	-3.17456	-7.44097
BRD-A93353767-008-02-2	-1.04861	-0.988424
BRD-A93407926-001-01-1	0.389909	1.06926
BRD-A93424738-001-03-0	0.275928	1.60259
BRD-A93436351-001-01-4	-2.61713	-6.18912
BRD-A93477898-001-03-4	-2.6855	-3.44091
BRD-A93477898-001-04-2	-0.139109	-0.0647239
BRD-A93572202-001-03-3	-4.17806	-4.60817
BRD-A93659613-051-03-6	-2.37744	-6.0812
BRD-A93683007-001-01-9	-0.511562	0.372893
BRD-A93695607-322-02-5	-1.81374	-1.51577
BRD-A93699261-236-03-4	-2.24856	-1.49506
BRD-A93717708-051-01-2	-5.37645	-2.55212
BRD-A93739713-065-03-5	-1.42454	-1.12246
BRD-A93964801-003-03-3	-3.1924	-2.98516
BRD-A94008949-001-01-9	-4.8172	-2.34019
BRD-A94033181-001-01-4	-1.19227	-1.09016
BRD-A94046266-001-01-4	-1.68065	-2.96236
BRD-A94276798-001-01-4	-1.77458	-1.43769
BRD-A94323479-001-02-8	-3.24225	-1.42832
BRD-A94366206-001-03-5	-1.21341	-1.86288
BRD-A94413429-003-01-6	-3.1001	-3.51081
BRD-A94523291-304-01-9	-2.53644	-2.30838
BRD-A94523291-304-02-7	-2.29696	-3.16362
BRD-A94543220-001-12-2	-1.19119	-1.07513
BRD-A94543220-001-24-7	-4.43501	-3.78811
BRD-A94561690-001-02-6	-0.771163	-0.236663
BRD-A94580299-001-10-4	-5.37645	-2.35583
BRD-A94624445-236-17-0	-0.709079	-1.952
BRD-A94624445-236-18-8	-2.75589	-1.84423
BRD-A94640958-001-01-7	1.50829	1.56866
BRD-A94675310-003-01-2	-2.53412	-2.5769
BRD-A94709349-001-03-4	-2.12102	-4.51638
BRD-A94709349-001-08-3	0.162226	0.754499
BRD-A94756469-001-03-9	-3.21916	-6.32941
BRD-A94756469-001-04-7	1.52146	3.24459
BRD-A94965935-001-01-6	-0.617898	0.158761
BRD-A94993966-001-04-4	-0.278506	1.31151
BRD-A94993966-001-05-1	-0.510025	0.308528
BRD-A95121829-001-08-9	-1.73074	-0.553898
BRD-A95207036-001-03-6	-1.90235	-1.58226
BRD-A95300432-001-01-3	-0.290972	0.0137258
BRD-A95340155-001-09-7	2.80613	3.62745
BRD-A95489119-001-01-4	-1.72877	-0.813968
BRD-A95513702-001-03-0	-4.29499	-8.94104
BRD-A95602221-003-02-1	-0.517383	-0.476282
BRD-A95683721-001-03-8	-4.0058	-2.23912
BRD-A95696066-003-06-2	-3.07422	-6.63158
BRD-A95696066-003-13-8	-2.05227	-1.59651
BRD-A95755460-001-01-3	0.904067	1.32636
BRD-A95802703-001-01-0	-2.96306	-2.81015
BRD-A95869247-001-14-5	-2.95957	-4.06976
BRD-A95869247-001-26-9	-1.58241	-1.12497
BRD-A95886749-001-03-5	0.320335	1.99091
BRD-A95939040-001-01-2	-7.94317	-7.45214
BRD-A96292436-003-16-1	-1.89319	-0.869139
BRD-A96407378-001-15-1	-2.55217	-2.40807
BRD-A96456596-001-01-4	-1.43538	-3.77175
BRD-A96456596-001-02-2	1.09315	1.10798
BRD-A96466199-001-01-4	0.0374019	0.168847
BRD-A96485169-001-05-1	-2.07085	-2.45514
BRD-A96485169-001-14-3	-1.01127	-0.842317
BRD-A96529864-001-01-3	-2.9691	-1.11435
BRD-A96828973-001-05-8	-1.1023	-1.00075
BRD-A96882008-001-01-3	-2.15539	-2.7902
BRD-A96933311-337-01-4	-2.80686	-3.00562
BRD-A96977263-001-02-9	-3.08015	-1.9403
BRD-A96977263-001-03-7	-2.53421	-2.79876
BRD-A97026779-001-01-3	-1.93124	-1.90345
BRD-A97104540-004-08-5	-0.0250843	-0.253608
BRD-A97104540-004-15-0	-1.06267	-0.692254
BRD-A97152619-001-03-7	-1.07563	-1.26108
BRD-A97437073-001-04-9	-2.42203	-4.48401
BRD-A97437073-001-09-8	-4.19451	-1.76696
BRD-A97437073-050-14-5	-1.36552	-2.68166
BRD-A97479839-003-08-3	-4.60715	-9.44825
BRD-A97479839-003-13-3	-1.29713	-0.753488
BRD-A97674275-001-04-3	-3.24703	-7.05246
BRD-A97674275-001-11-8	-1.82801	0.87814
BRD-A97674275-300-04-9	-3.64824	-1.98978
BRD-A97701745-001-09-5	-1.8869	-4.68905
BRD-A97701745-001-16-0	-2.74579	-2.64432
BRD-A97730597-003-11-5	-2.62366	-1.49878
BRD-A97739905-001-15-8	-0.983863	-2.49831
BRD-A97739905-001-26-5	-2.20209	-0.962862
BRD-A98174560-001-02-1	-2.52472	-2.25475
BRD-A98299281-050-09-6	-4.1912	-2.85694
BRD-A98378129-001-01-4	-3.47557	-6.27545
BRD-A98378129-001-02-2	-3.98522	-4.61476
BRD-A98378129-001-03-0	-3.15573	-1.31786
BRD-A98702003-304-03-0	-2.62271	-6.24308
BRD-A98725278-103-01-9	-1.98724	-3.24295
BRD-A98845662-001-03-1	-0.687482	-0.284961
BRD-A98845662-036-03-7	-0.572416	-2.1822
BRD-A98990573-003-01-3	-1.63023	-1.59113
BRD-A99117172-065-02-4	-1.65344	-1.81554
BRD-A99117172-065-04-0	-3.81025	-1.27273
BRD-A99117172-065-05-7	-1.60861	-1.32496
BRD-A99268498-001-06-8	4.27584	7.13708
BRD-A99388803-001-01-5	-4.76257	-3.74634
BRD-A99402294-236-03-8	-1.00229	-0.902701
BRD-A99449986-001-01-4	-2.5937	-3.96047
BRD-A99633051-001-05-4	-1.03785	-1.51464
BRD-A99633051-001-07-0	-1.88392	-0.606063
BRD-A99633051-001-08-8	-0.918543	-0.750434
BRD-A99644790-001-01-6	-2.58576	-2.4572
BRD-A99702332-001-01-7	-0.282248	-1.47455
BRD-A99721021-001-01-3	-2.96242	-3.14762
BRD-A99833829-003-27-1	-1.31071	-1.19488
BRD-A99888680-001-03-8	-1.86519	-1.798
BRD-A99888680-001-04-6	-2.82867	-1.28354
BRD-A99899486-004-01-9	-1.44283	-1.05029
BRD-A99939097-001-24-2	-1.45026	-0.474657
BRD-K00004621-001-02-2	-5.65977	-9.29384
BRD-K00007652-001-01-9	2.45583	1.45677
BRD-K00010082-001-01-3	0.50101	0.955258
BRD-K00027604-001-01-6	3.77829	2.45751
BRD-K00031343-001-01-4	-3.34132	-2.25138
BRD-K00033165-001-02-3	-0.837059	0.261788
BRD-K00038278-019-01-0	-2.47698	-5.58119
BRD-K00046256-001-01-7	-5.04724	-2.45751
BRD-K00046588-001-02-4	-0.189893	-0.943037
BRD-K00048155-001-01-5	-0.283183	-2.10853
BRD-K00048792-001-01-4	0.525783	0.249683
BRD-K00051121-001-01-0	2.47503	2.22928
BRD-K00051764-001-01-2	-1.17411	-0.134898
BRD-K00053901-001-01-2	-6.90495	-4.73569
BRD-K00056770-001-01-3	1.30897	-0.309735
BRD-K00057210-001-01-9	-0.892402	0.187872
BRD-K00057967-001-01-4	-0.551107	-1.17627
BRD-K00059671-001-01-7	-1.65316	-1.83785
BRD-K00060006-001-01-1	-1.7848	-1.3767
BRD-K00061590-001-01-1	-0.544	0.13274
BRD-K00064877-001-01-9	-1.82522	-3.14541
BRD-K00064929-001-01-7	-1.34206	-0.994795
BRD-K00069055-001-02-0	-0.00468396	-0.551169
BRD-K00069117-001-01-8	-0.482903	-1.00201
BRD-K00072294-001-02-5	-3.28634	-2.84249
BRD-K00074020-001-01-4	-1.66558	-2.62237
BRD-K00077635-304-01-2	-1.9491	-1.56605
BRD-K00079408-001-01-5	-1.55577	-1.14566
BRD-K00080506-001-01-4	-4.83003	-2.05811
BRD-K00082544-001-02-2	-0.676139	-1.98584
BRD-K00082797-001-04-2	-3.01856	-4.14894
BRD-K00083140-001-01-0	0.505003	0.21867
BRD-K00083176-001-01-7	-0.376104	0.0677717
BRD-K00086692-001-01-5	-0.270629	0.0774534
BRD-K00087810-001-01-0	-1.17966	1.09927
BRD-K00091711-001-01-2	-3.56134	-2.10656
BRD-K00097148-001-01-2	1.04504	1.57811
BRD-K00097495-001-01-1	-1.14836	-1.43214
BRD-K00103112-001-01-0	-1.63953	-2.10971
BRD-K00107477-001-01-0	-1.70871	-1.02559
BRD-K00111109-001-01-8	-1.98217	-2.18046
BRD-K00116137-001-02-1	-1.28039	-0.680603
BRD-K00117533-001-01-1	-1.79172	-1.29046
BRD-K00117639-001-01-4	-0.186782	-0.951677
BRD-K00119817-001-01-4	-1.23656	-1.18094
BRD-K00121083-001-01-7	-2.36071	-2.41719
BRD-K00124431-001-01-0	-2.3207	-1.78505
BRD-K00124439-001-01-2	0.414667	2.52609
BRD-K00125794-001-01-8	1.23138	0.729927
BRD-K00126447-001-01-7	1.85352	1.88649
BRD-K00127118-001-01-3	-0.847796	-2.95511
BRD-K00127363-001-01-5	-1.74319	-3.38788
BRD-K00128985-001-01-1	-3.74947	-3.00903
BRD-K00130151-001-01-5	-2.08063	-1.67502
BRD-K00130965-001-01-1	-4.20376	-4.61493
BRD-K00131662-001-01-5	5.93551	5.26964
BRD-K00132689-001-02-0	-2.86819	-2.90516
BRD-K00133896-001-01-9	-2.2025	-2.24937
BRD-K00135177-001-01-4	0.491167	-0.194031
BRD-K00135362-001-01-9	-1.72254	-1.38286
BRD-K00137579-001-01-4	-2.82329	-2.92058
BRD-K00141503-001-01-7	3.03914	4.34203
BRD-K00144236-001-01-5	-1.60018	-1.86856
BRD-K00144391-001-01-6	-1.67785	-2.02347
BRD-K00144664-001-01-6	0.172946	-0.631372
BRD-K00144777-001-02-8	-0.599546	-1.38752
BRD-K00146811-001-01-3	-0.964548	-0.46472
BRD-K00147404-001-01-4	0.198379	0.482395
BRD-K00150267-001-01-4	-1.39324	-1.69229
BRD-K00152668-001-01-5	-5.55262	-3.91717
BRD-K00163753-001-02-6	-3.83168	-4.15935
BRD-K00165575-001-01-9	-0.914586	-0.396949
BRD-K00167049-001-01-3	-1.33868	-2.32068
BRD-K00172657-001-01-6	-2.11982	-1.63389
BRD-K00173393-001-01-3	0.234357	-1.19004
BRD-K00175211-001-01-8	-0.465593	0.384927
BRD-K00176224-001-02-9	-2.02919	-1.10853
BRD-K00177096-001-01-4	-0.767475	-0.764852
BRD-K00179355-001-01-6	-0.217209	-0.778414
BRD-K00182800-001-01-1	-1.79864	-1.54917
BRD-K00183357-001-01-6	-6.15965	-10.0922
BRD-K00185670-001-01-1	-0.937426	-0.639848
BRD-K00188019-001-01-5	-1.7491	-1.25524
BRD-K00191683-001-01-4	-1.50856	-1.74936
BRD-K00194080-001-02-5	-4.2048	-5.09079
BRD-K00196194-001-01-5	-0.450541	-0.637798
BRD-K00199686-001-01-4	-1.12657	-3.0369
BRD-K00204095-001-01-7	-4.51121	-7.17692
BRD-K00205589-001-01-7	-2.04768	-2.09739
BRD-K00206531-001-02-2	-0.942578	-0.858598
BRD-K00206590-001-01-2	0.108699	-0.771616
BRD-K00207532-001-01-1	-0.67449	-2.46548
BRD-K00211380-001-01-6	-2.33823	-0.545136
BRD-K00217352-001-01-7	-0.636442	0.237149
BRD-K00217361-001-01-6	-5.16156	-2.68166
BRD-K00218068-001-01-0	-10.0931	-8.98396
BRD-K00218372-001-01-1	-0.311303	-2.31254
BRD-K00222558-001-01-9	-2.75728	-5.09174
BRD-K00223956-001-01-5	-1.80522	-4.09482
BRD-K00231187-001-02-7	-2.71231	-4.12723
BRD-K00231307-001-01-4	0.0230141	-0.63461
BRD-K00232157-001-01-3	-3.45855	-4.76961
BRD-K00233837-019-01-1	-3.84575	-7.54386
BRD-K00234197-001-01-1	4.12303	3.77899
BRD-K00236083-001-01-3	-2.22748	-2.89482
BRD-K00240594-001-01-7	-2.73947	-2.83039
BRD-K00241248-001-01-5	0.750821	1.83306
BRD-K00241924-001-01-6	-1.64258	-1.31121
BRD-K00243003-001-01-6	-1.00058	-2.60089
BRD-K00247543-001-01-4	0.642569	1.74593
BRD-K00248287-001-02-0	-3.60206	-3.80605
BRD-K00248354-001-01-0	-0.248423	-0.403403
BRD-K00248931-001-01-2	-3.01456	-3.8318
BRD-K00249063-001-01-0	-0.568271	-0.412188
BRD-K00250978-001-01-2	-1.22884	-2.87509
[truncated: 18,877 more rows]
